# Supplementary material for: Metaprotein expression modeling for label-free quantitative proteomics
Source: PubMed Central journal article supplement (PMC3436780; doi:10.1186/1471-2105-13-74), 2012-05-04

## Supplemental Information 2

E-mail:

---

\*To whom correspondence should be addressed

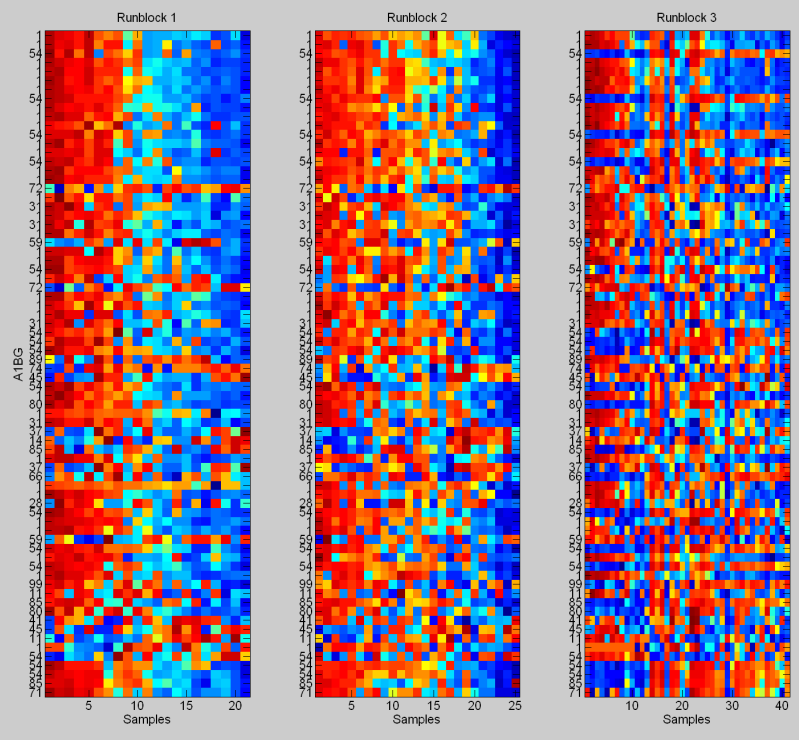

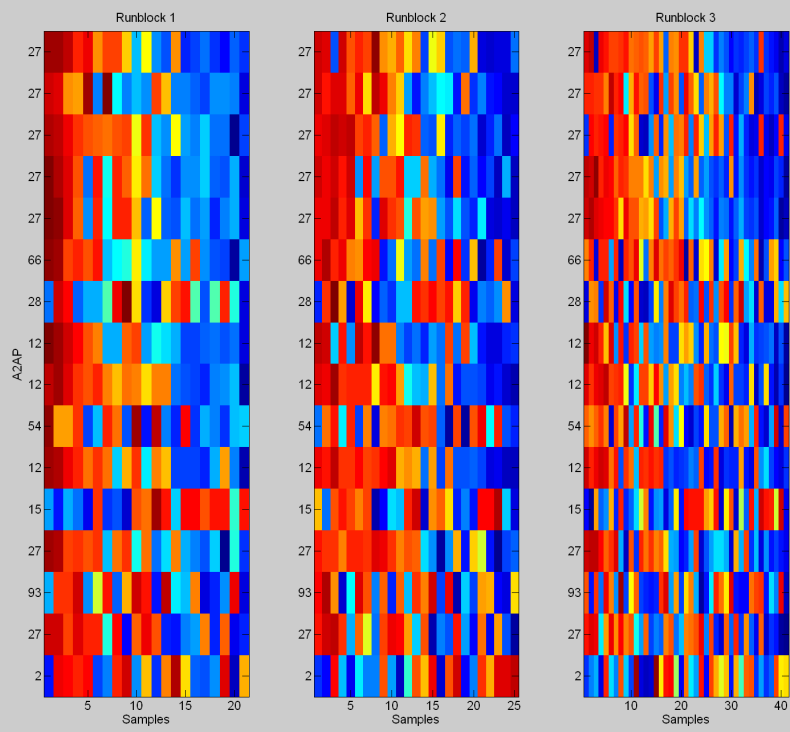

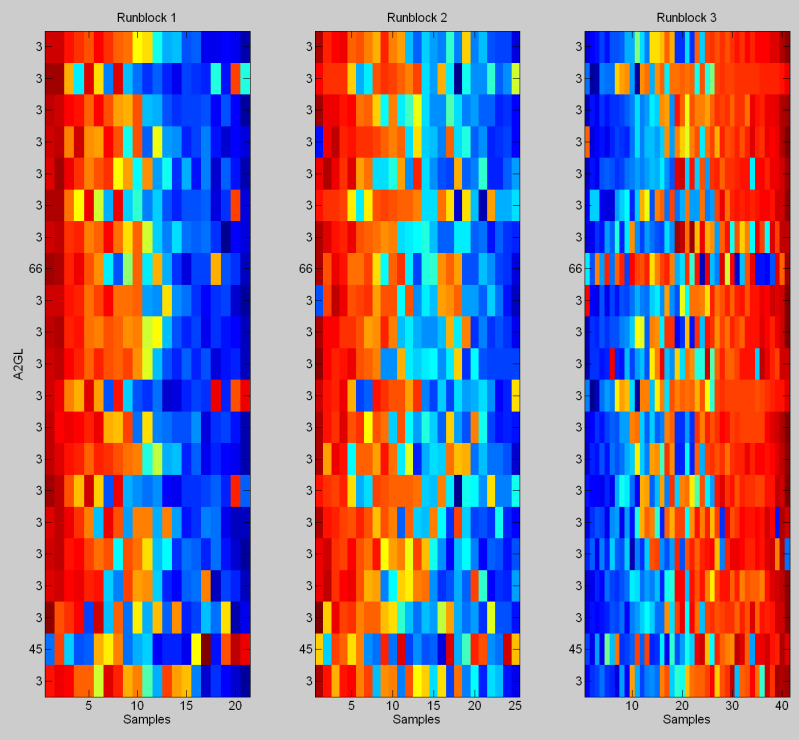

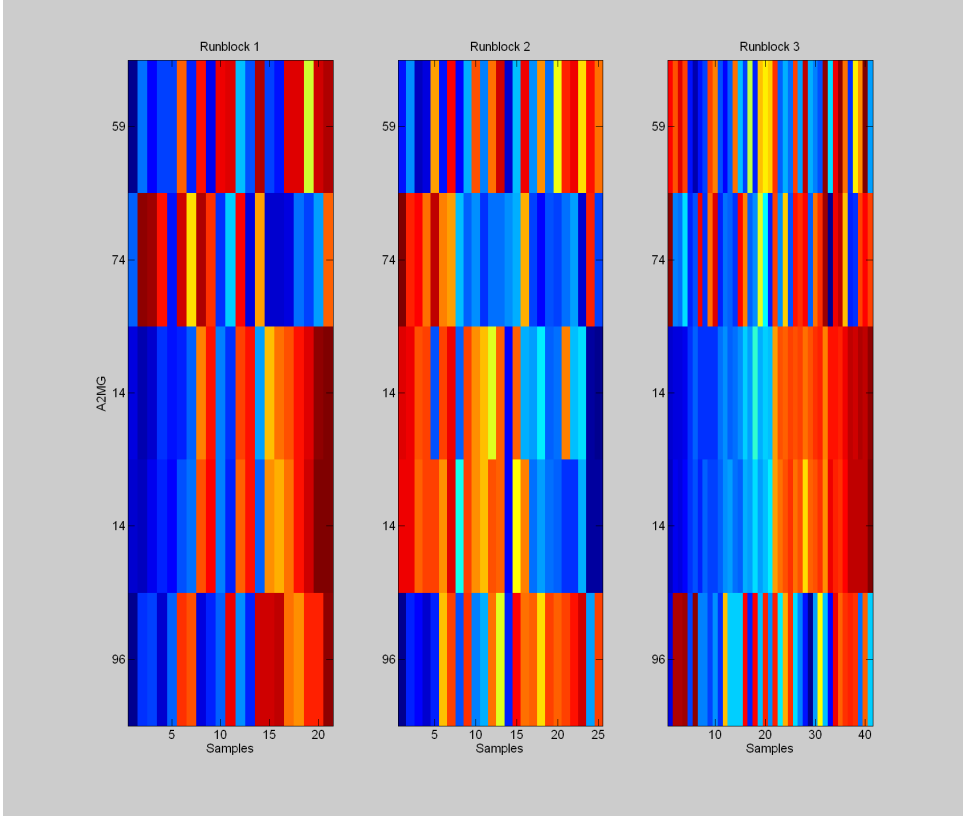

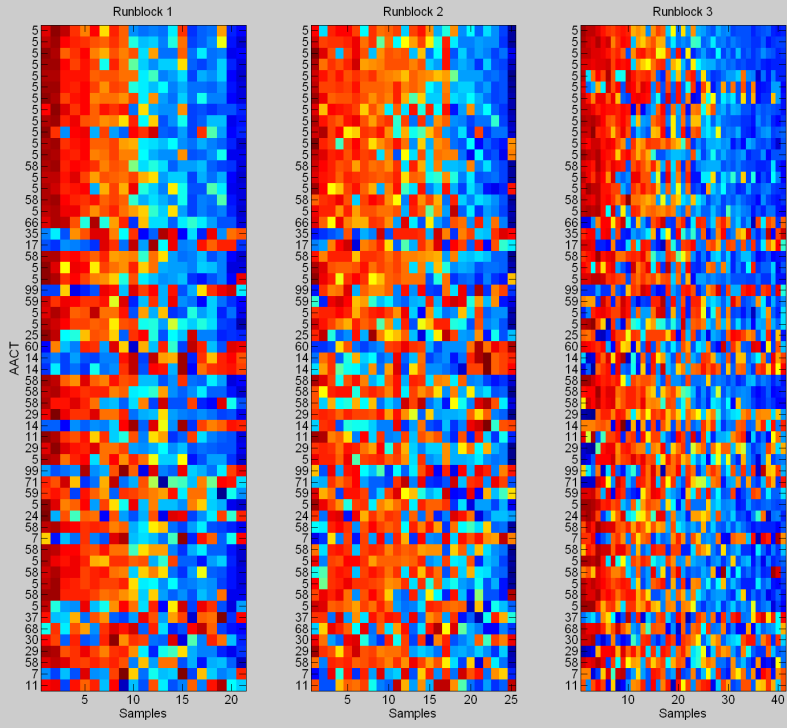

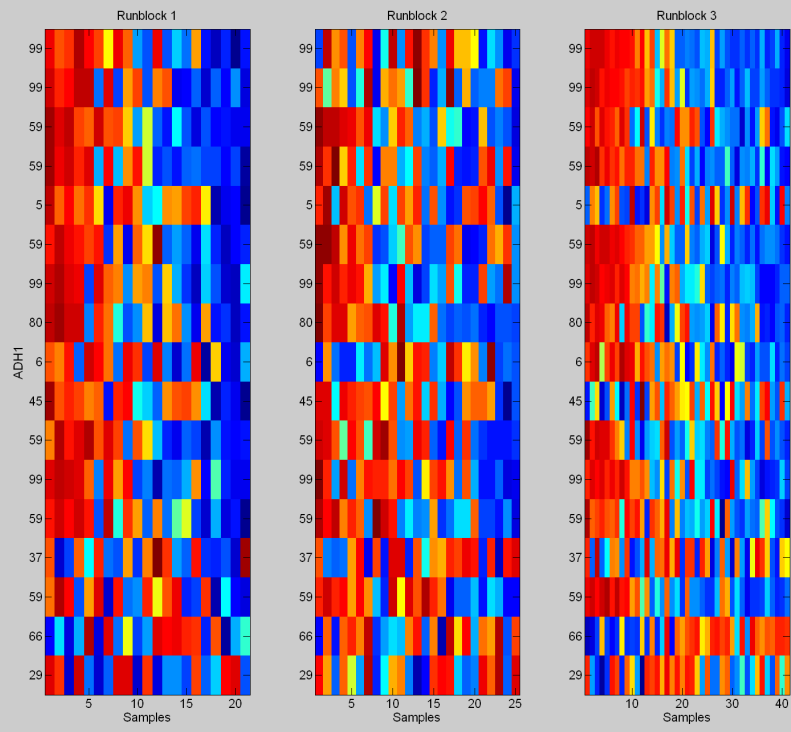

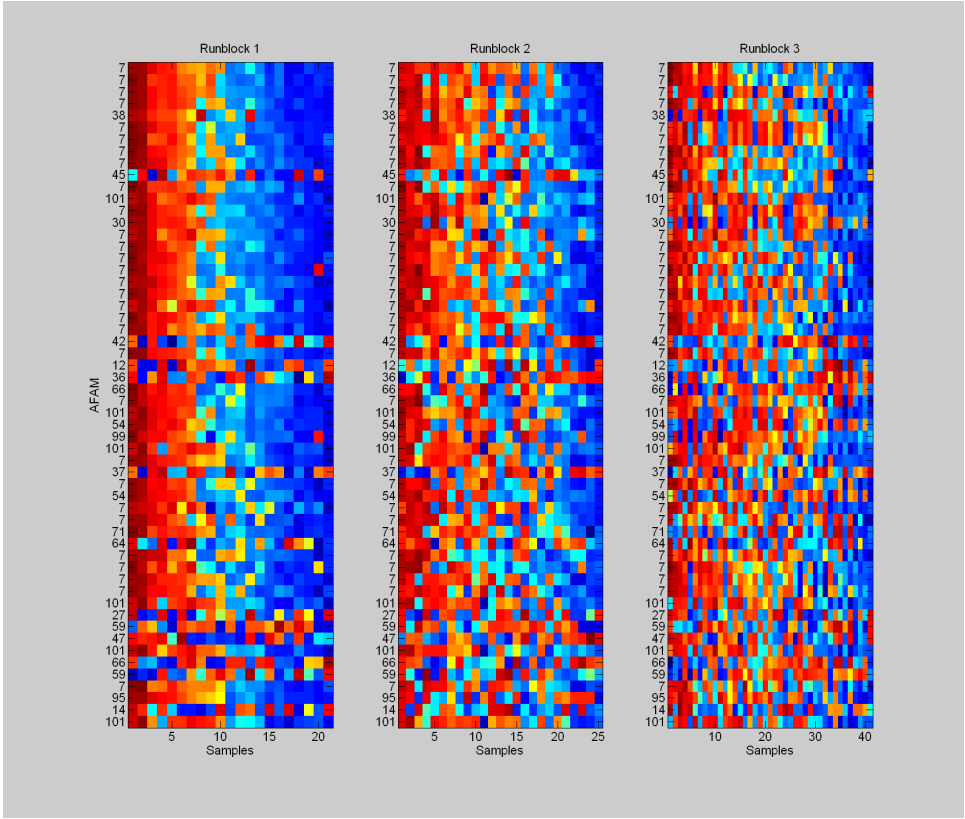



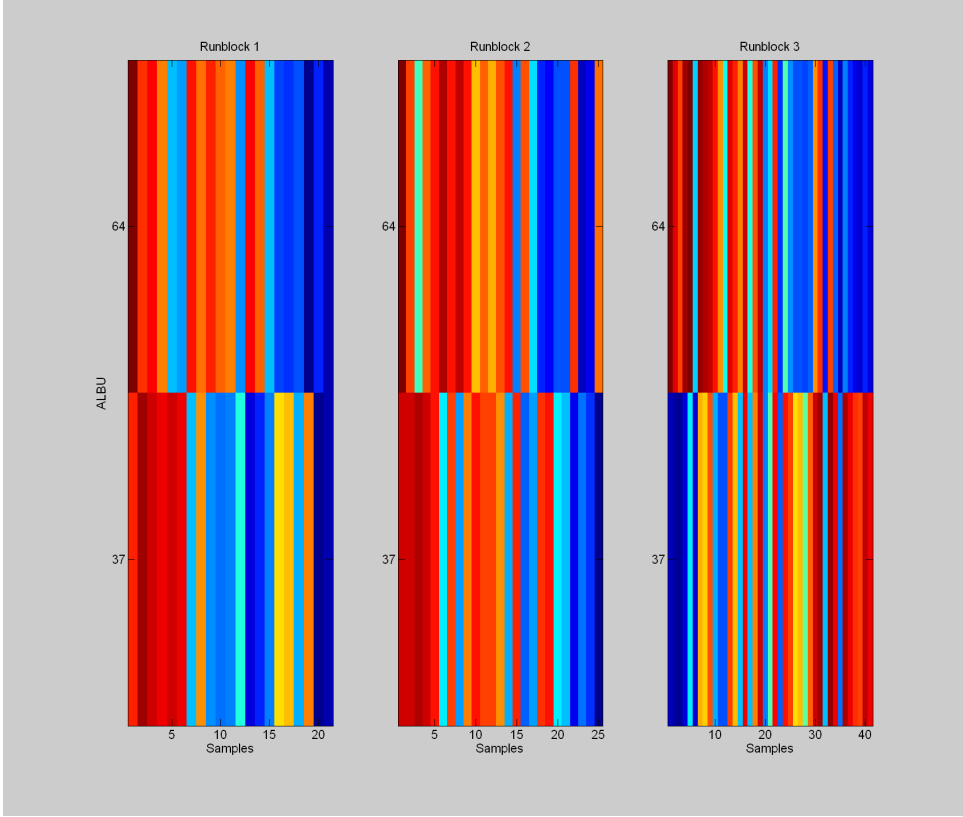

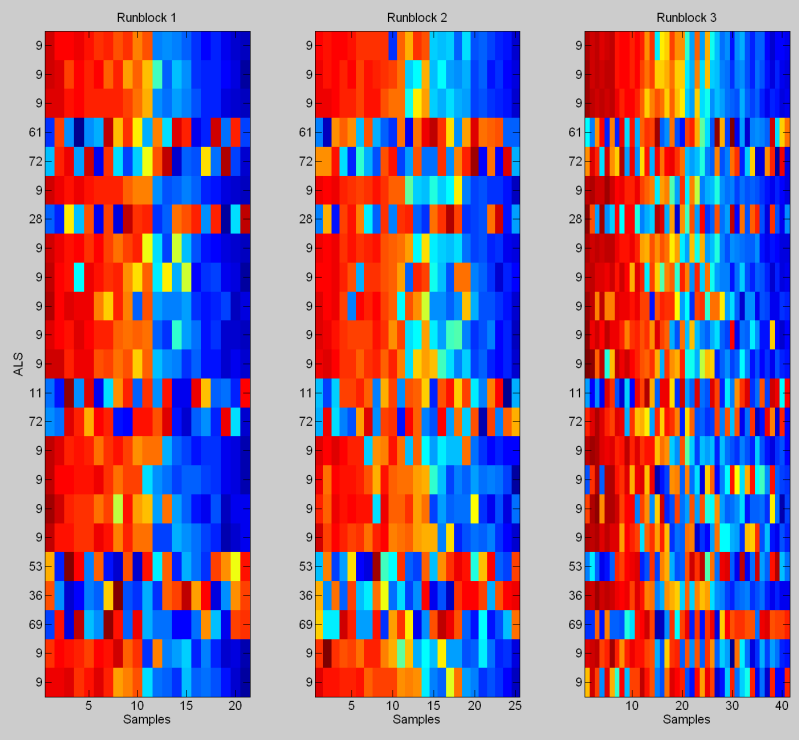

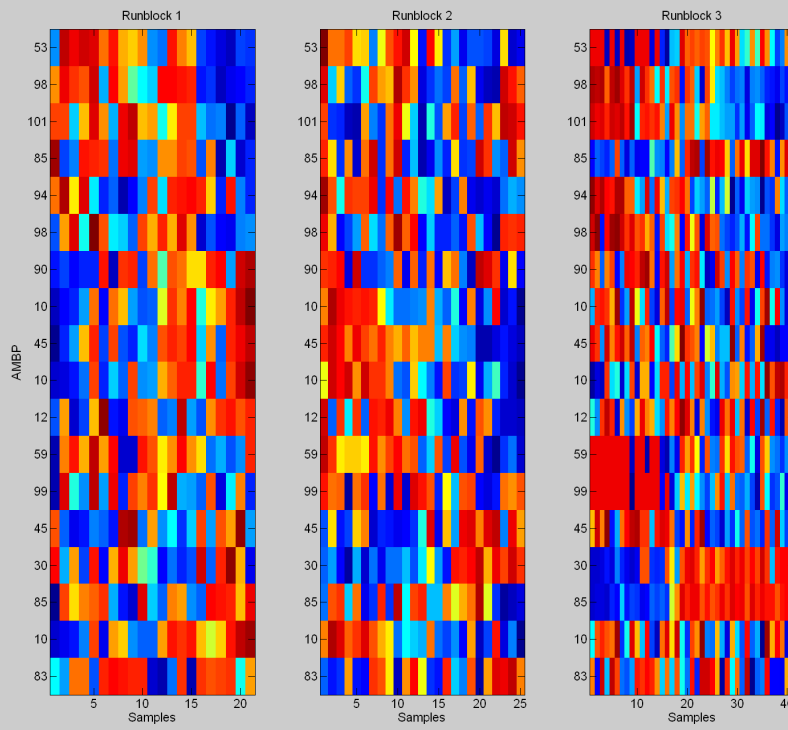

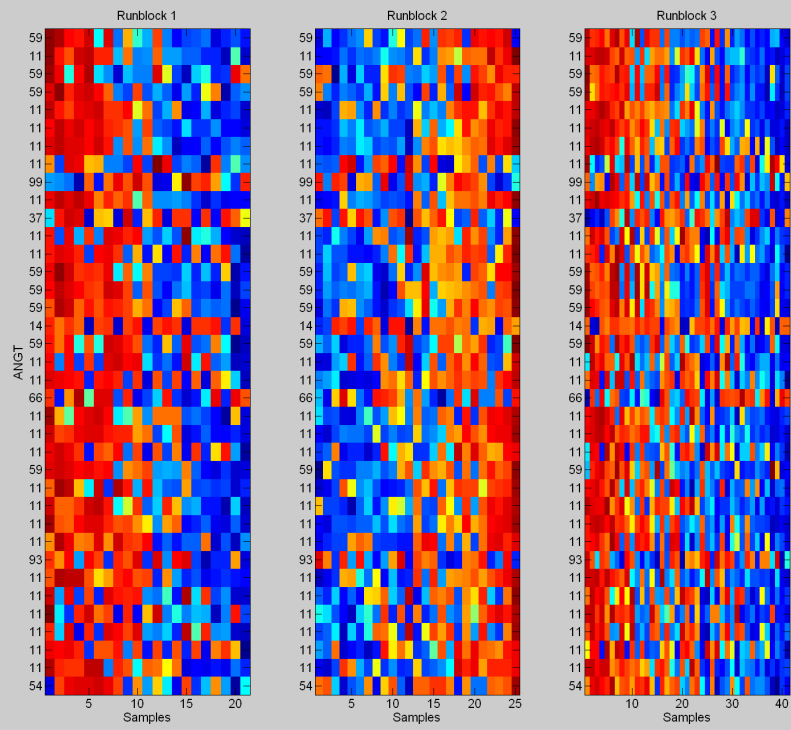

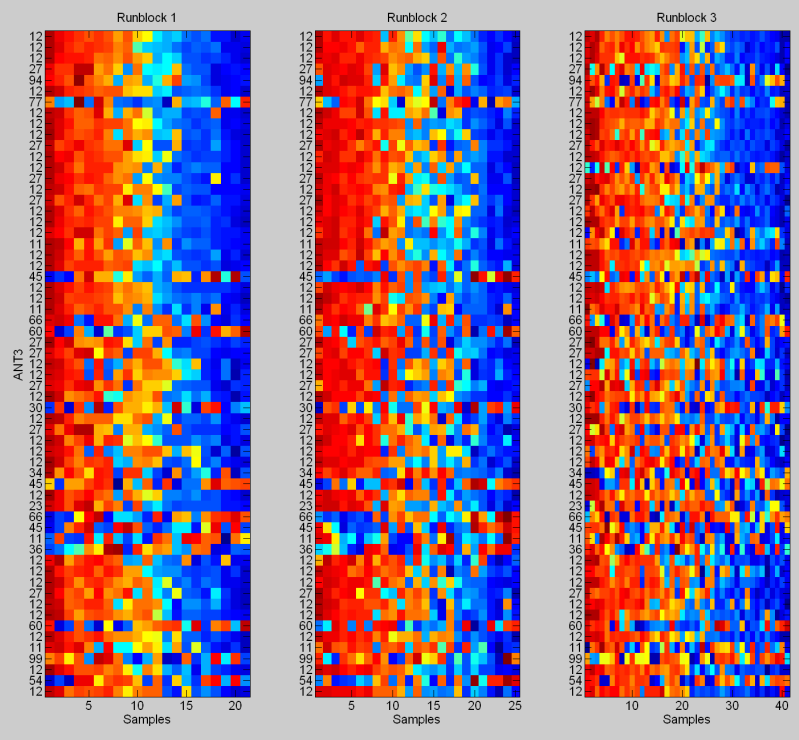

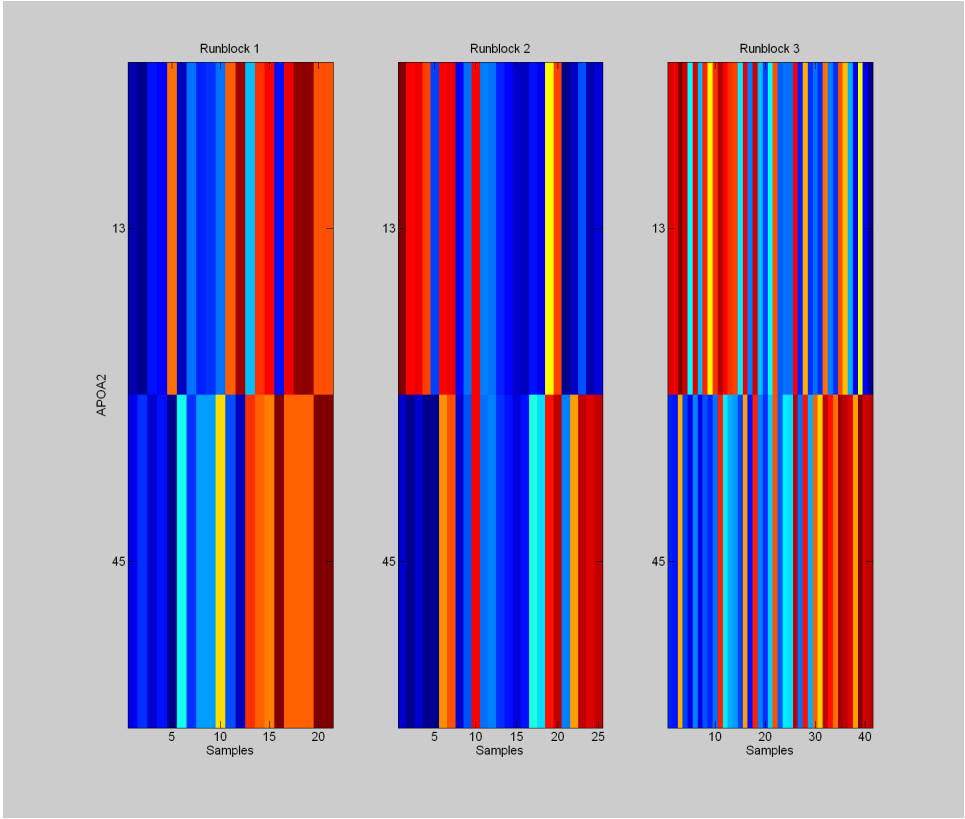

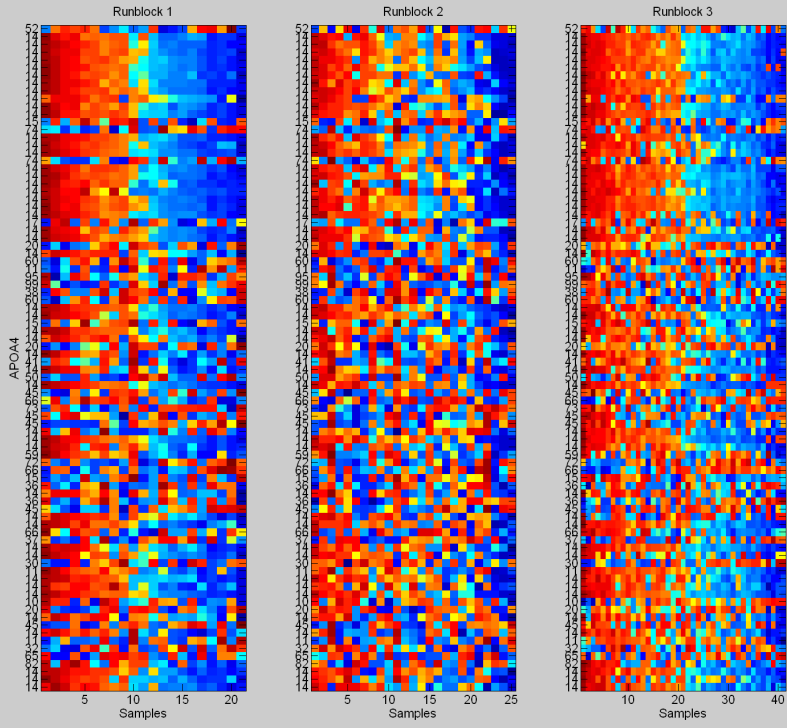

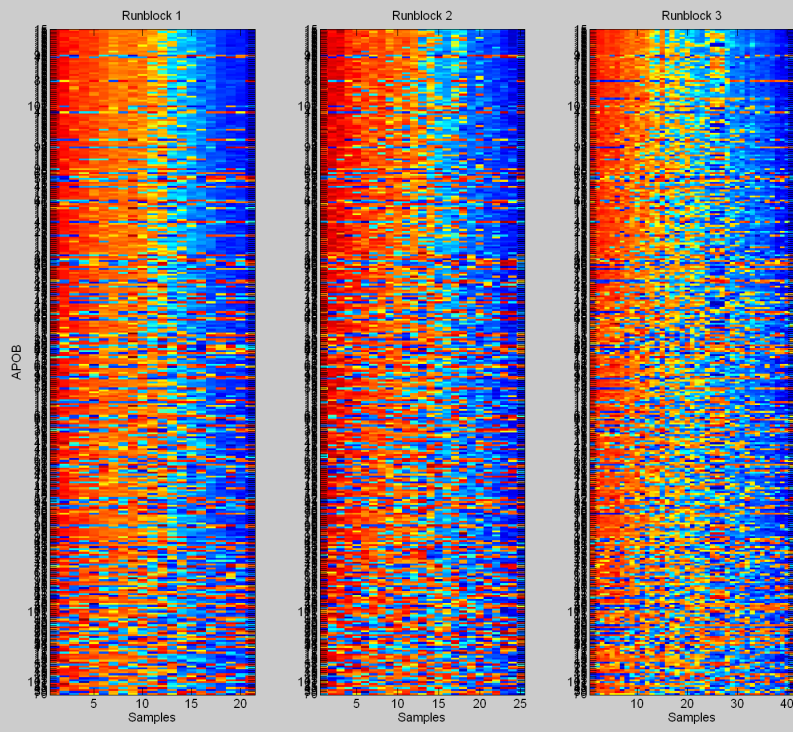



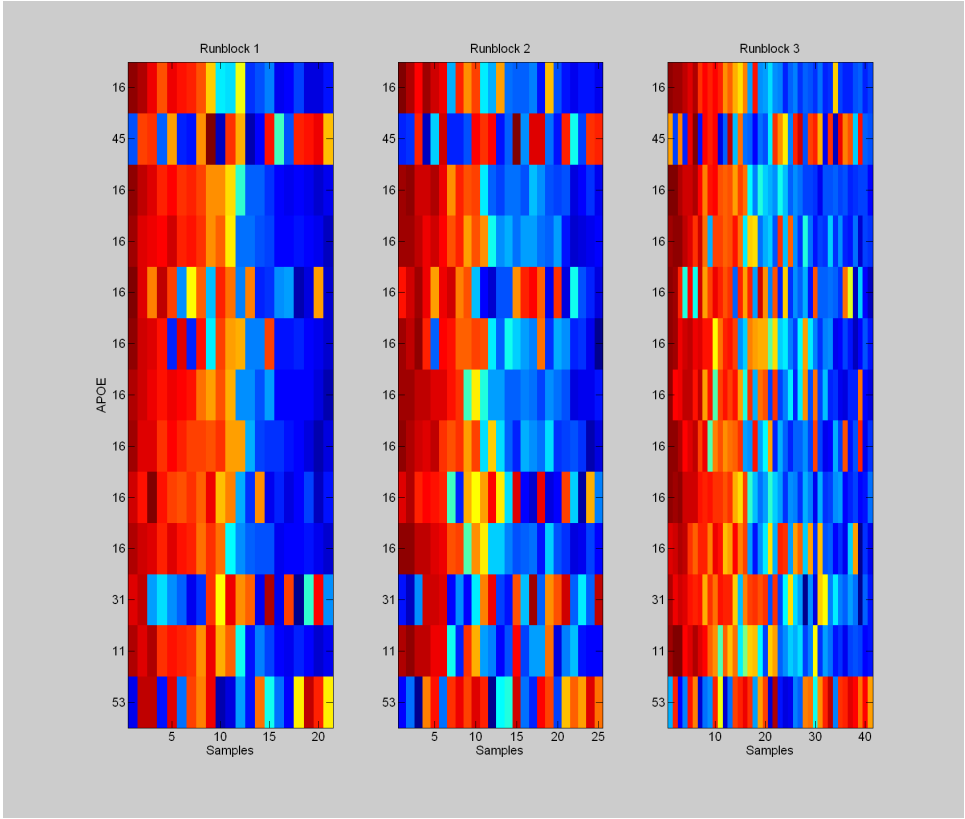

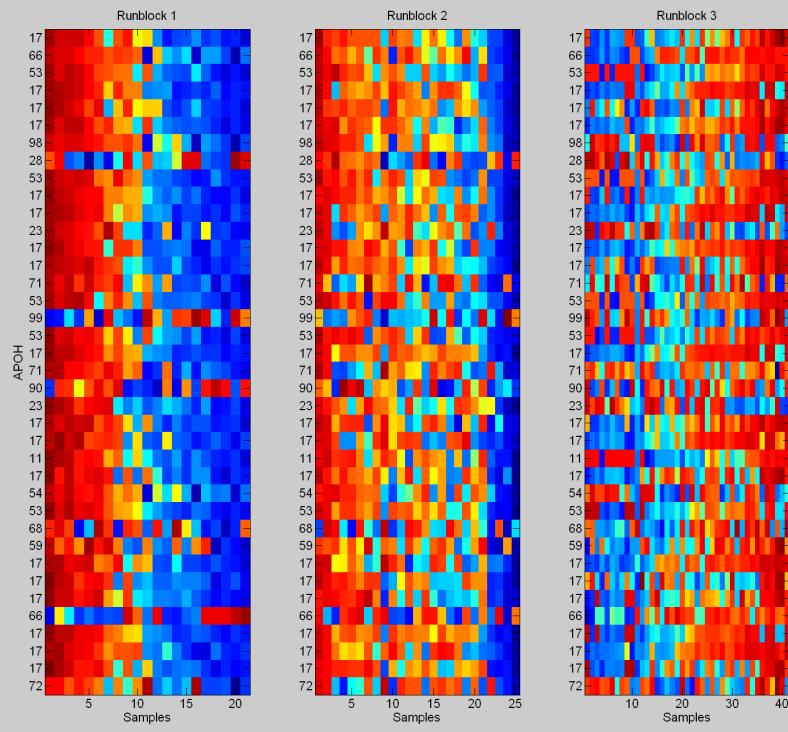

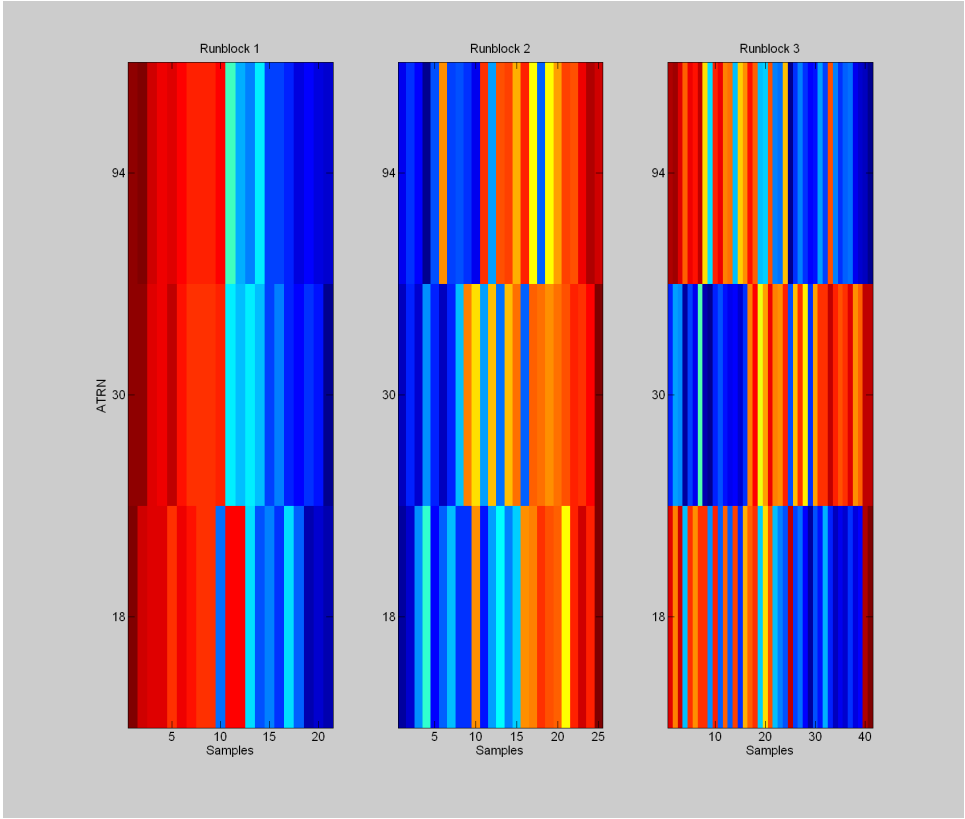

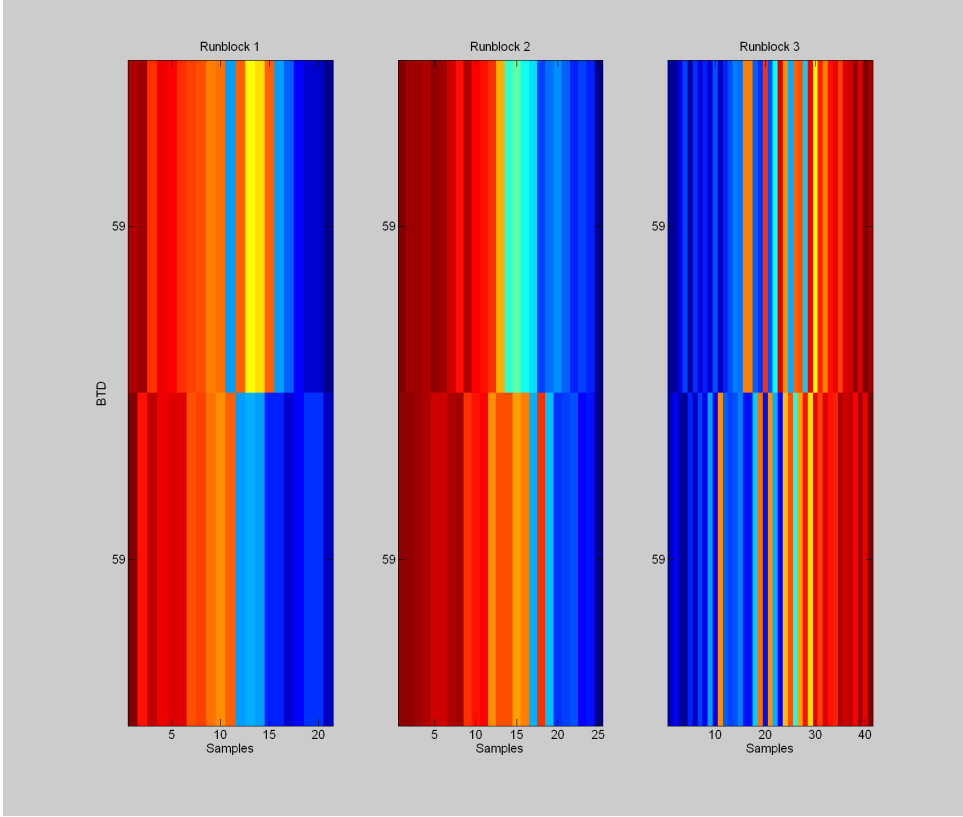

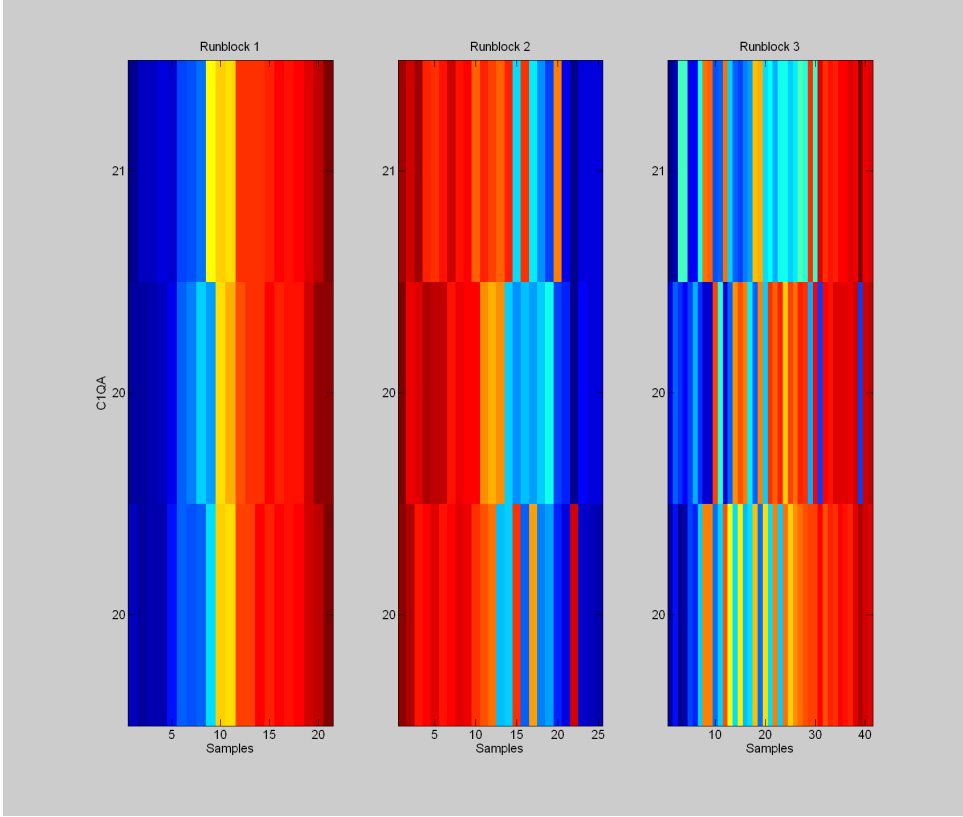

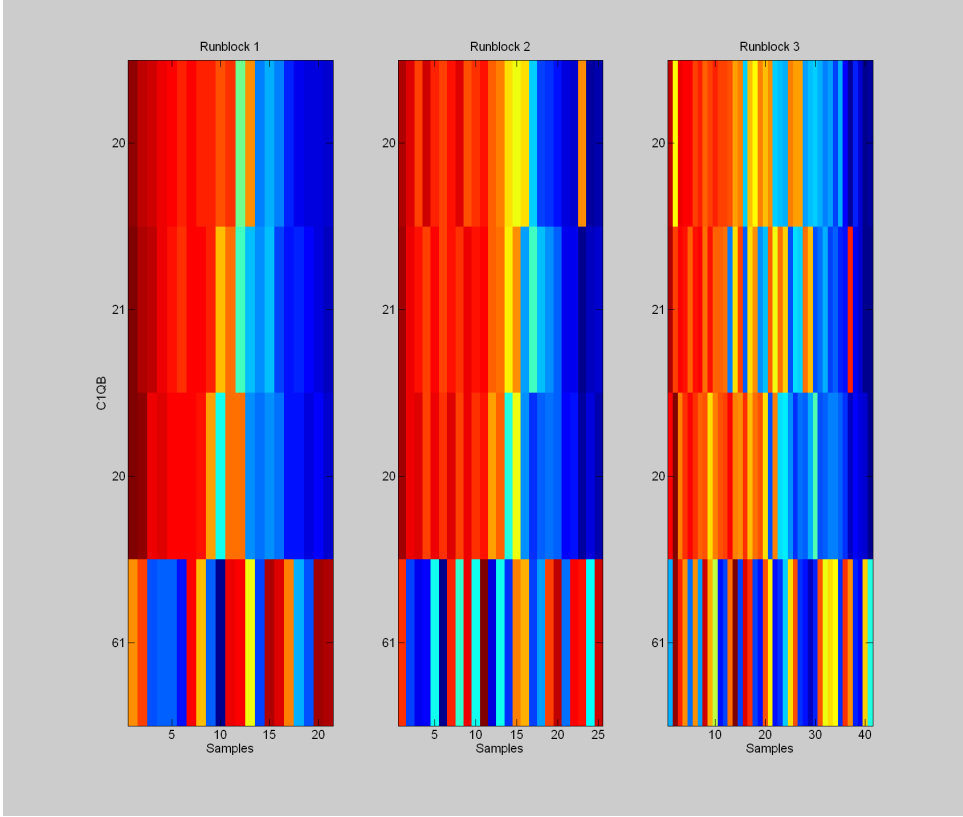

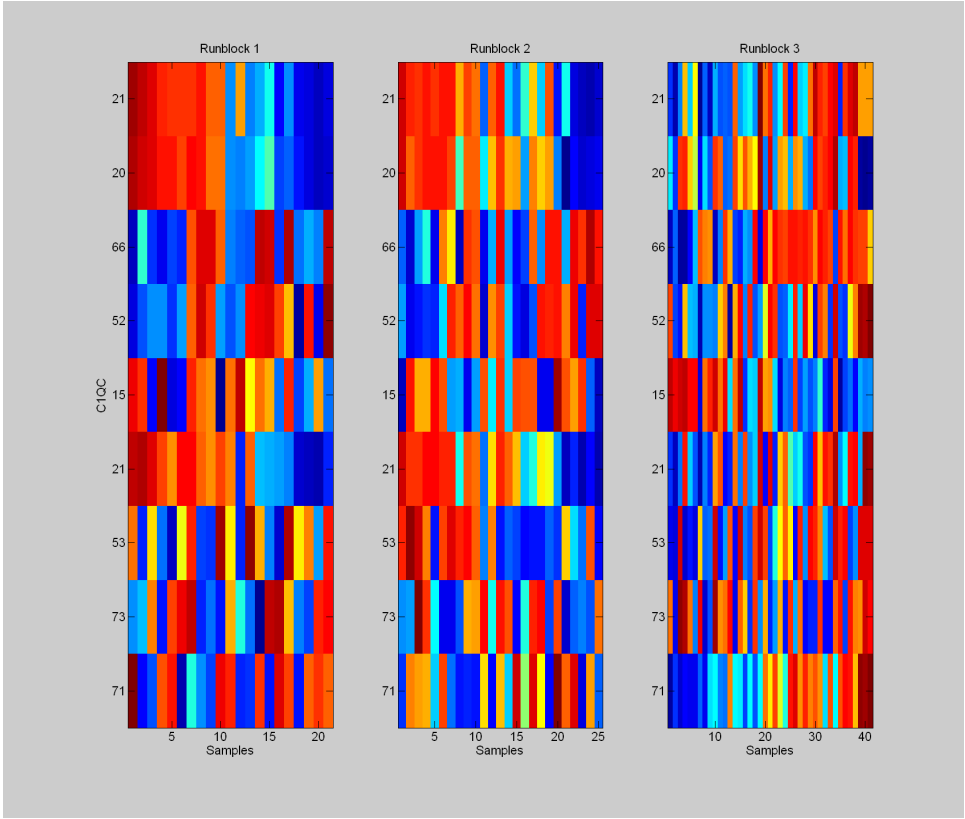

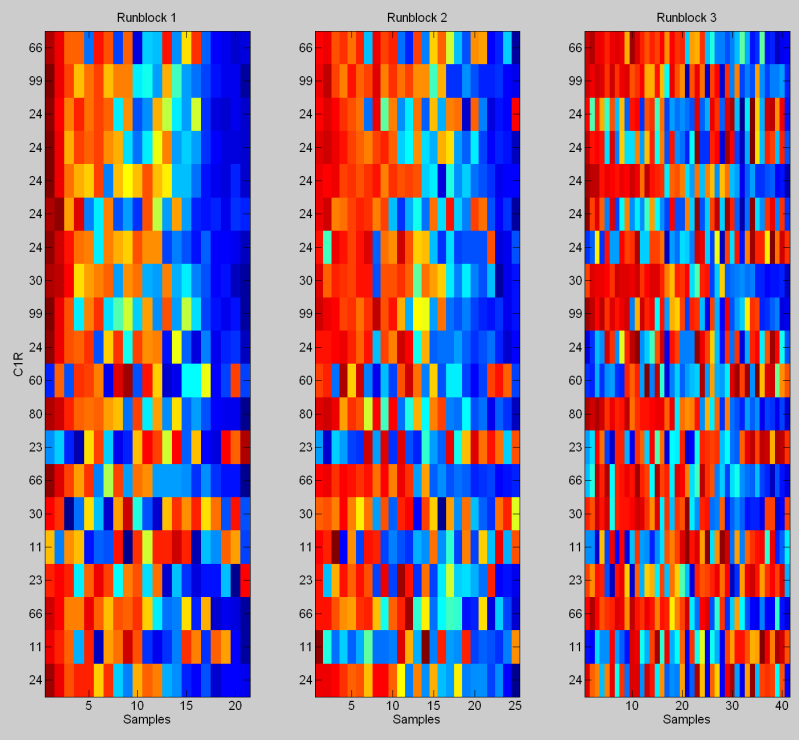



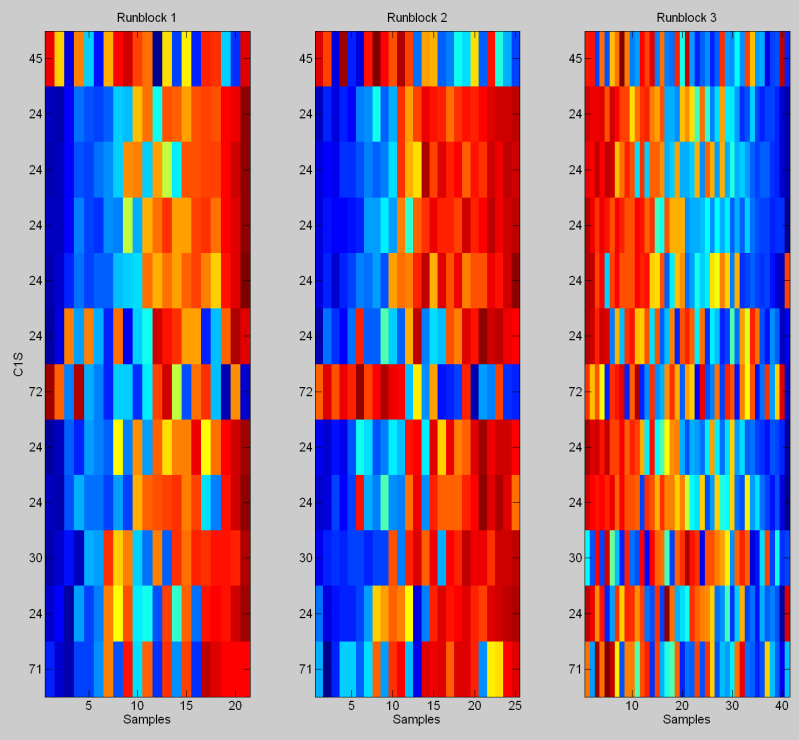

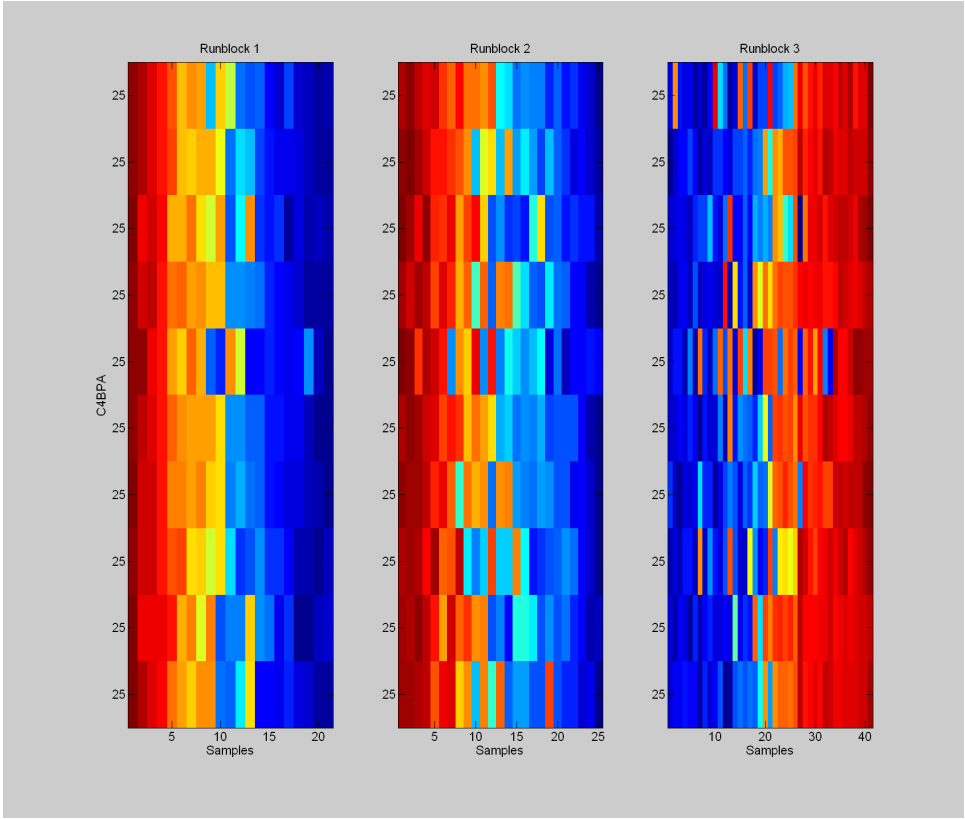

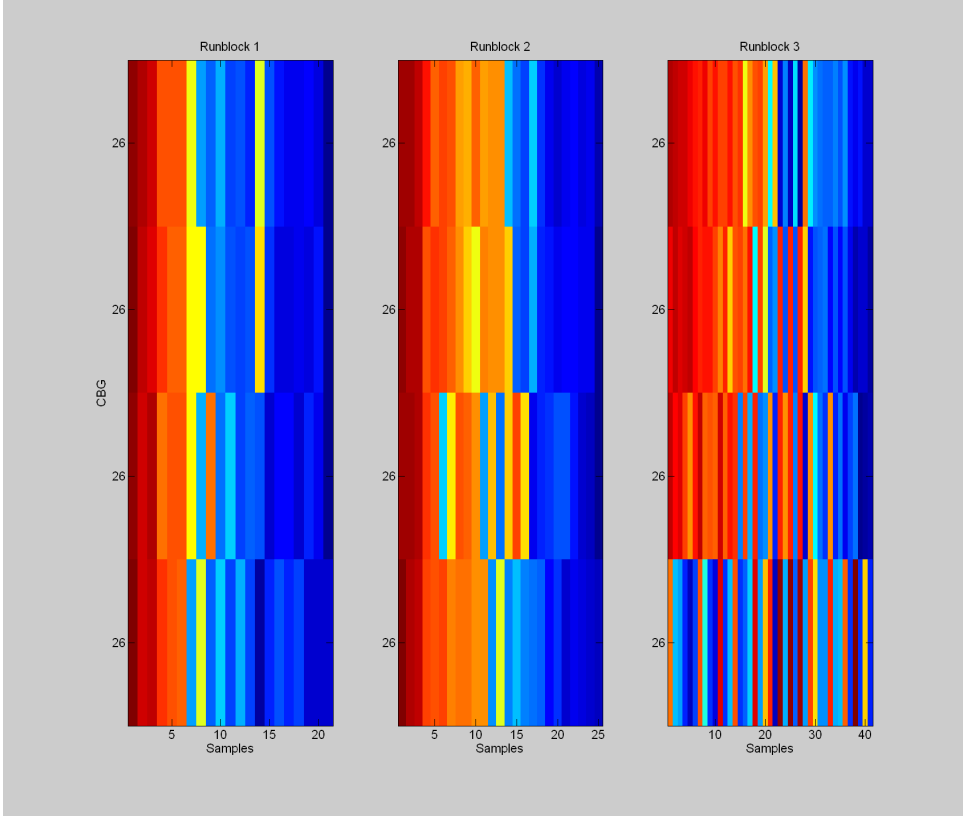

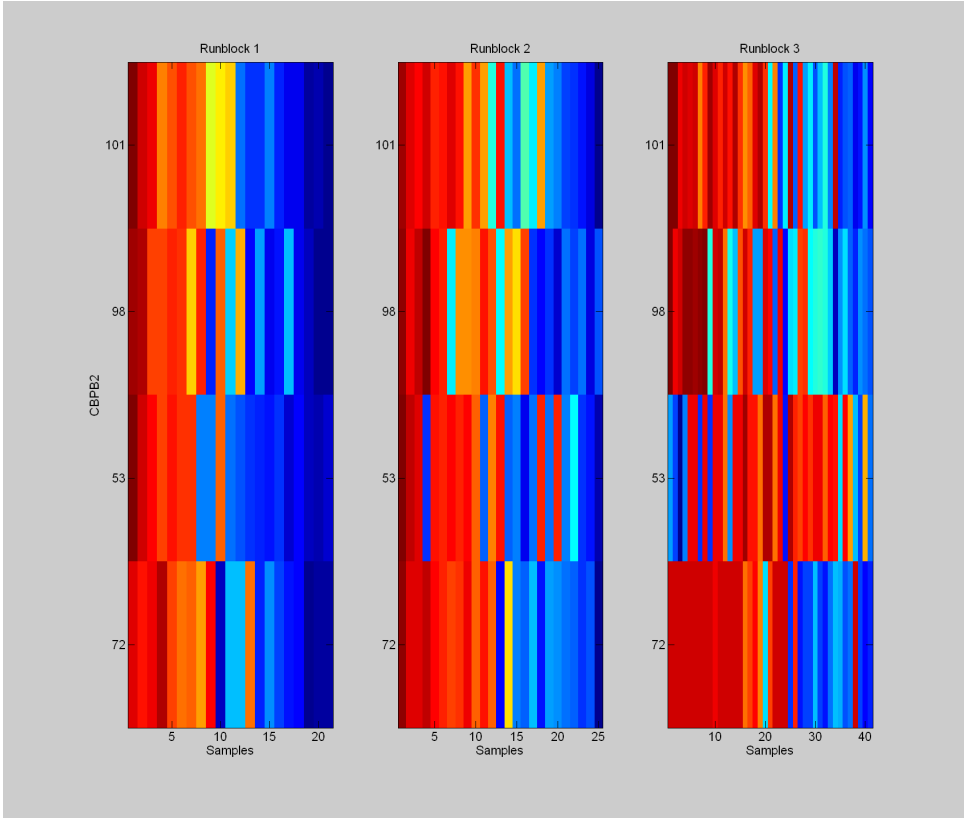

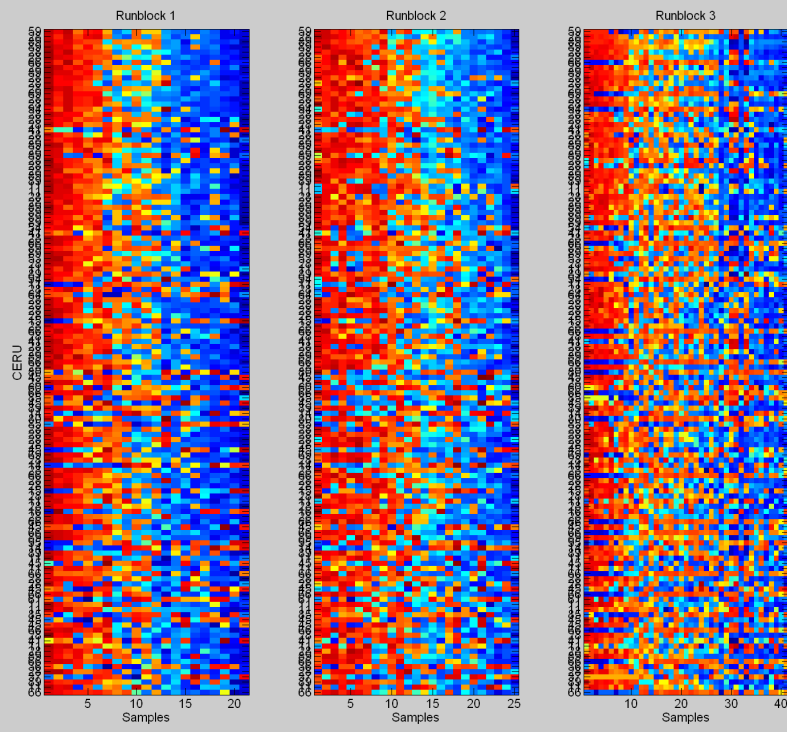

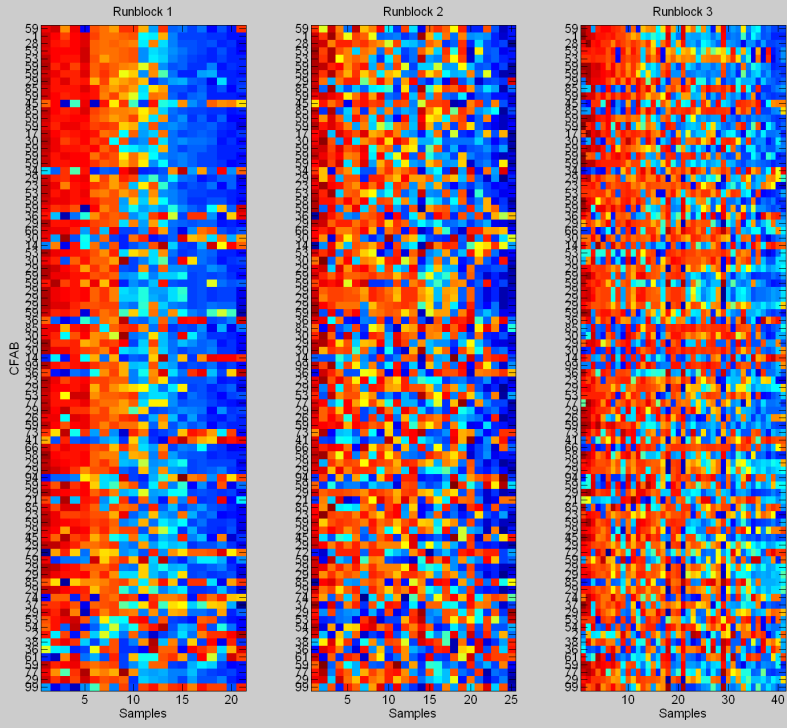

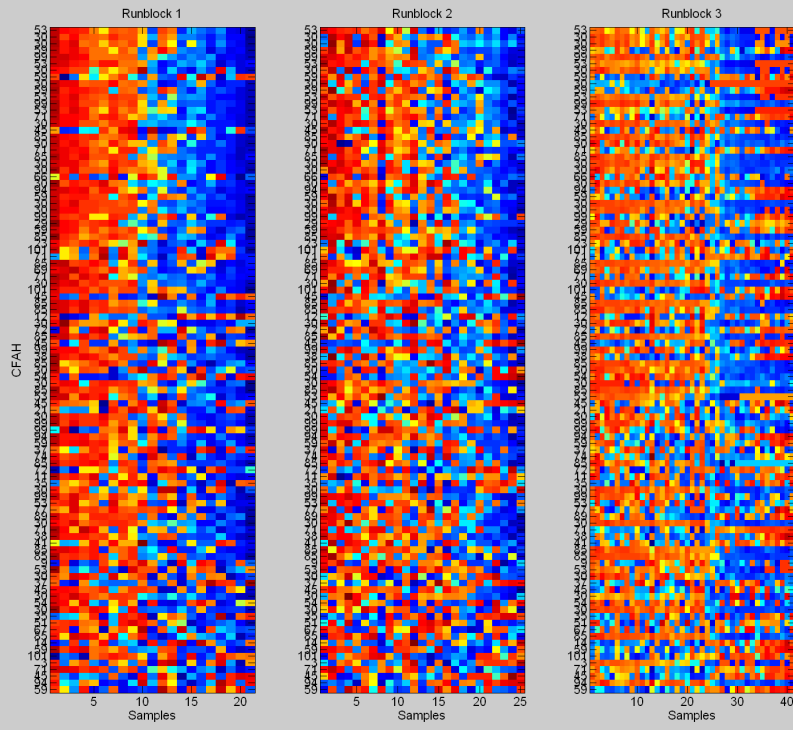

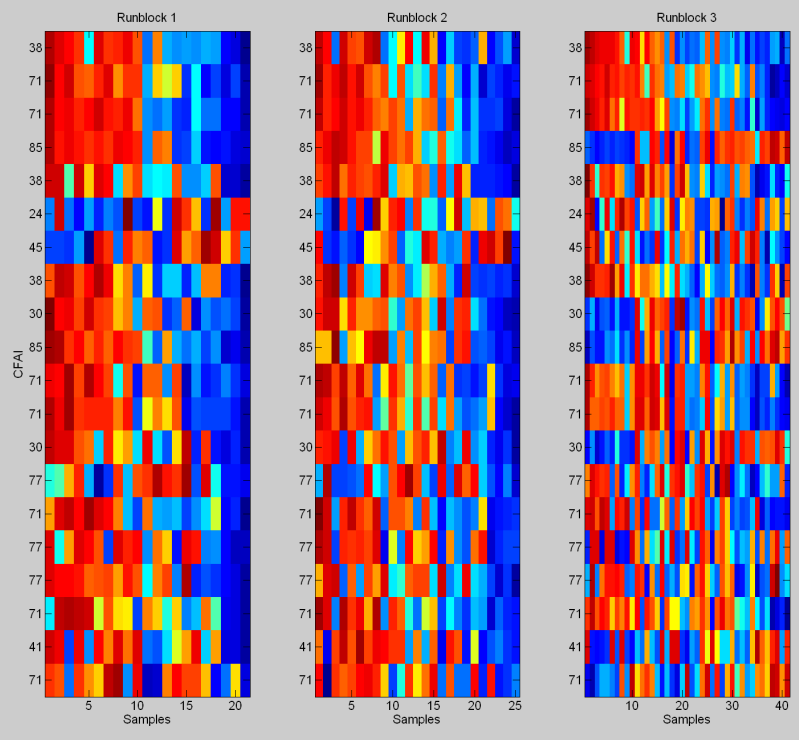



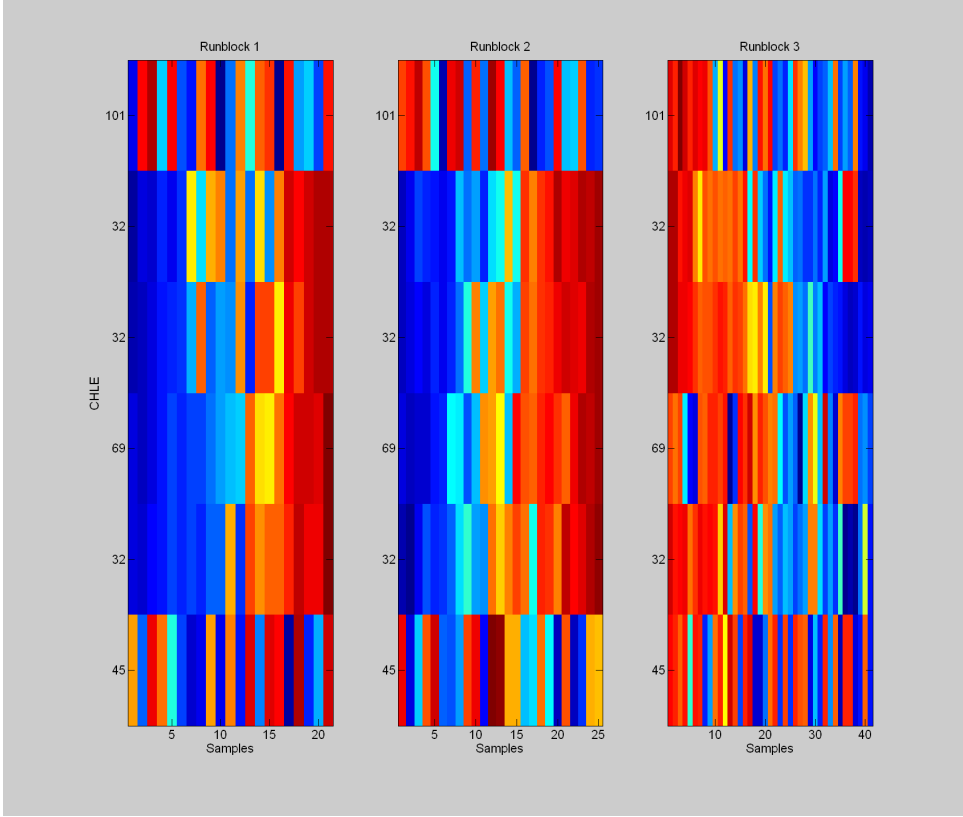

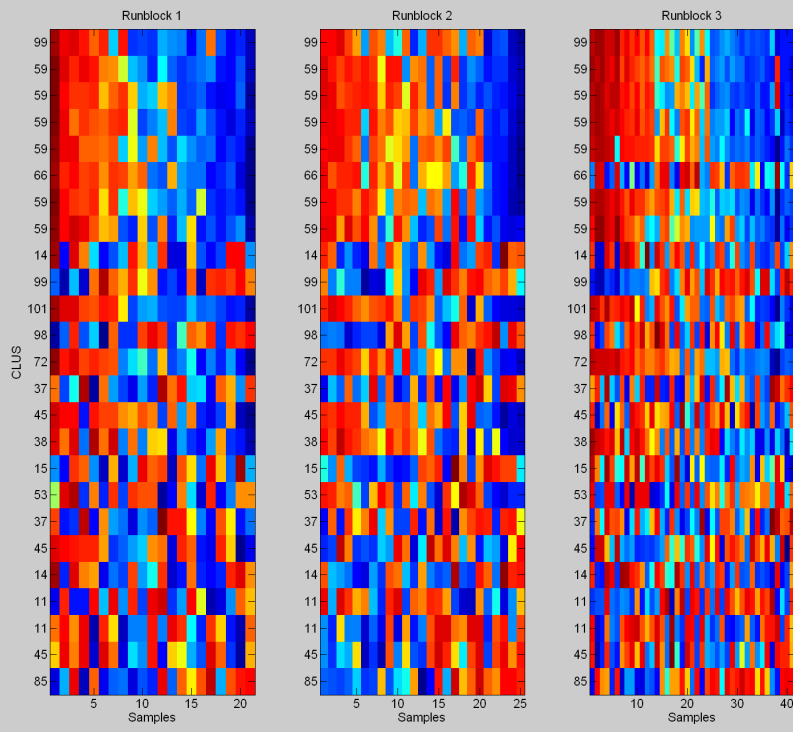

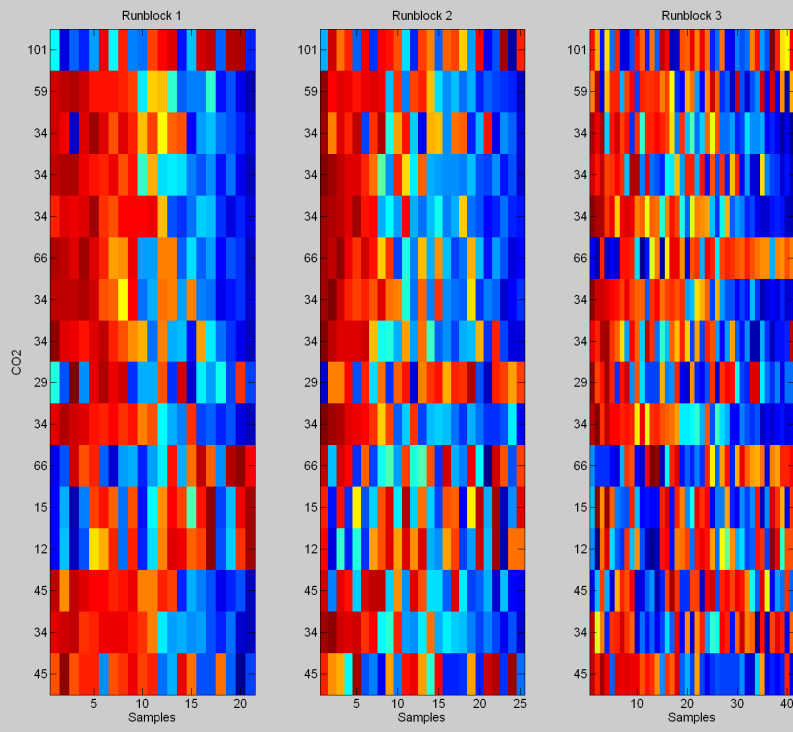

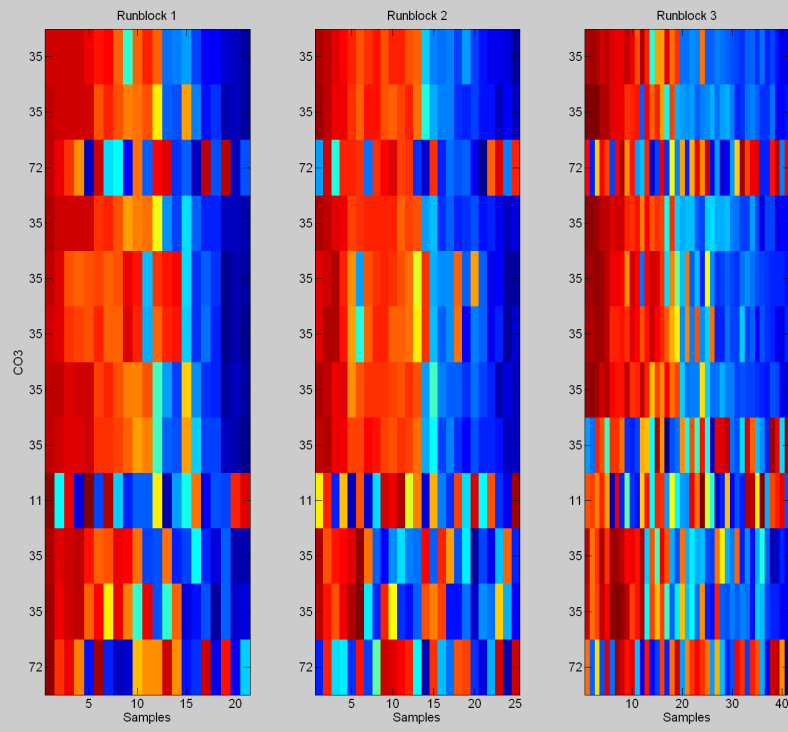

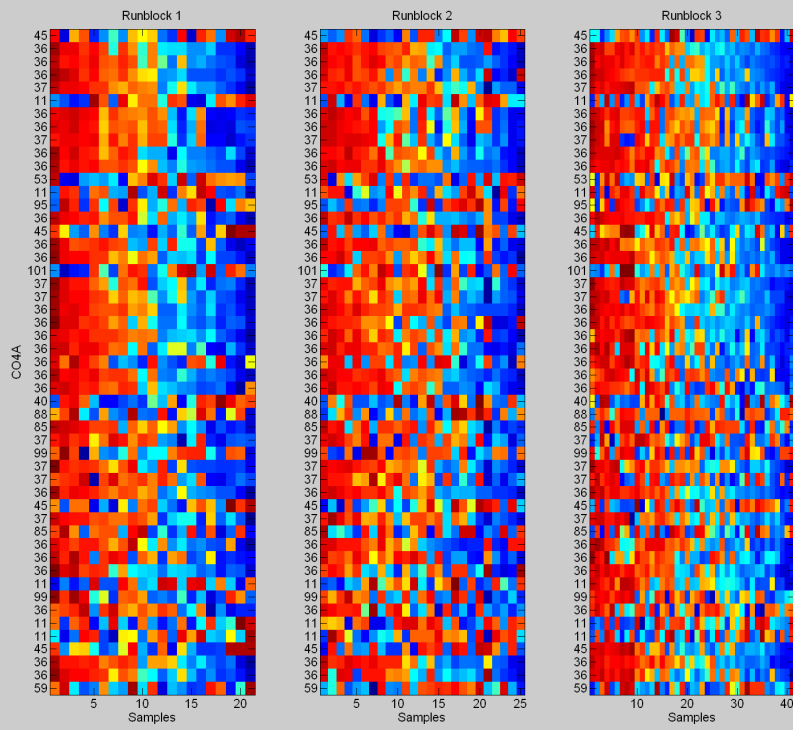

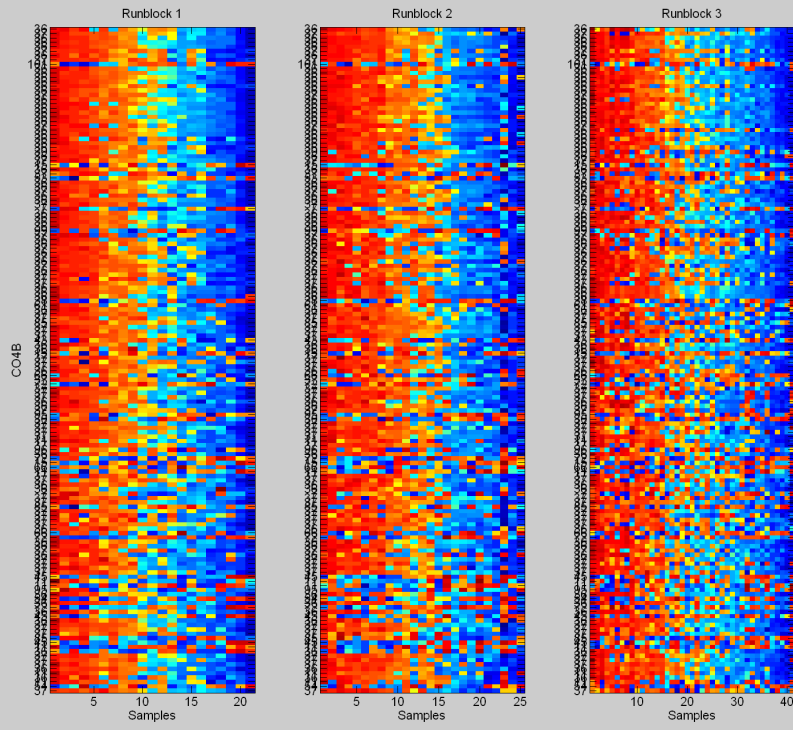

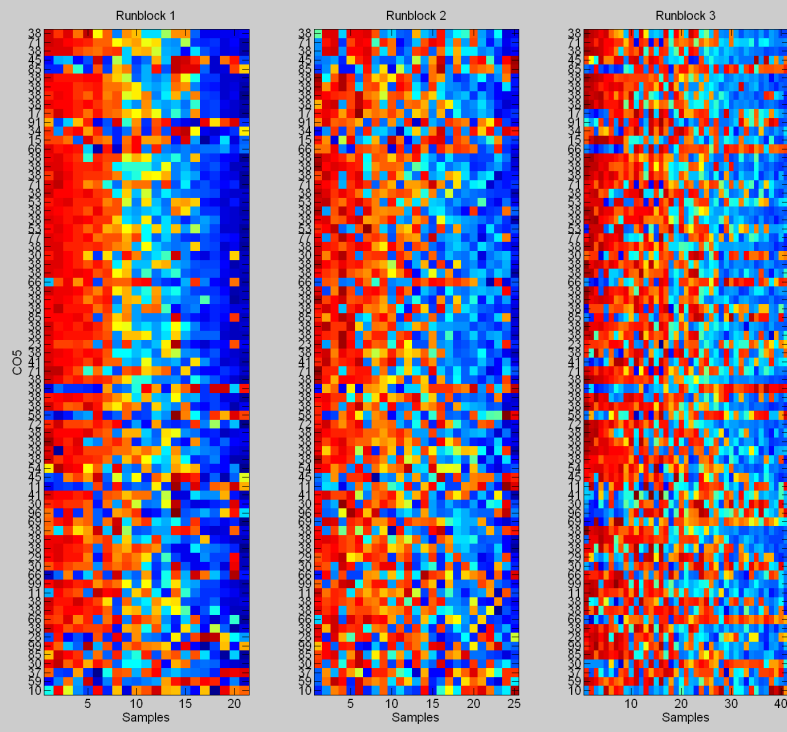

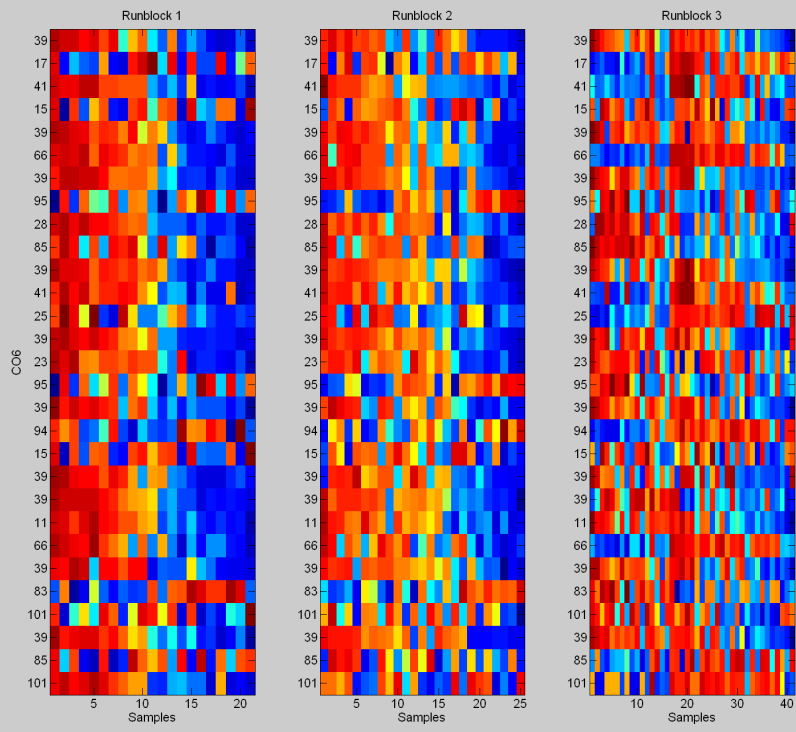



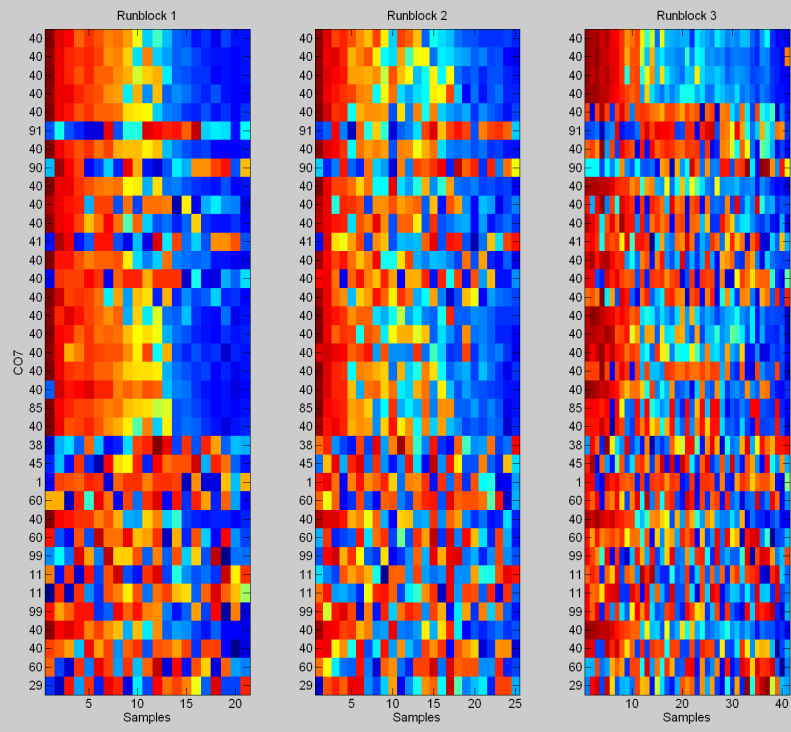

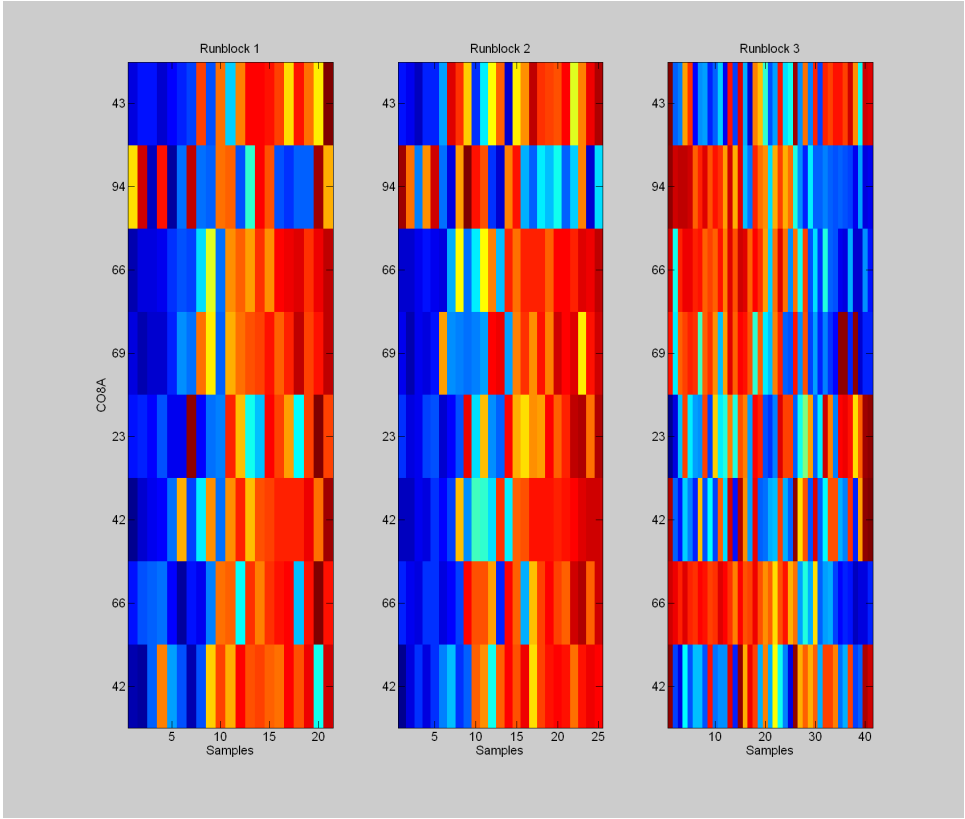

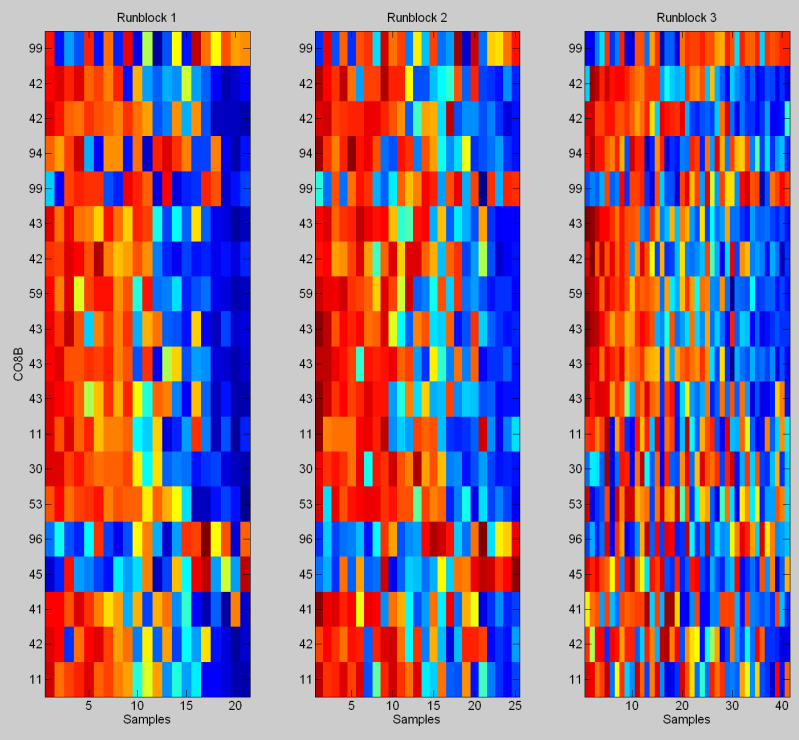

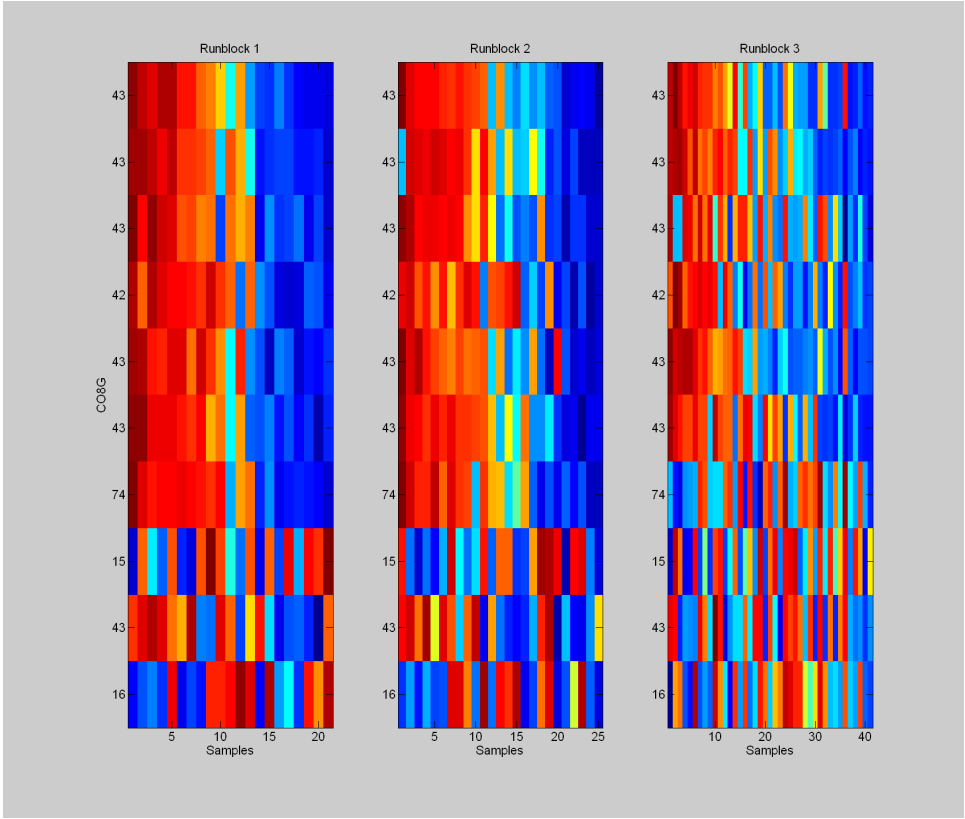

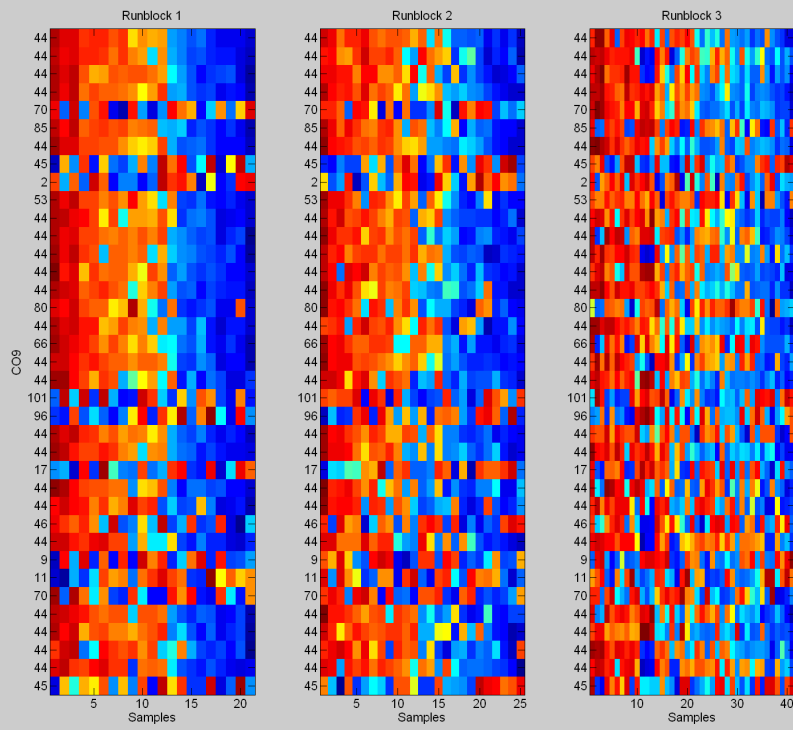

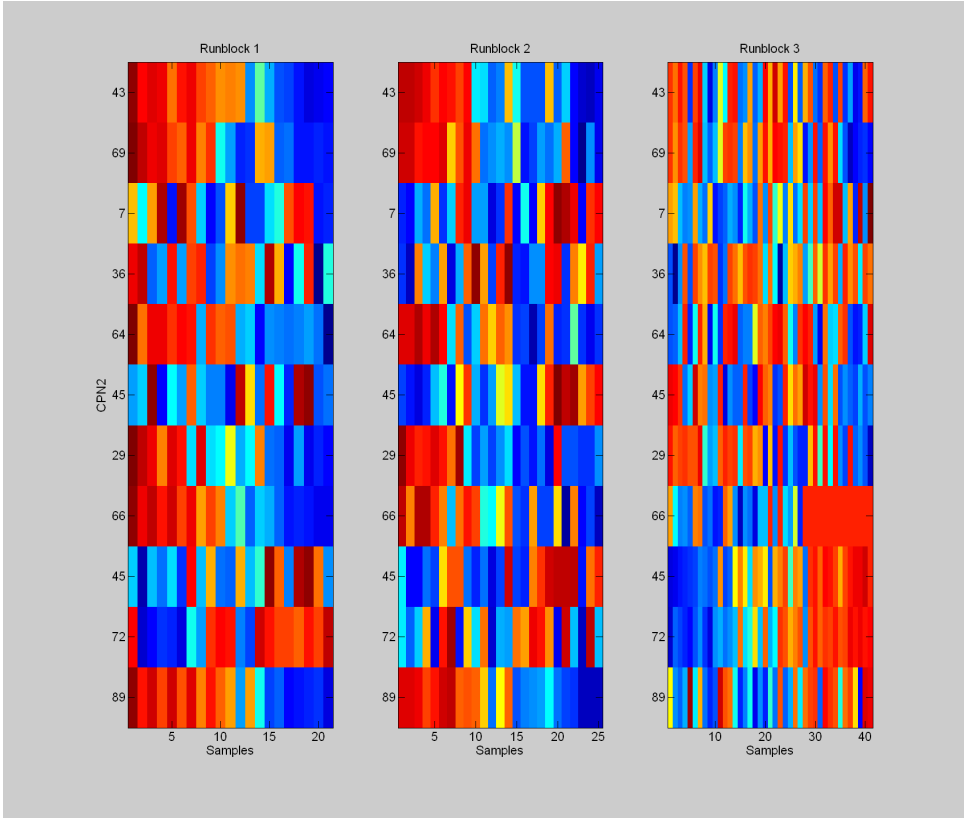

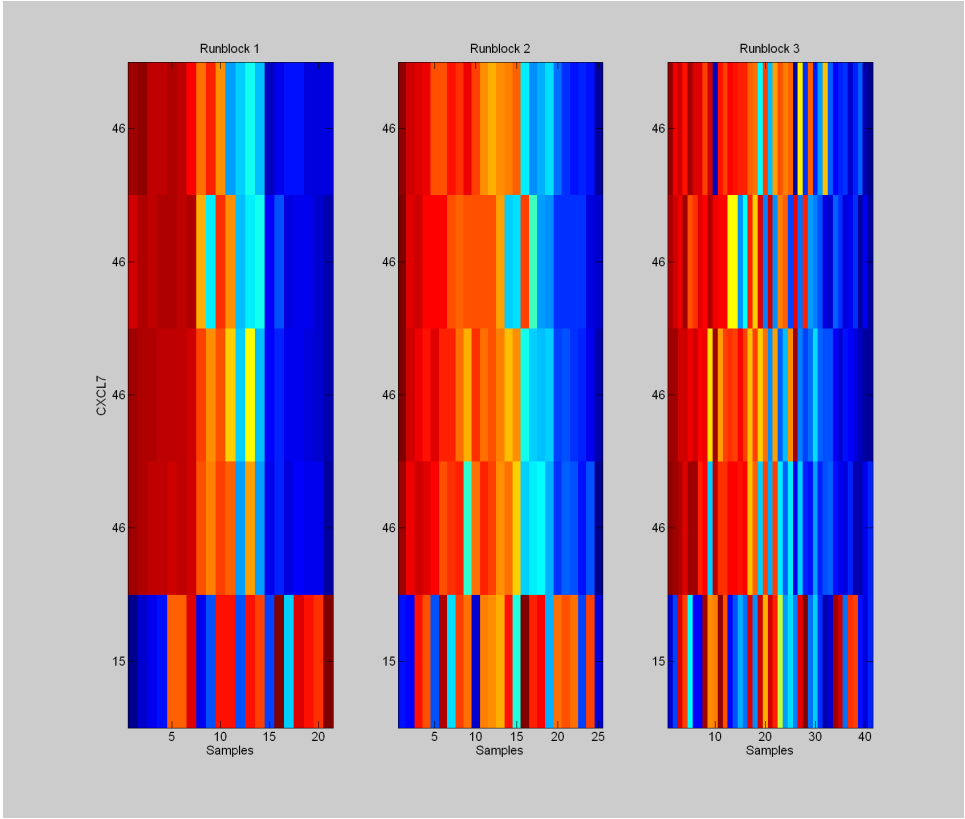

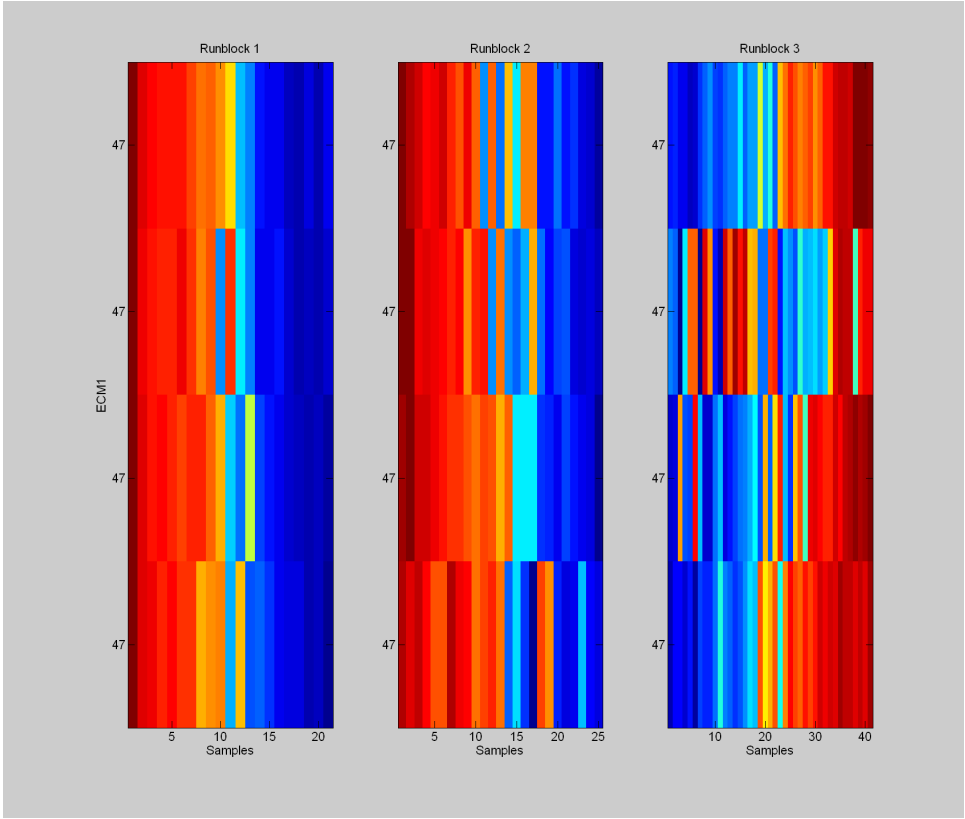



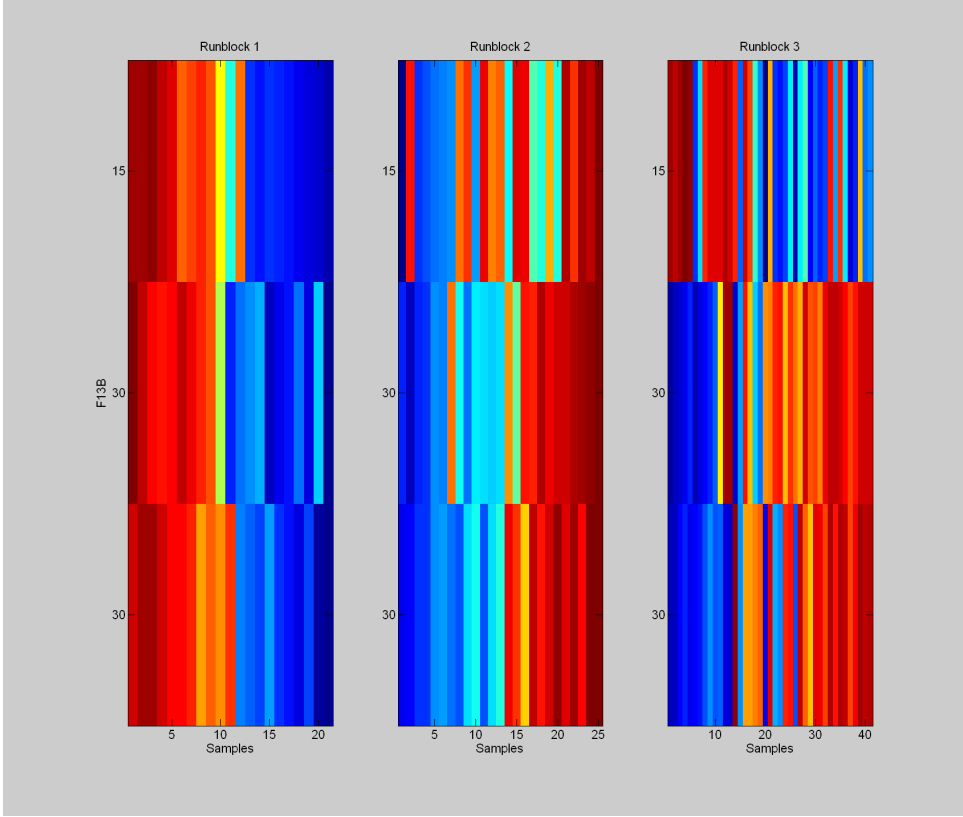

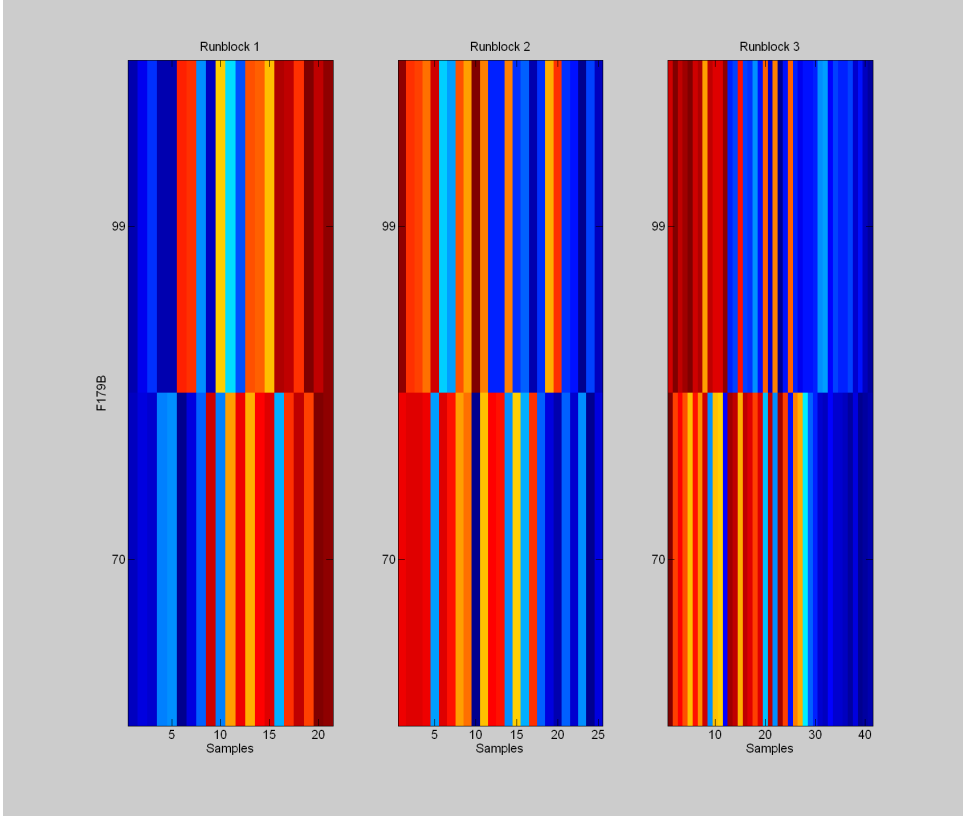

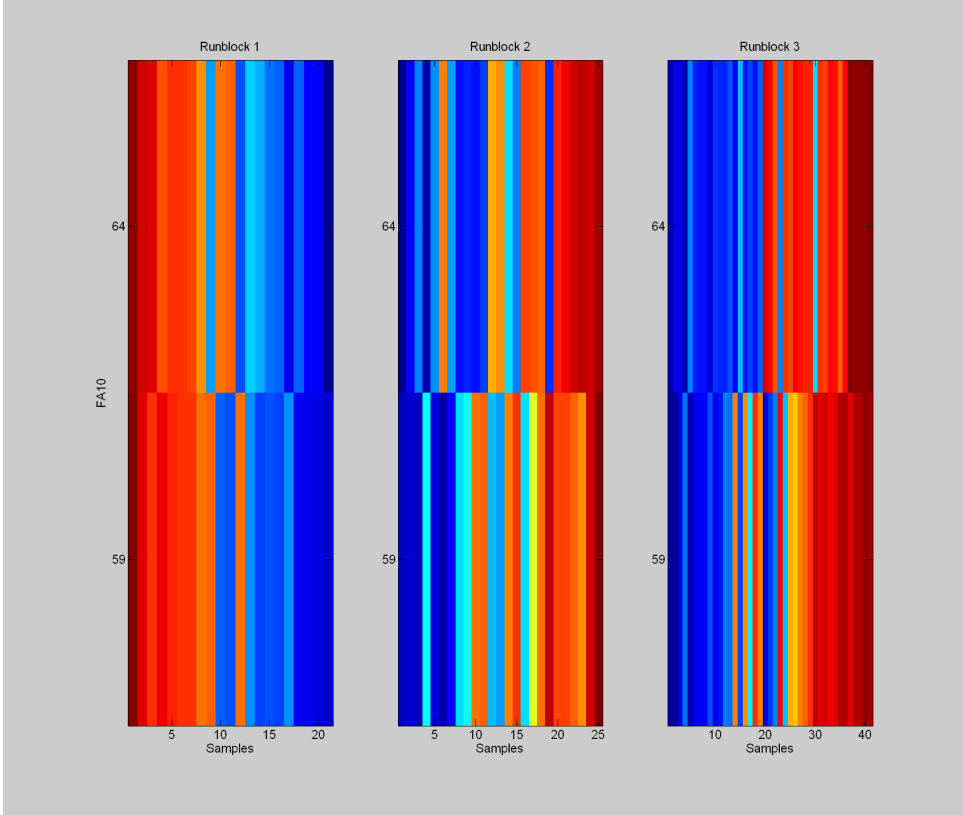

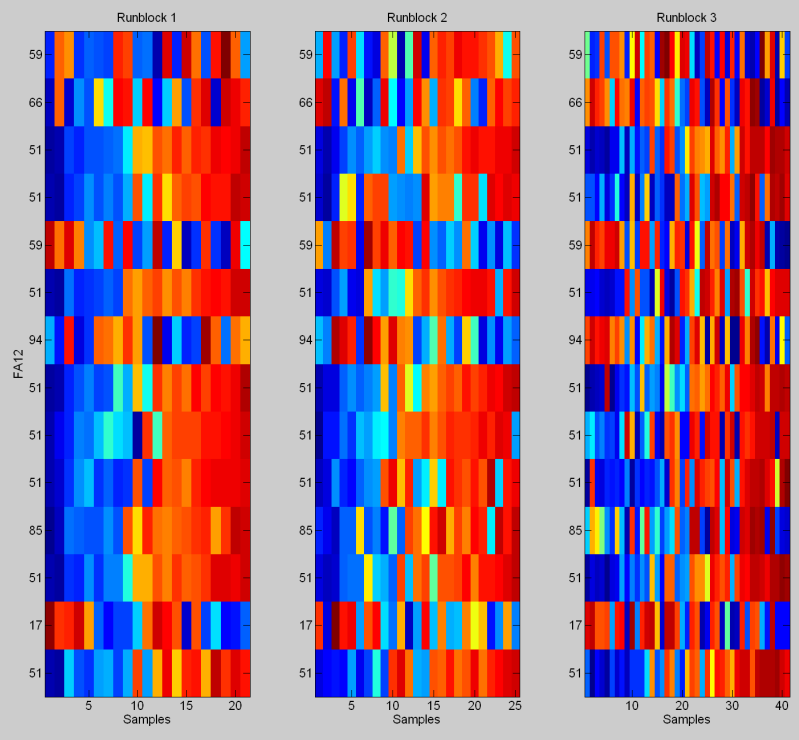

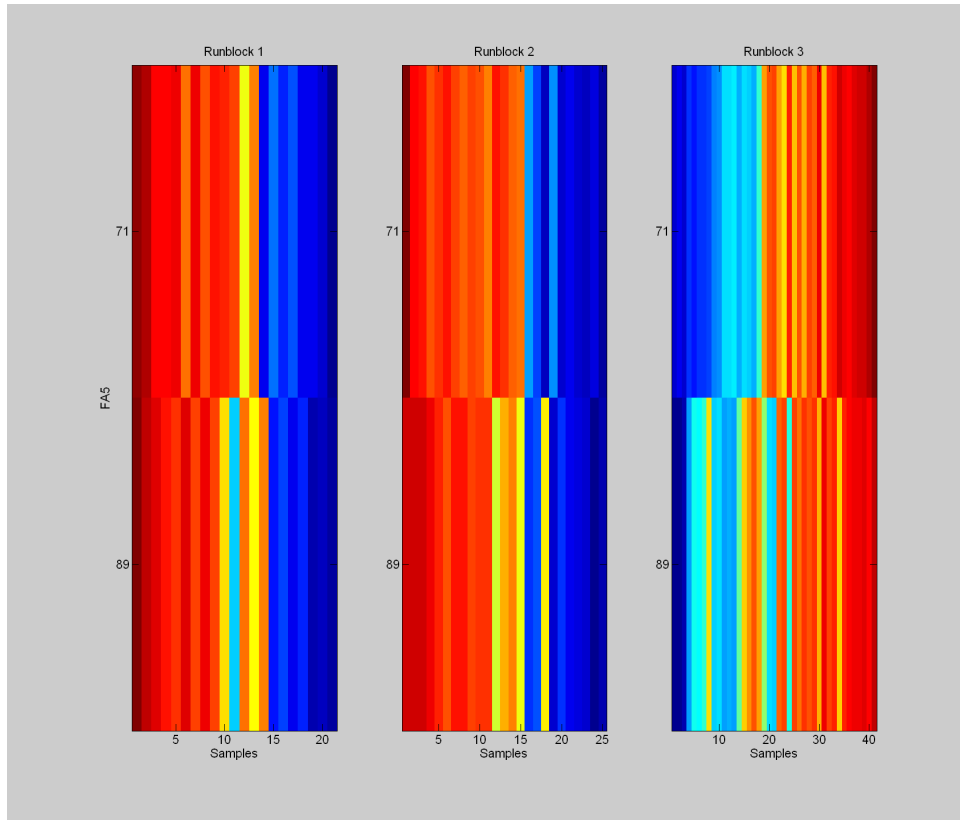

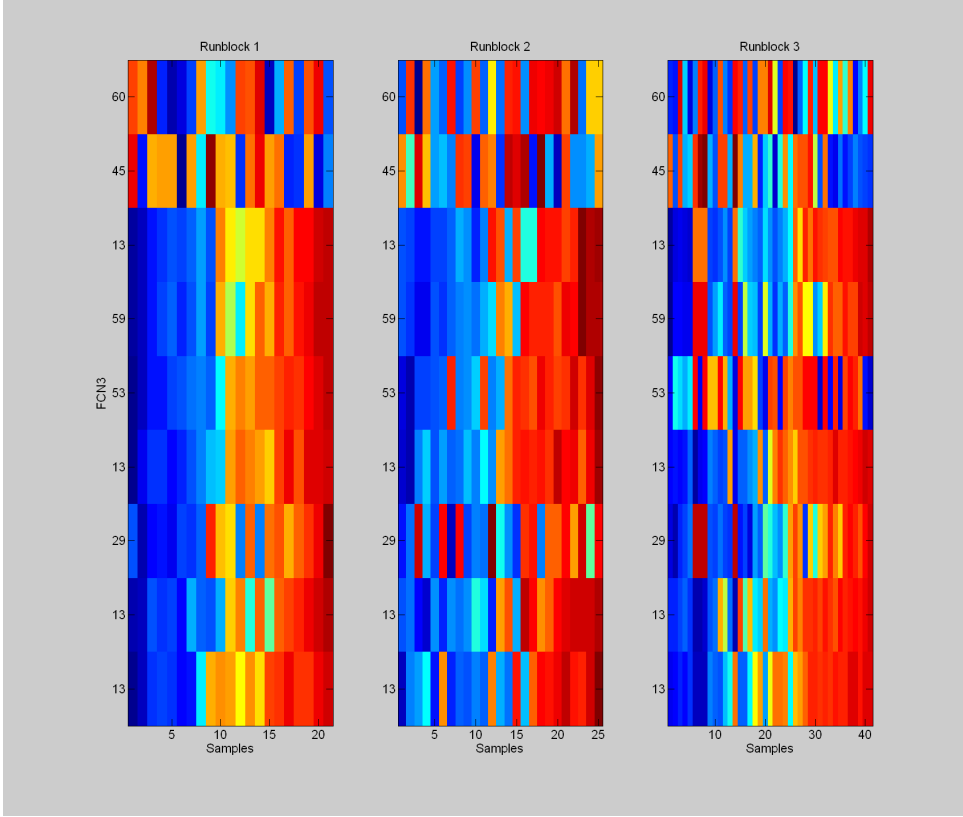

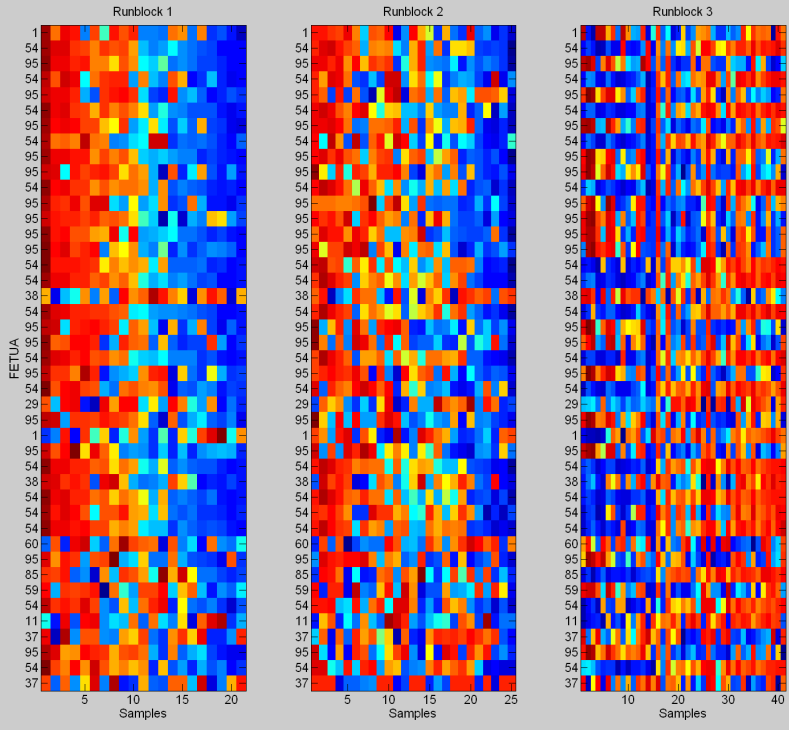

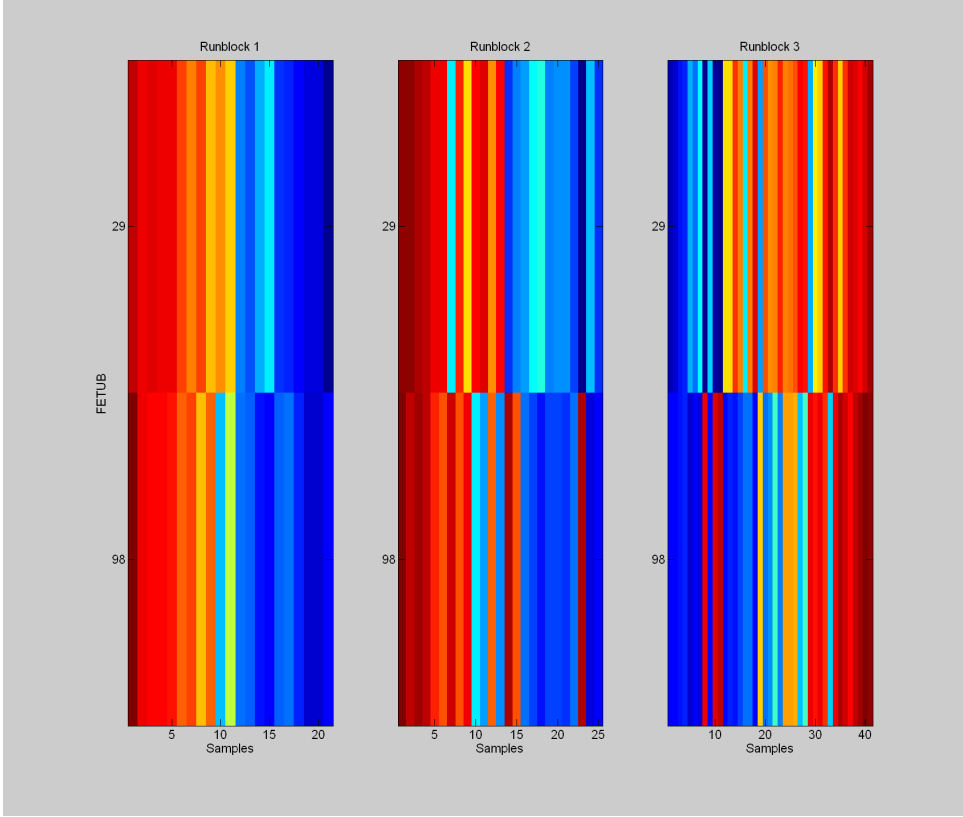



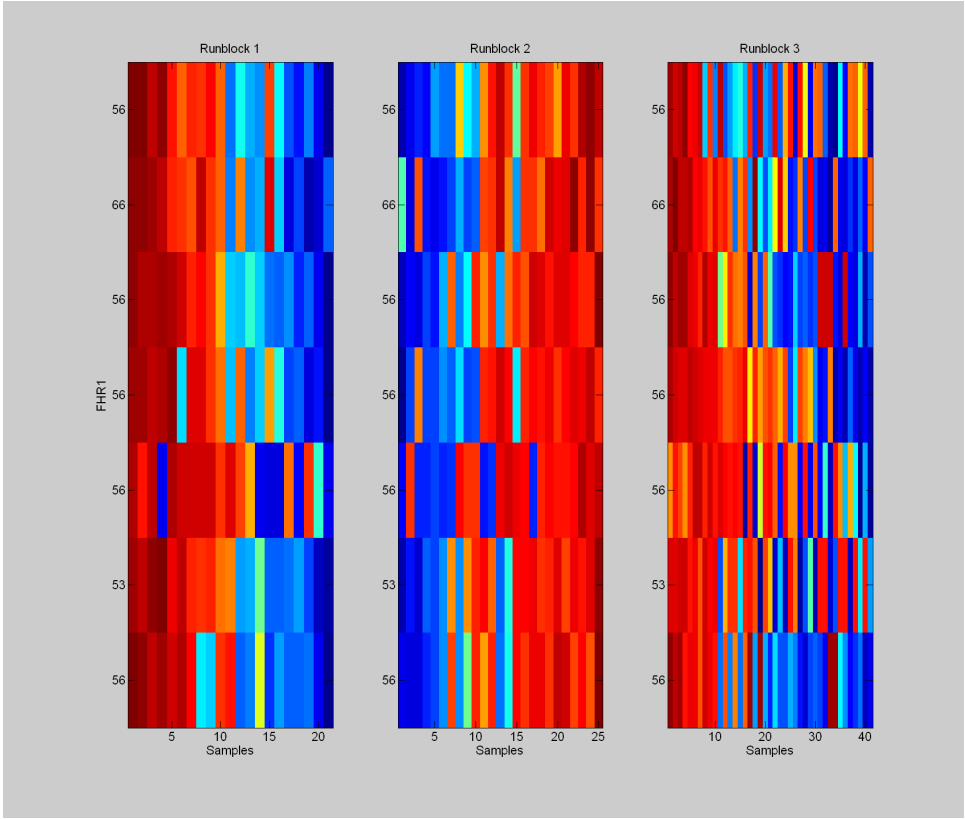

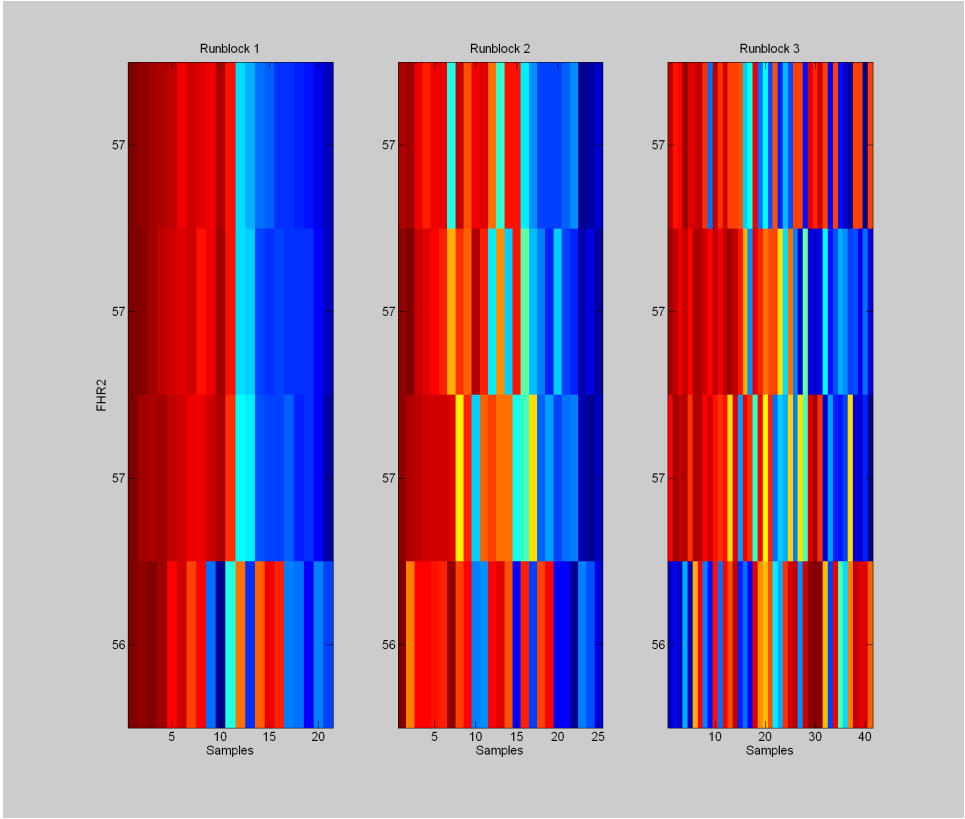

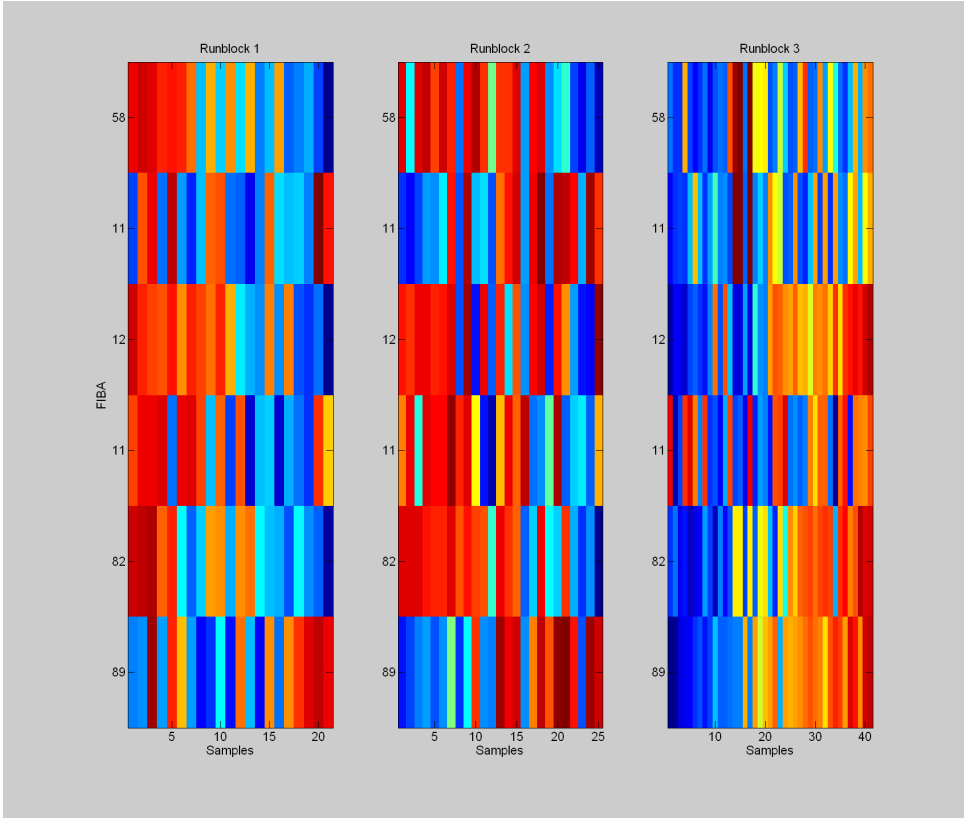

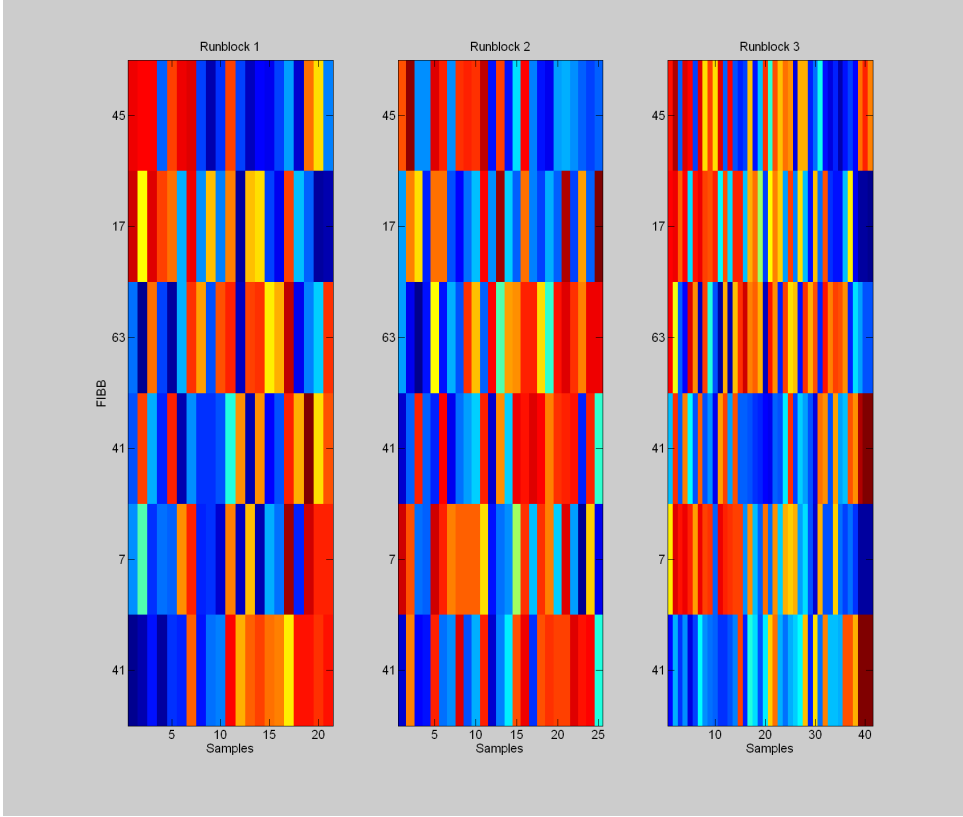

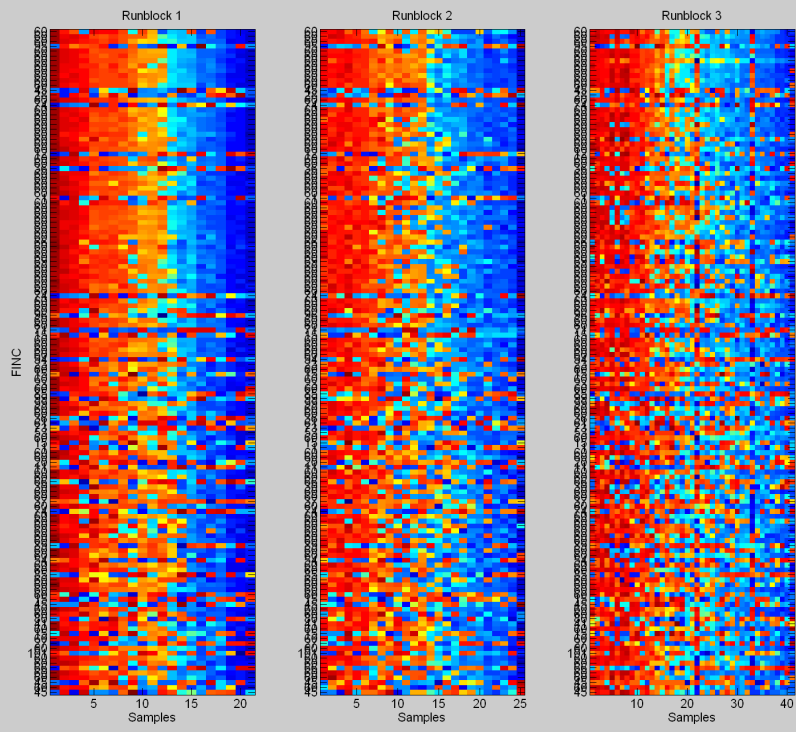

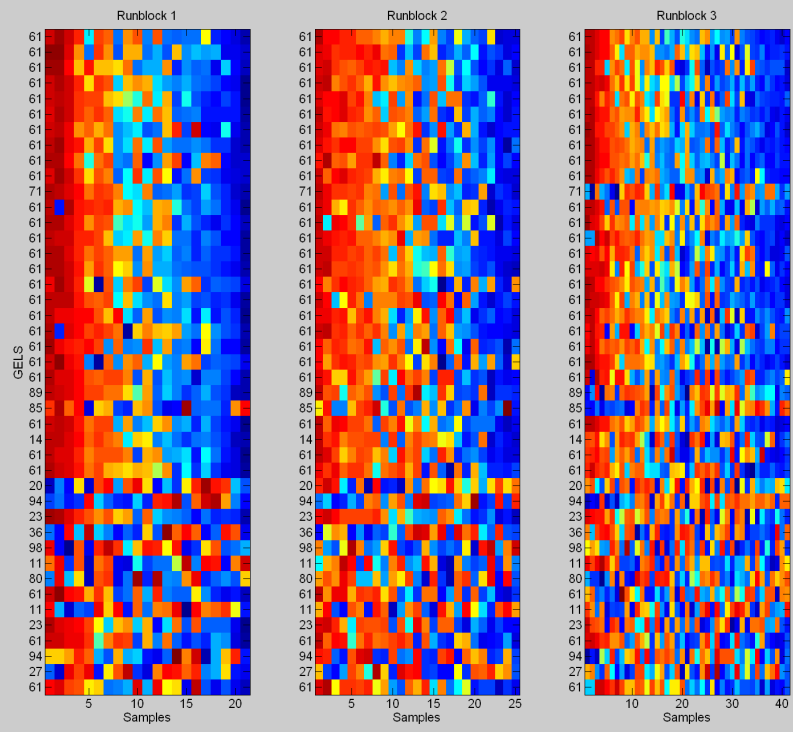

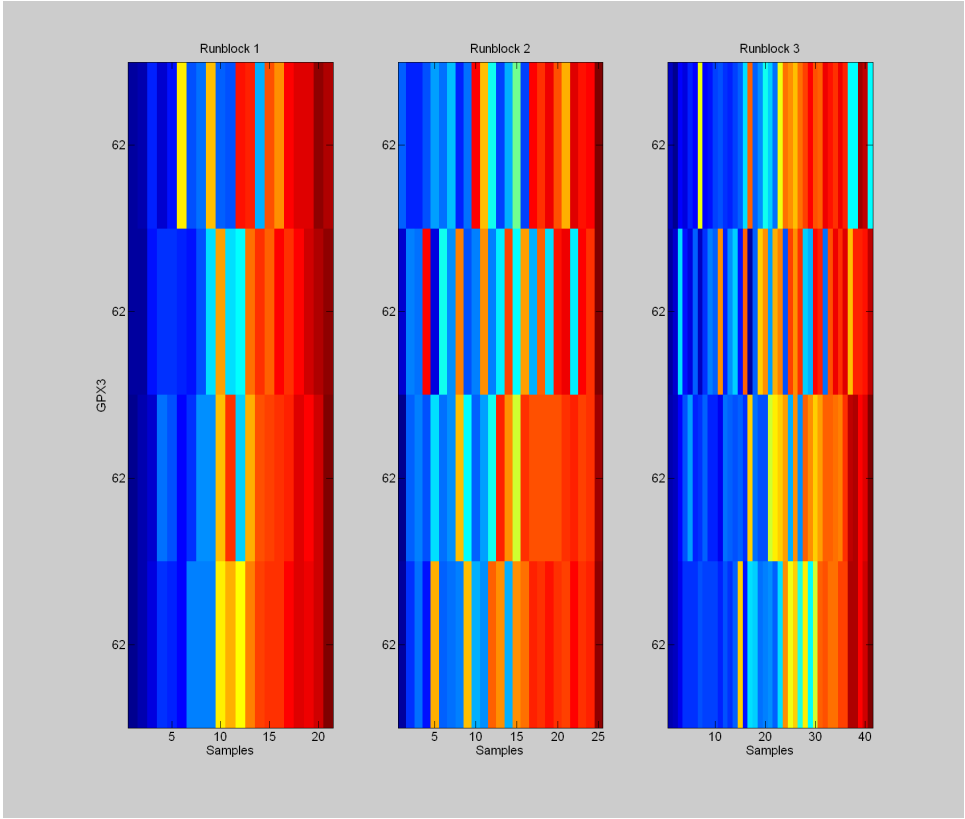

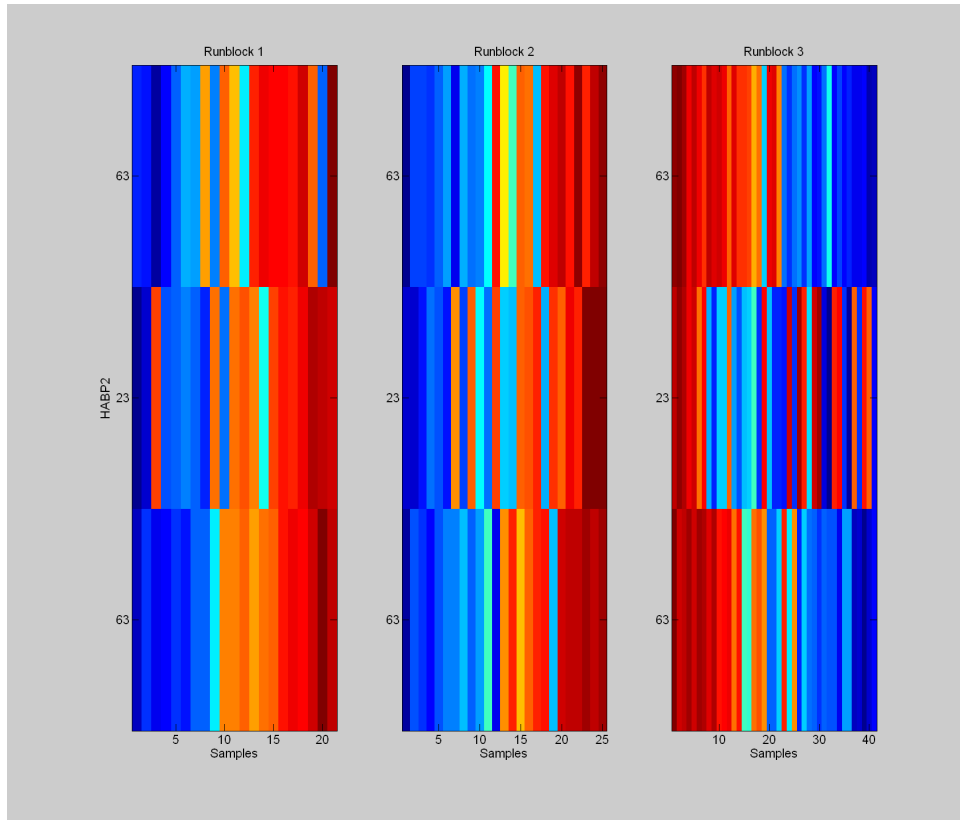



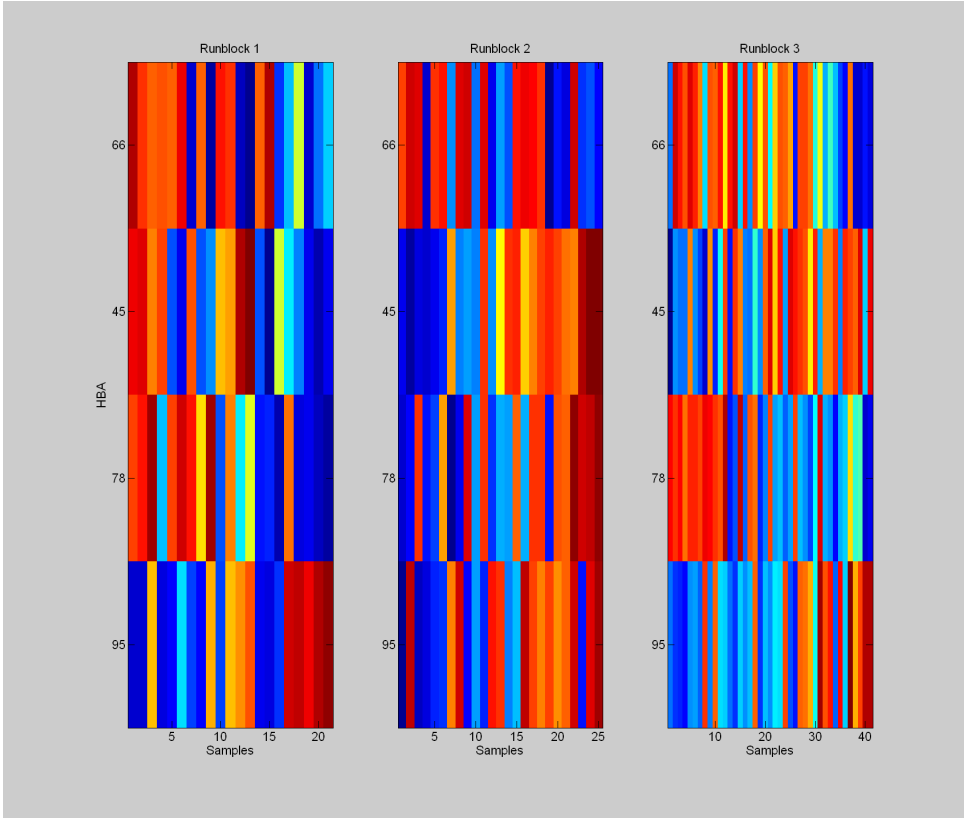

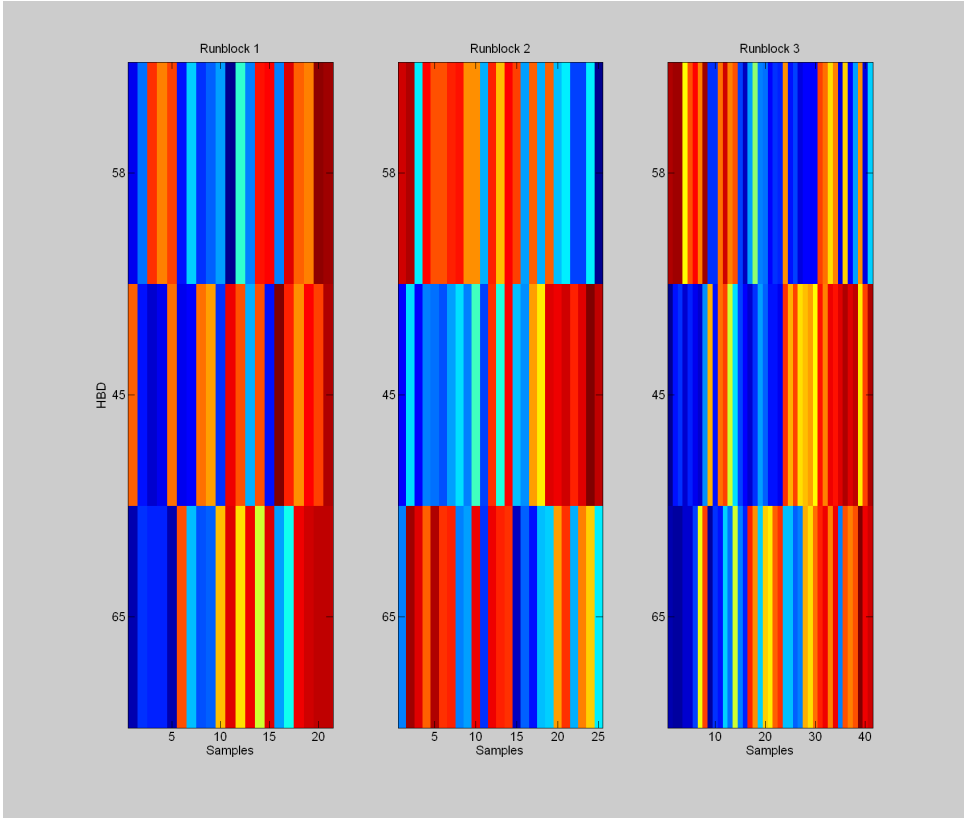

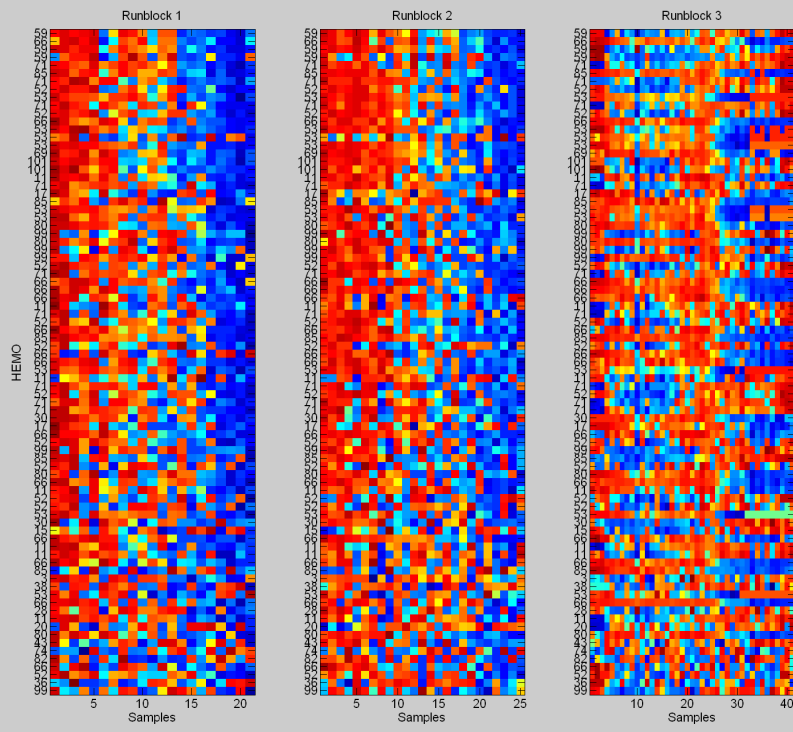

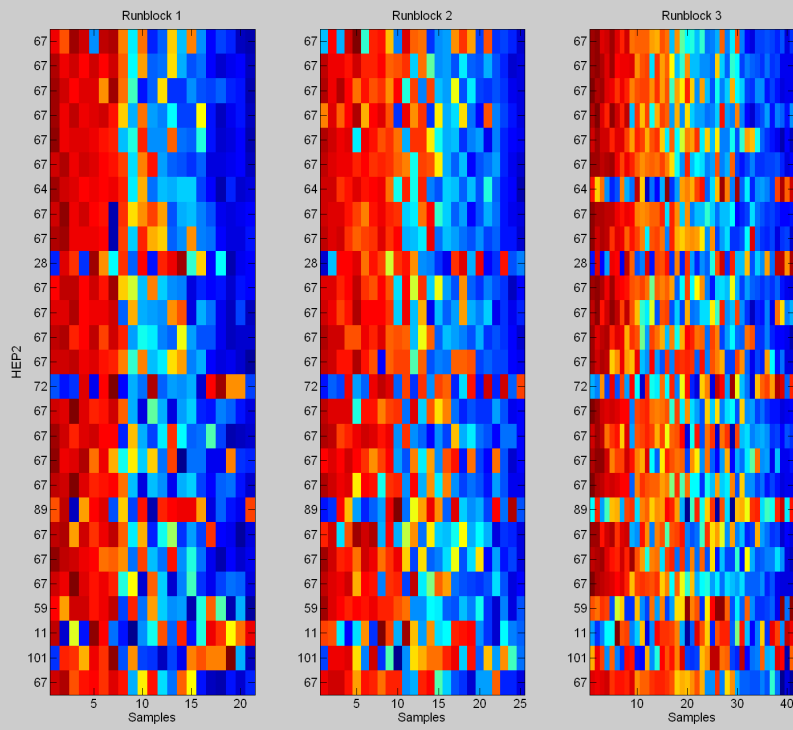

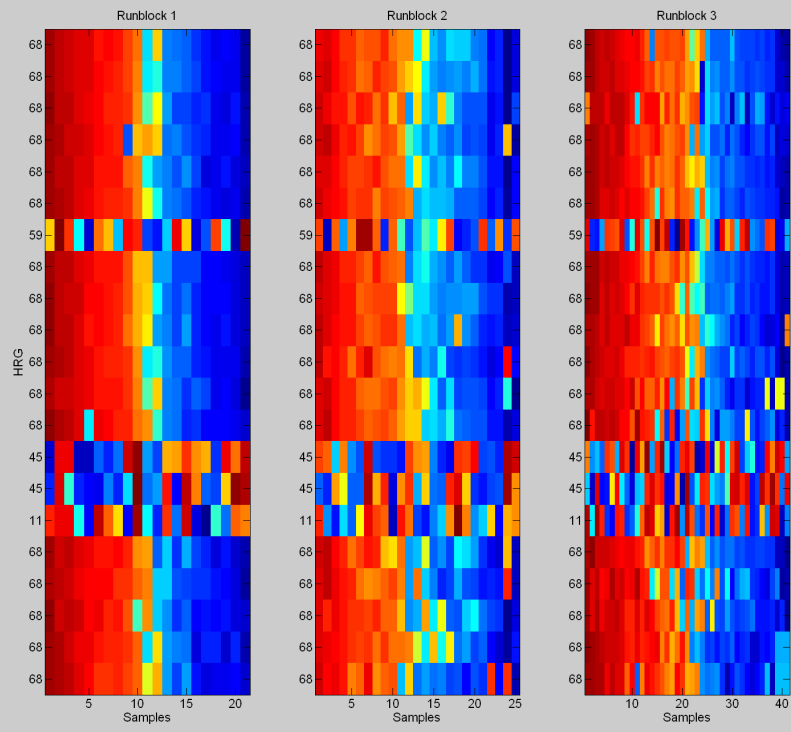

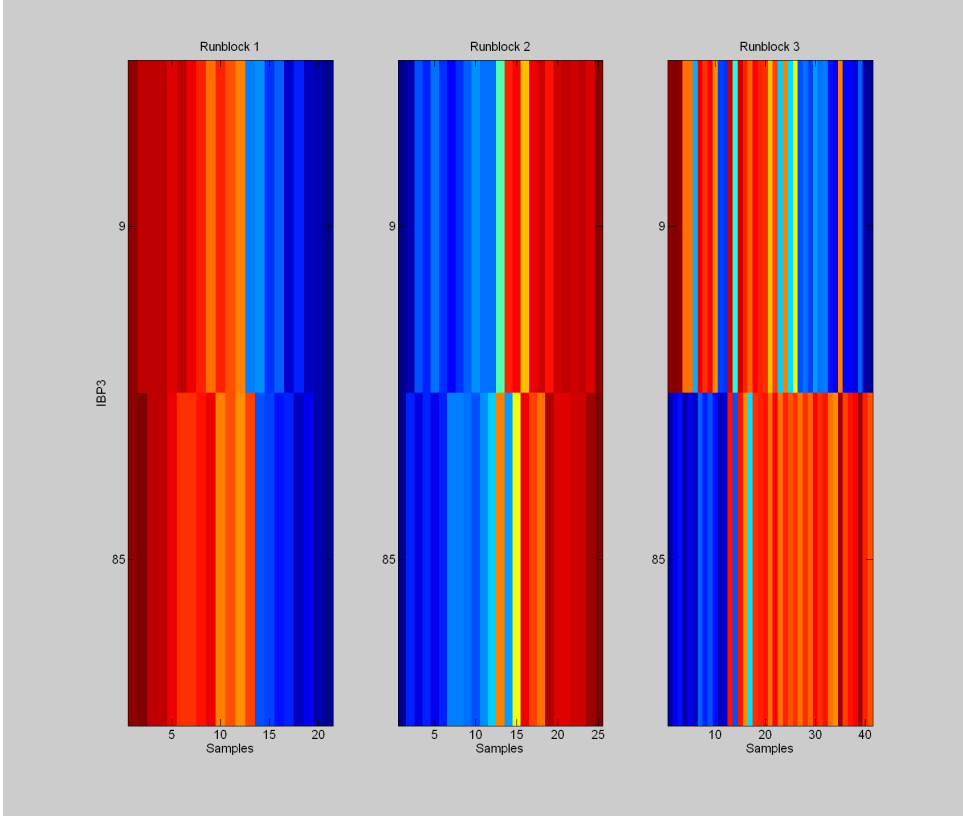

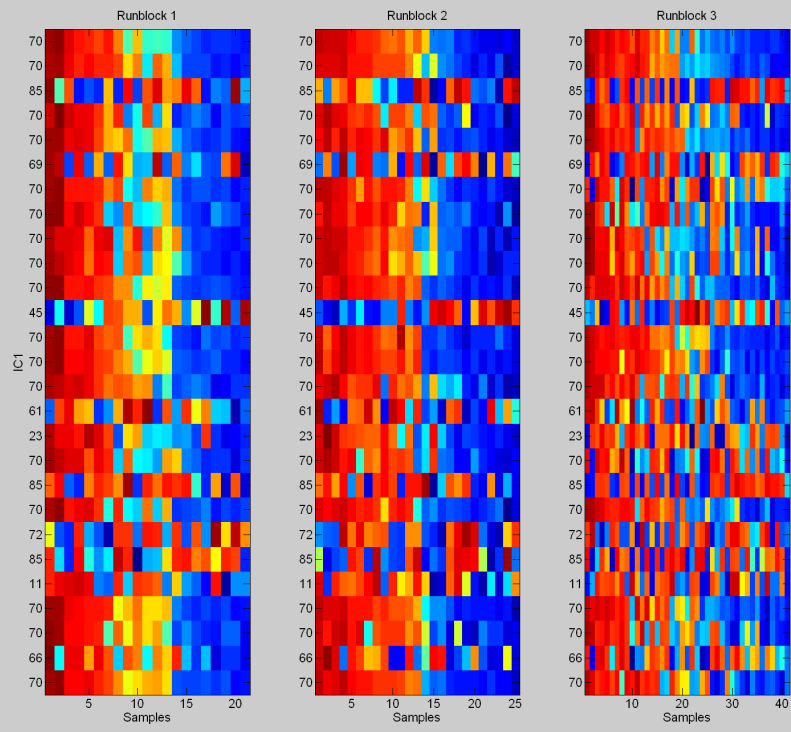

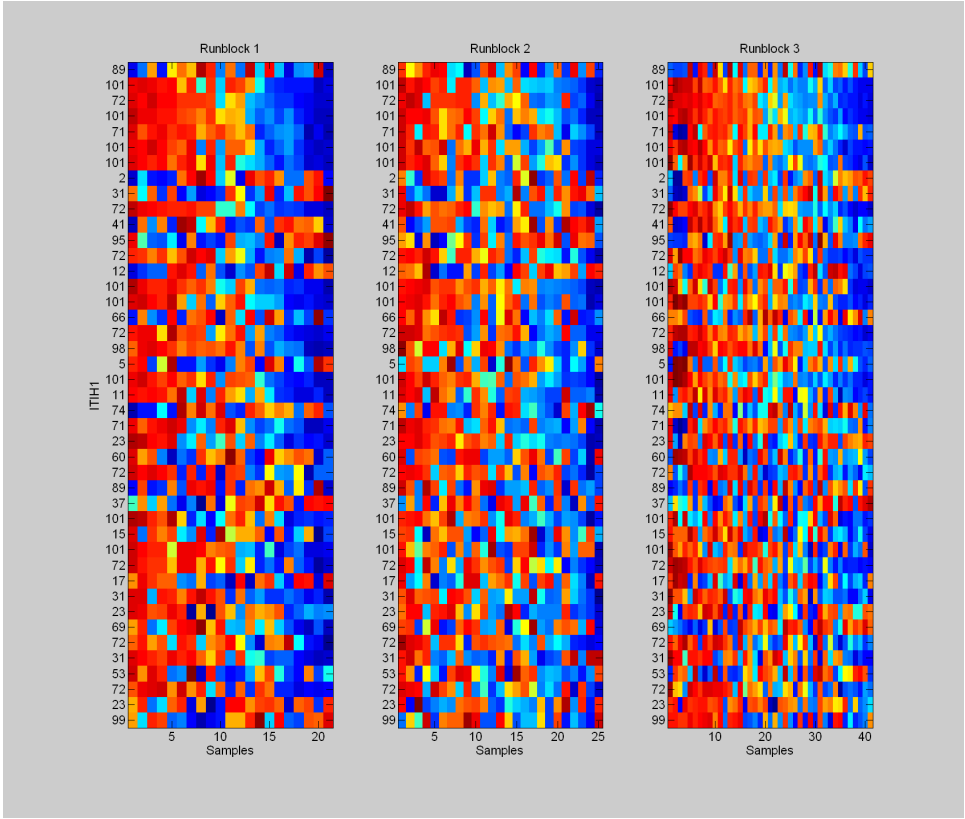



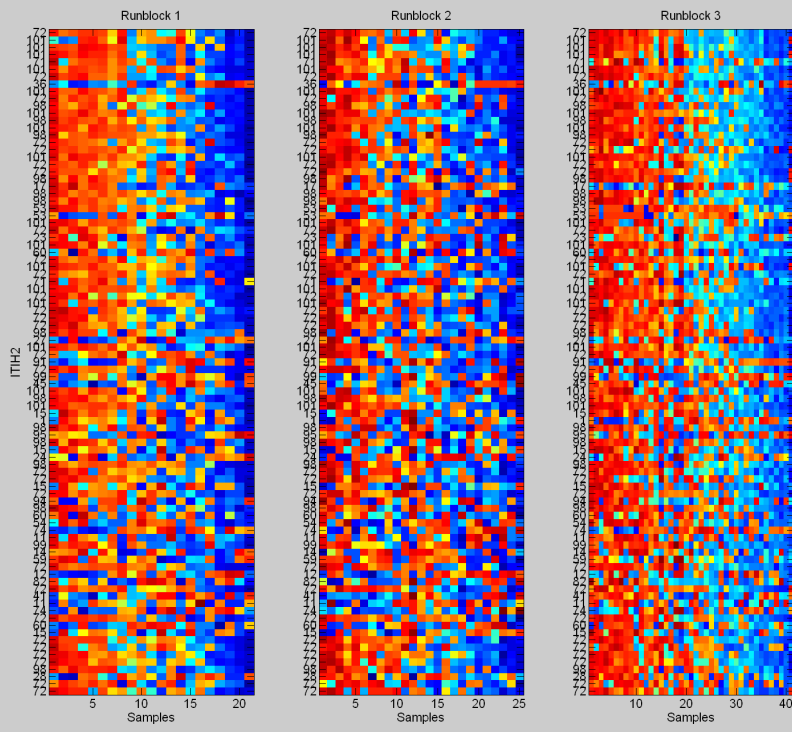

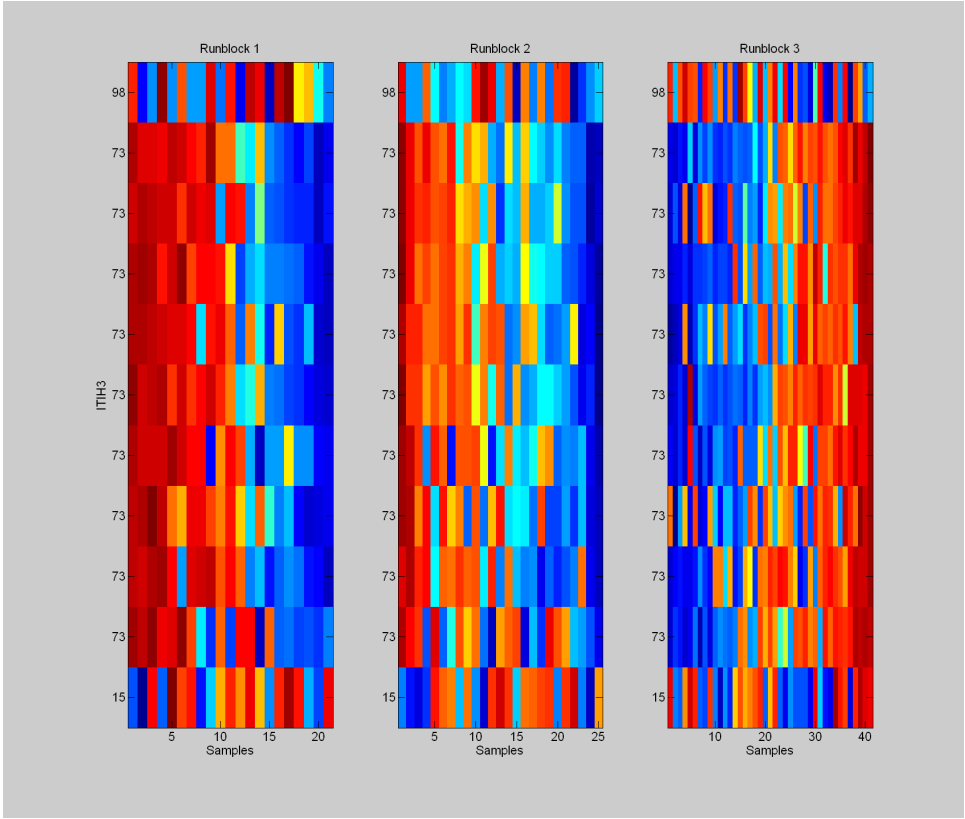

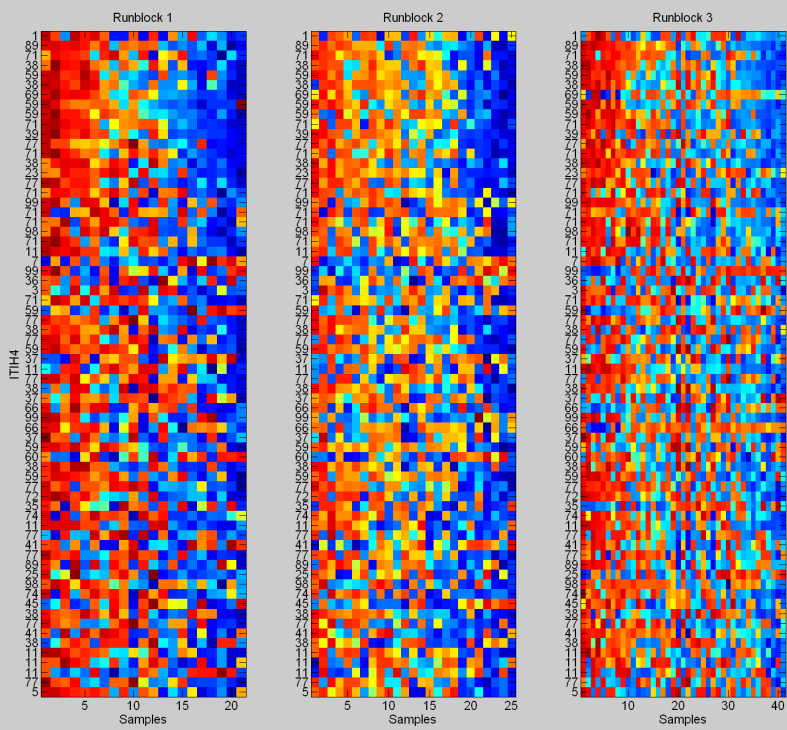

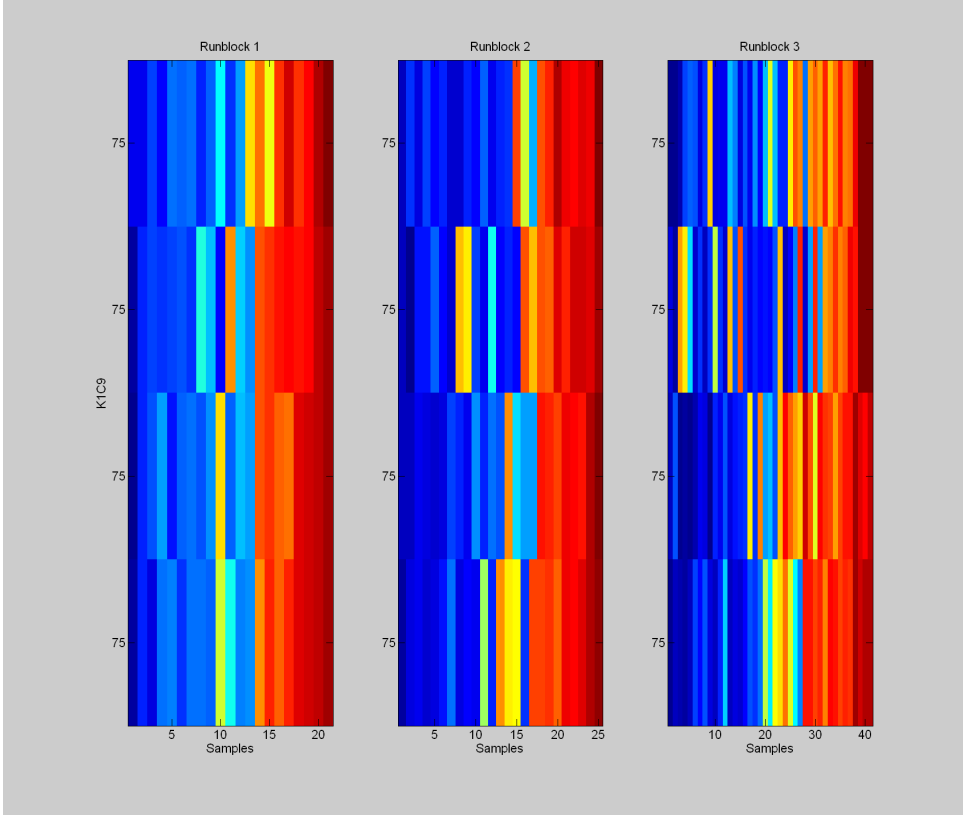

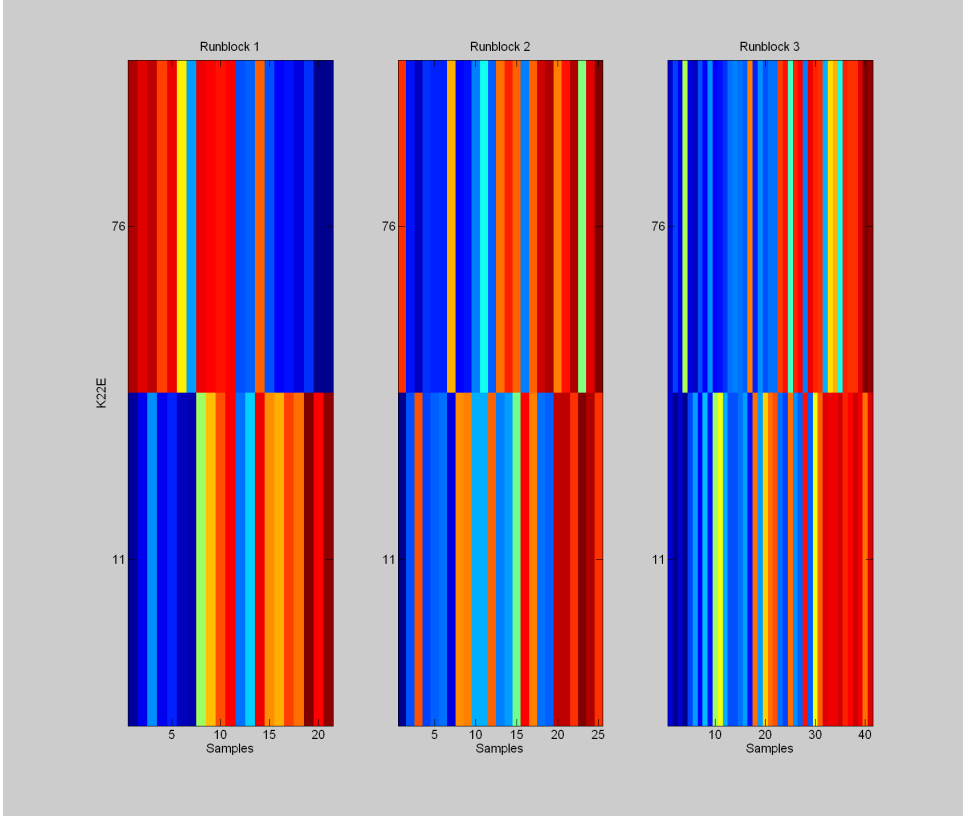

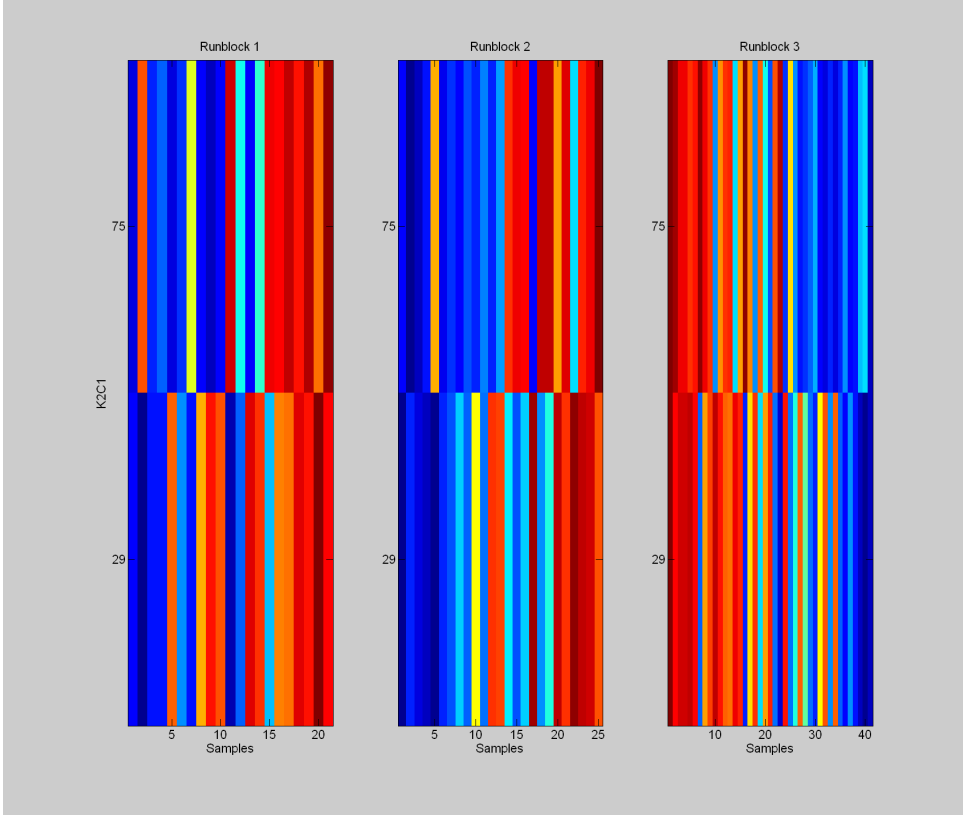

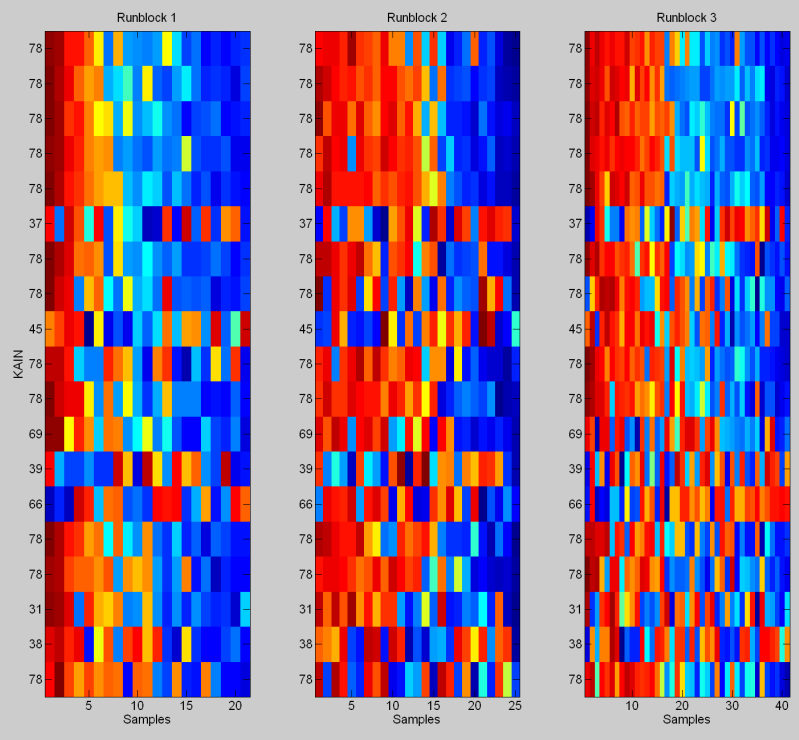

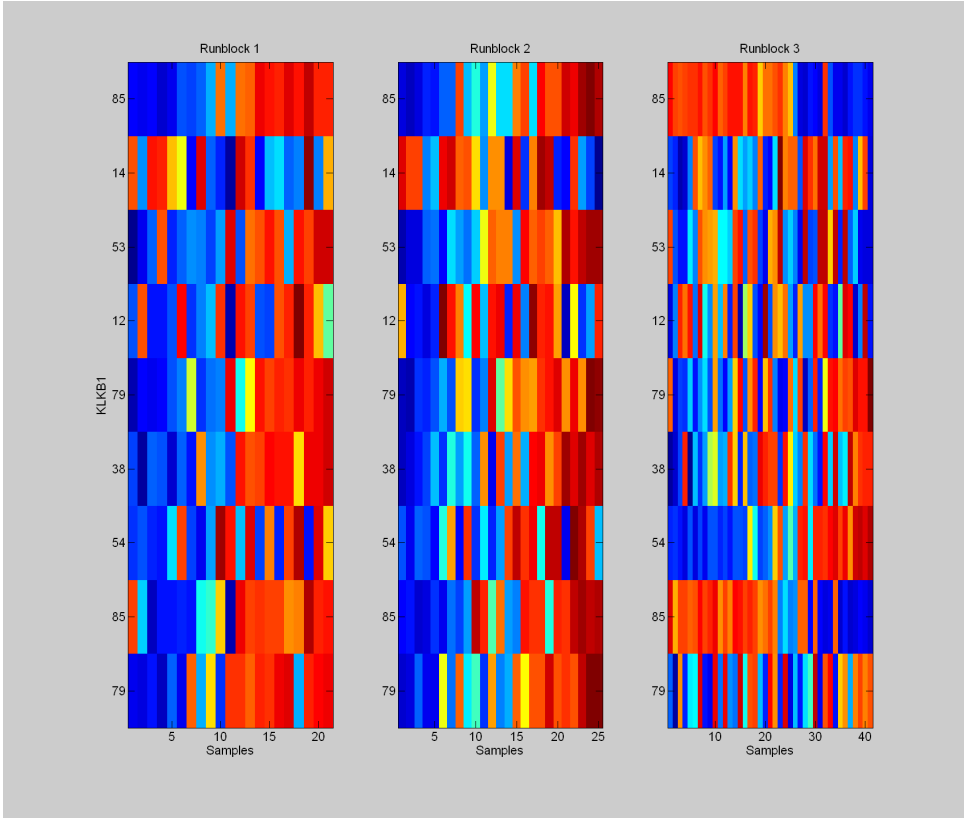



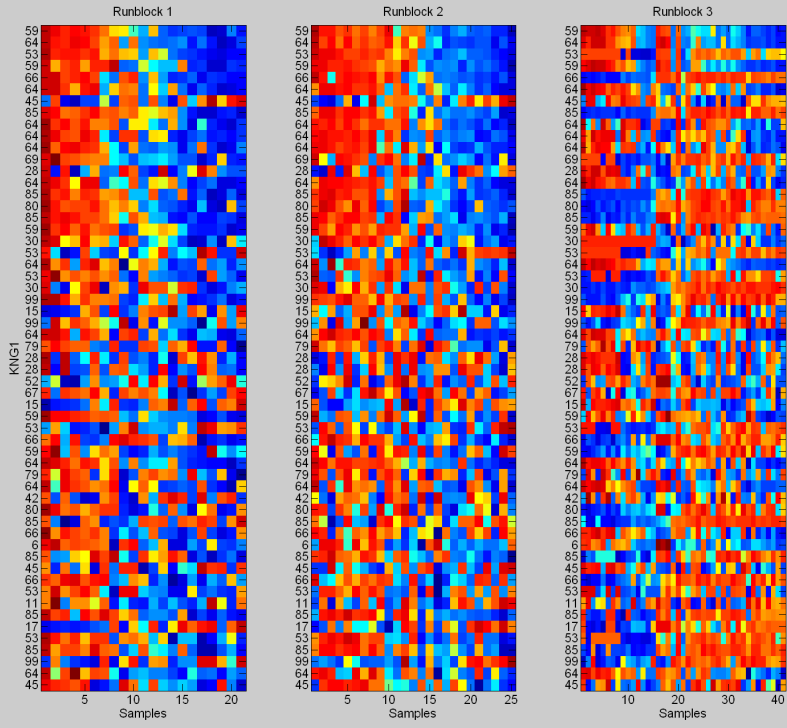

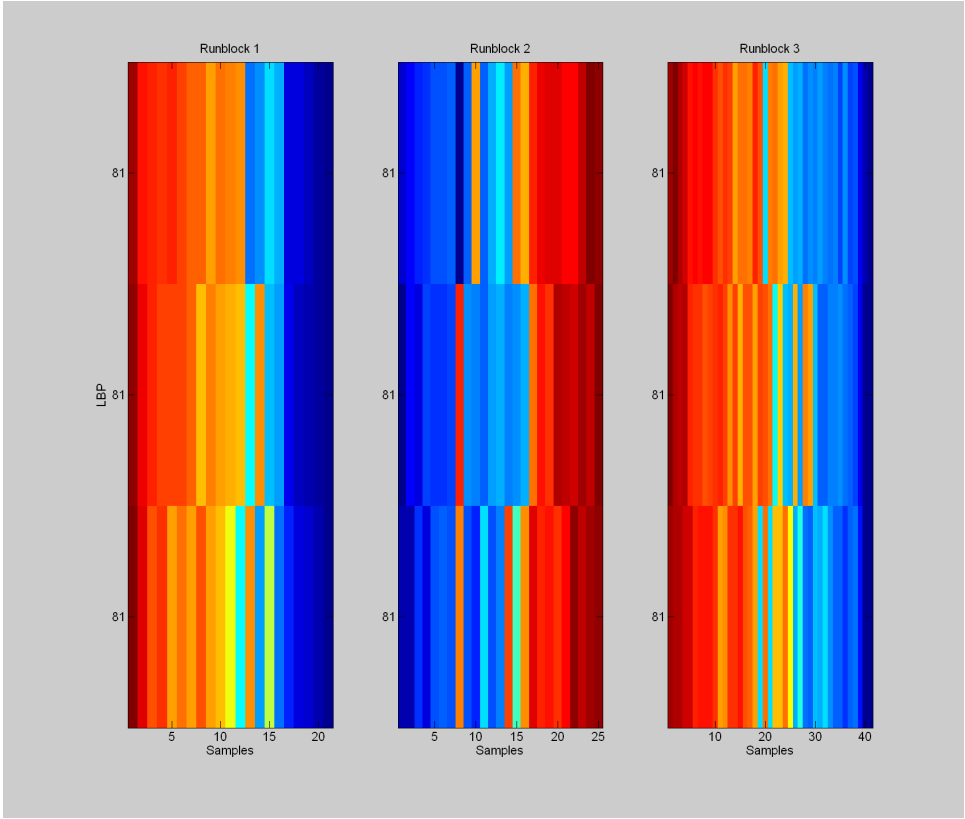

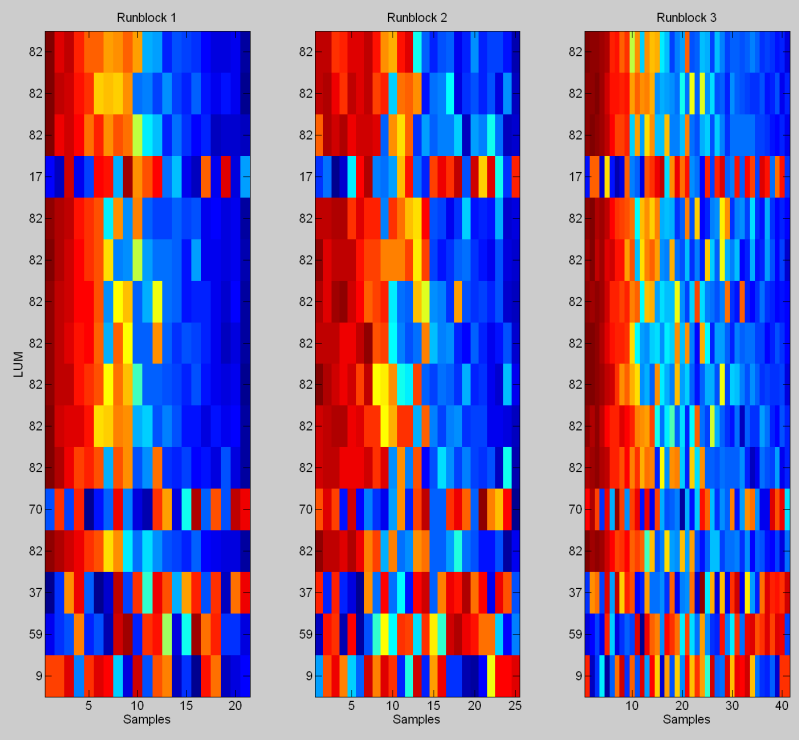

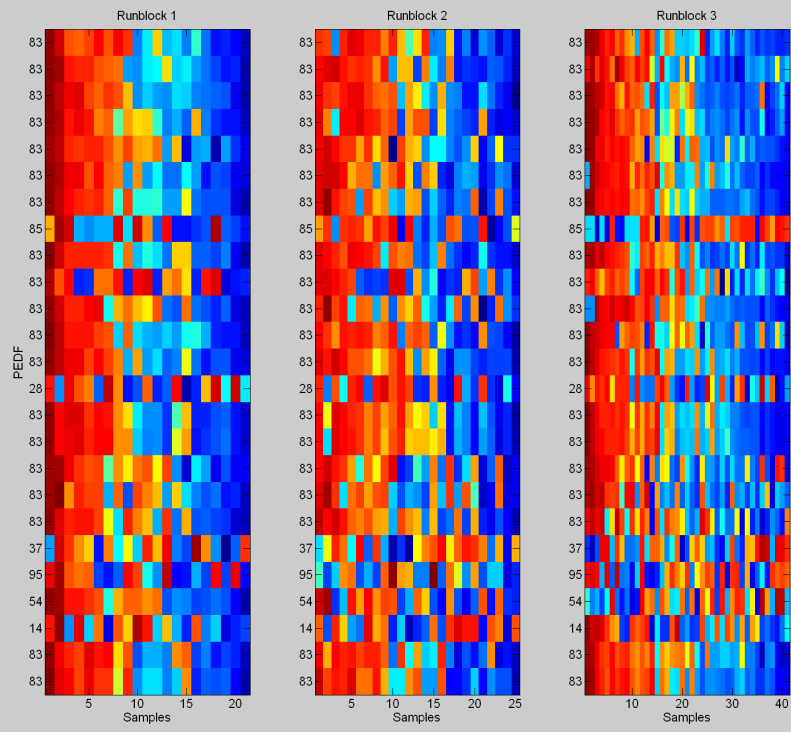

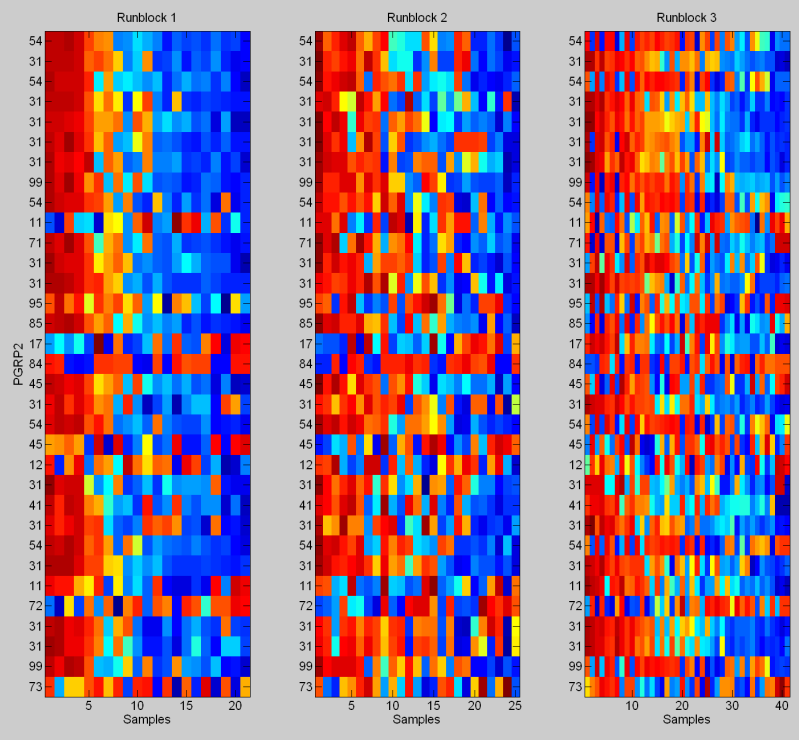

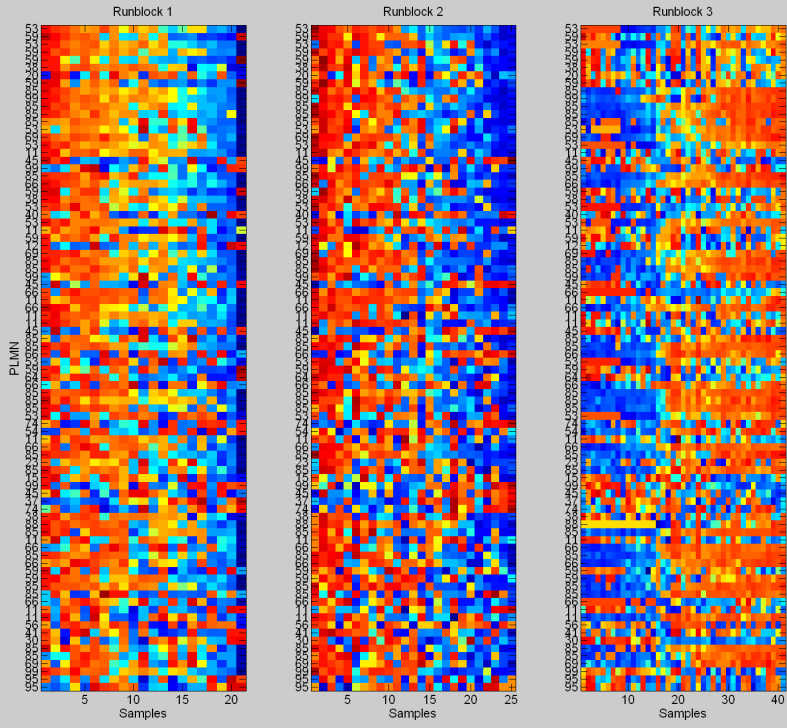

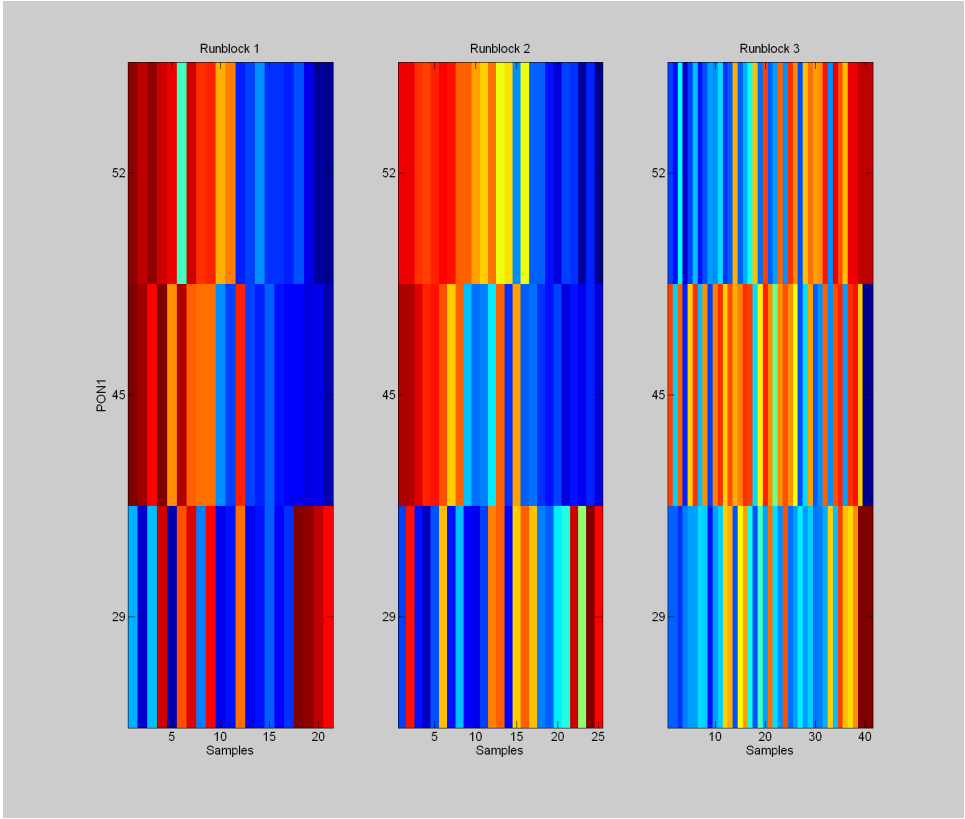

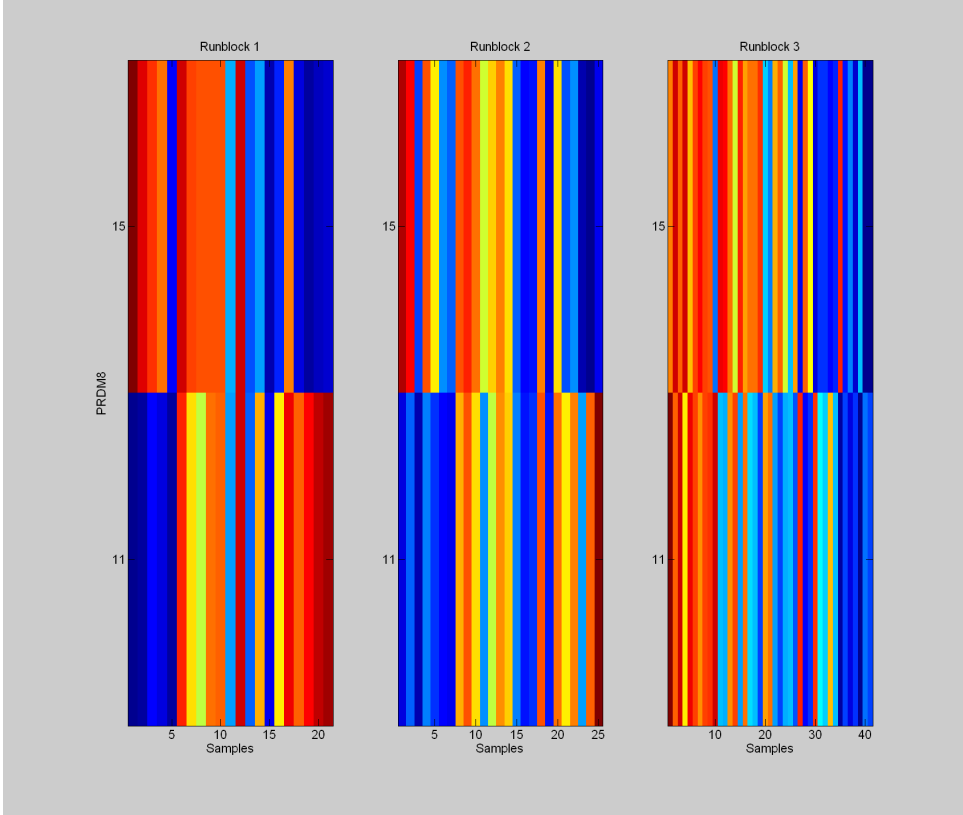



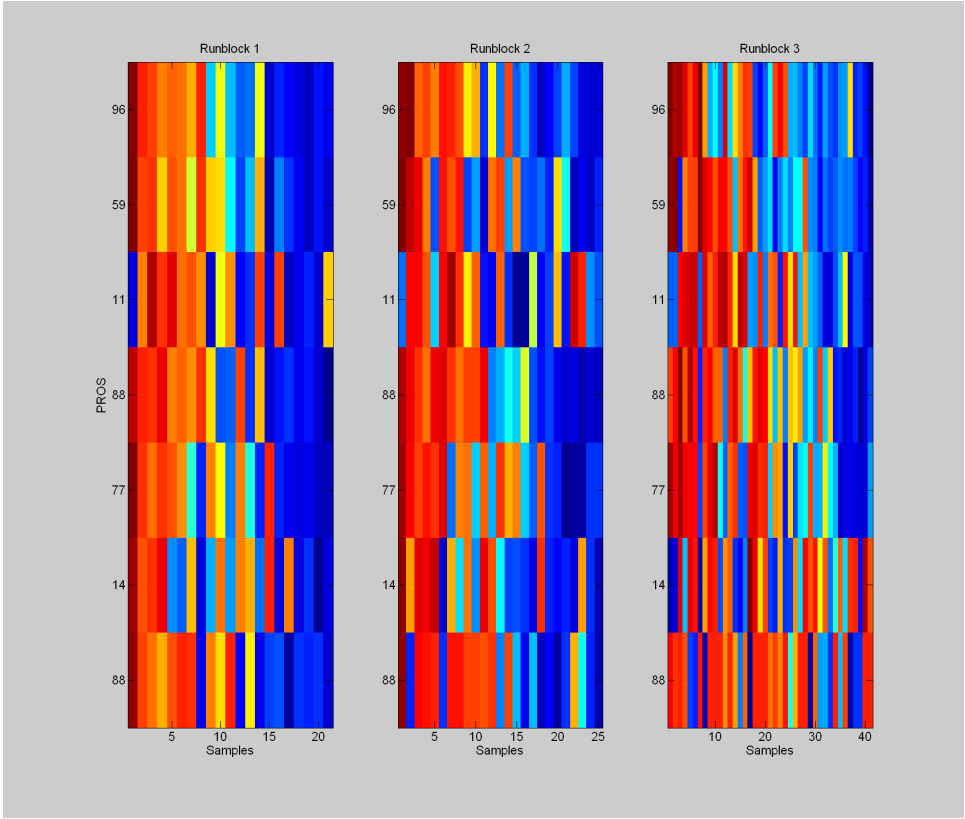

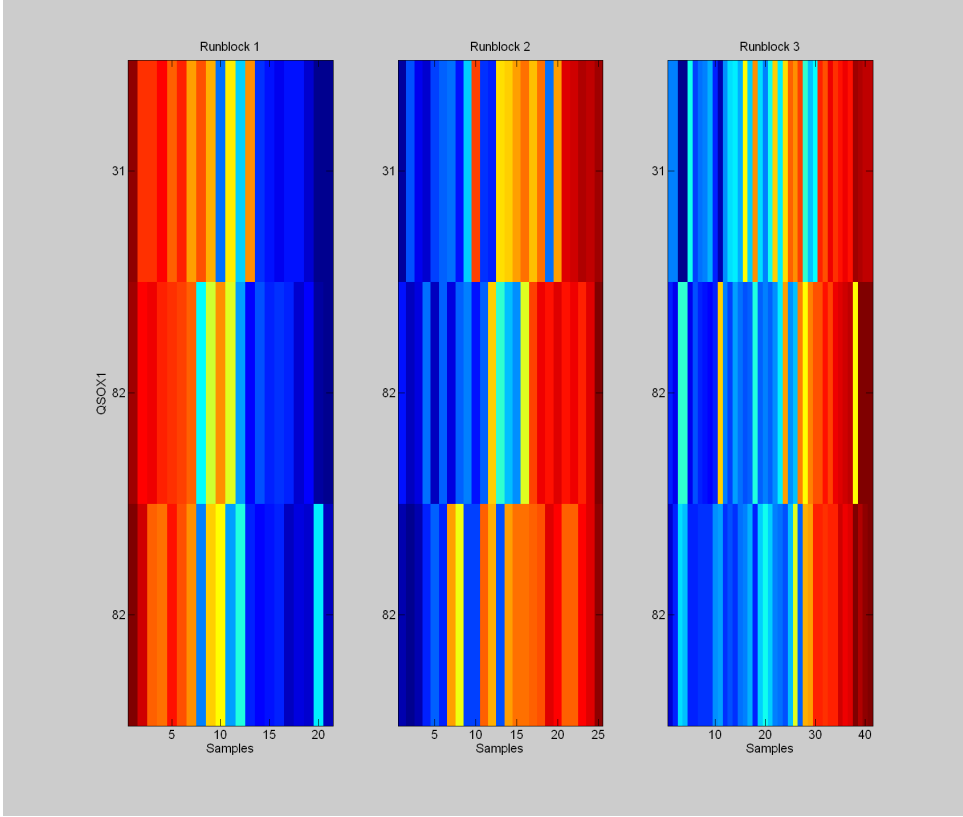

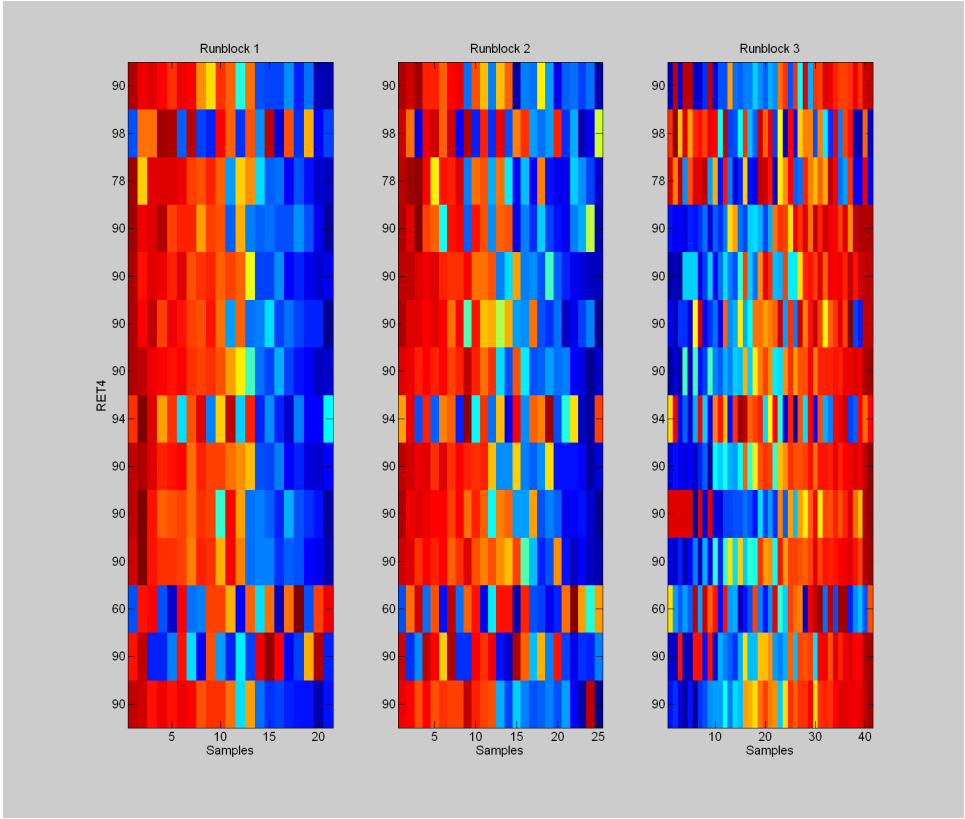

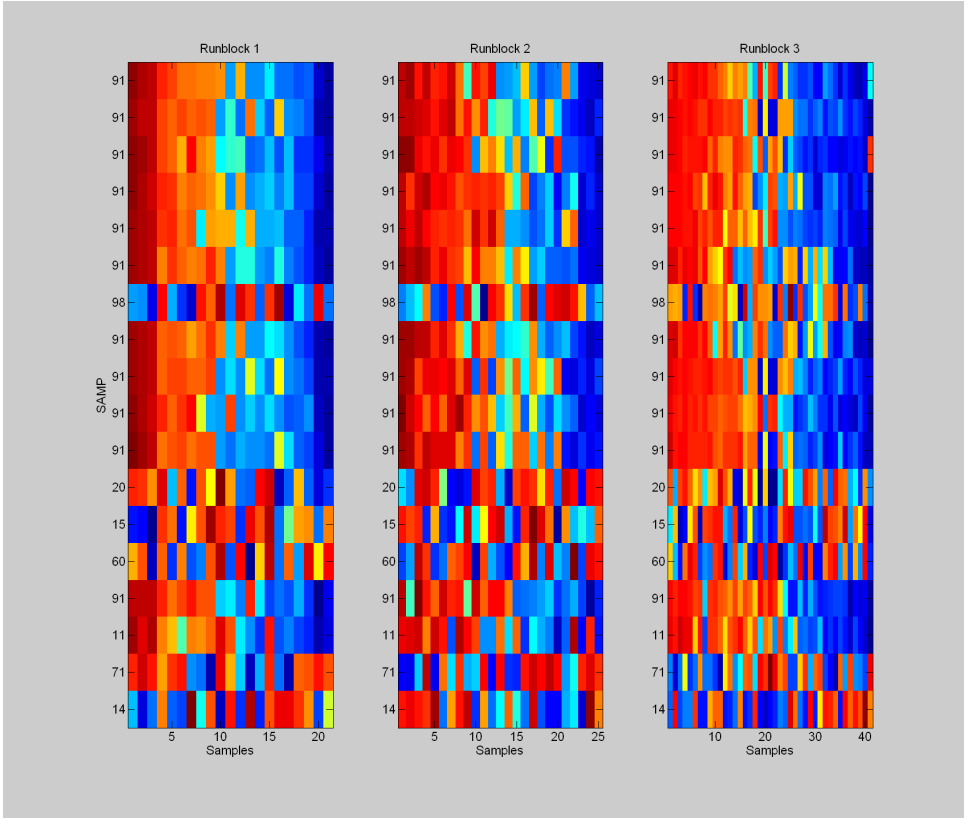

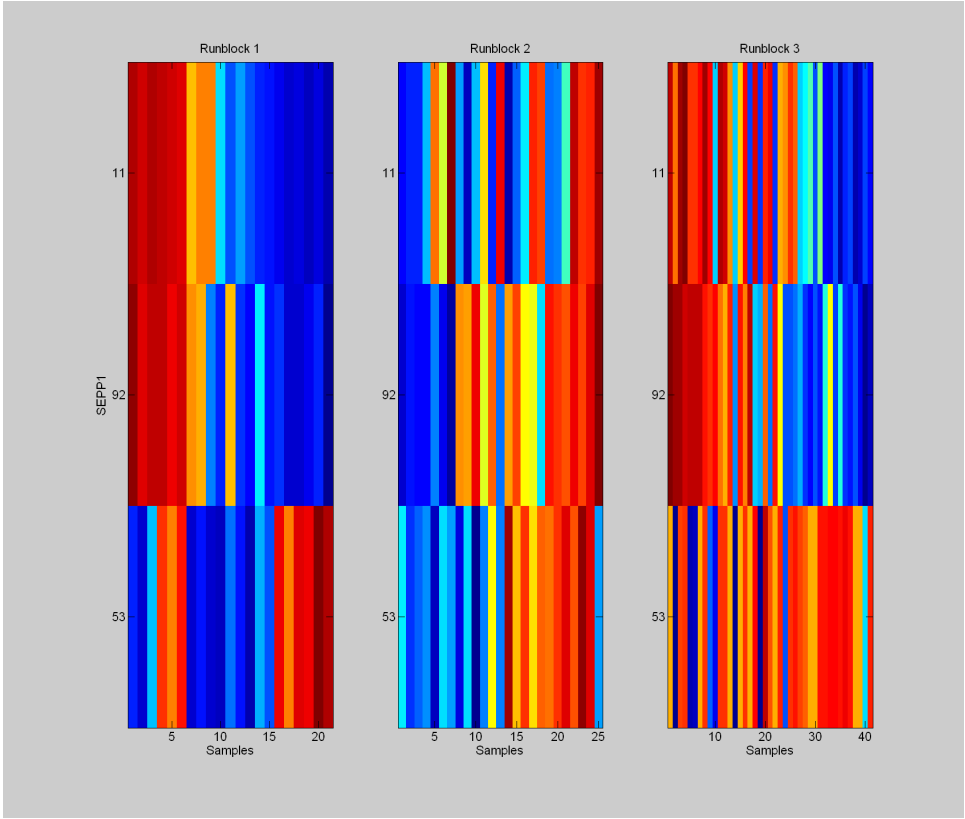

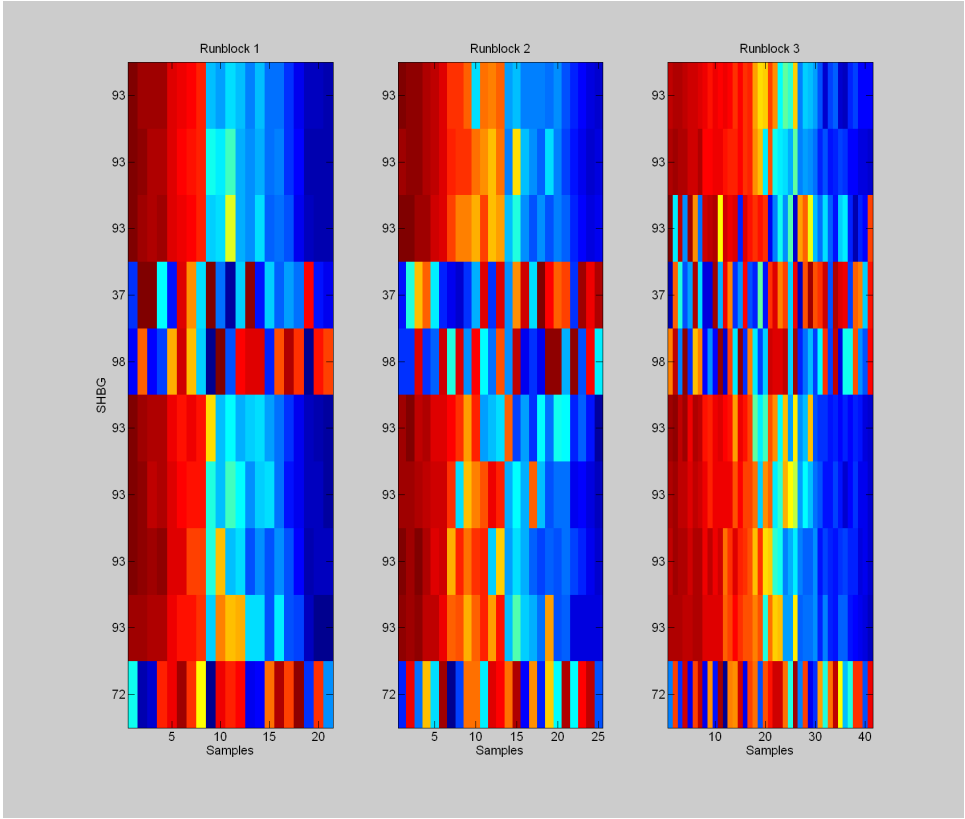

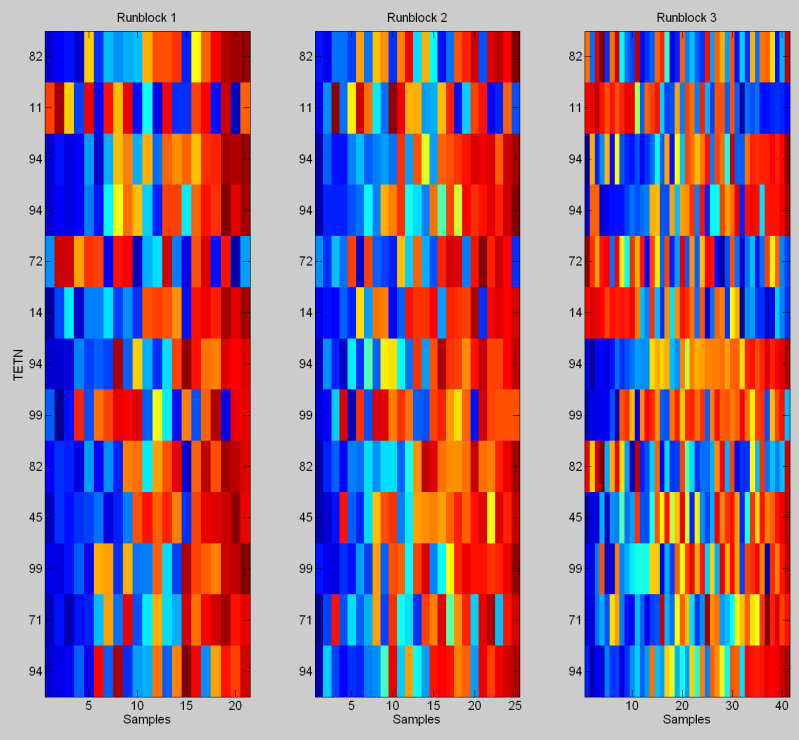

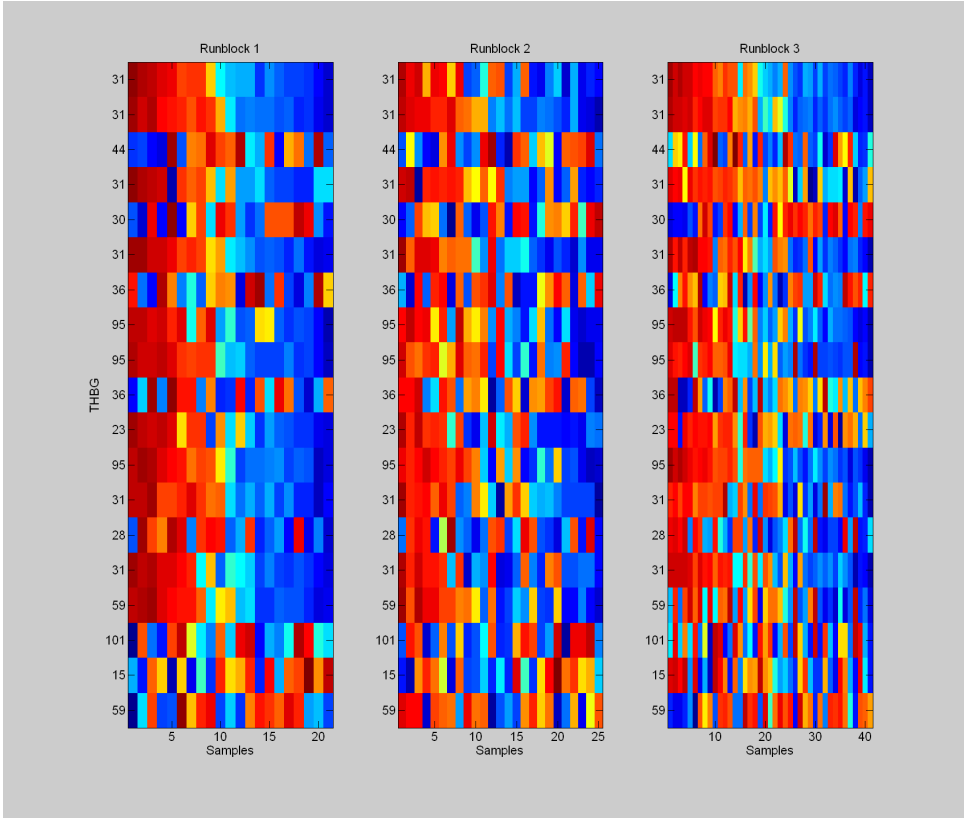



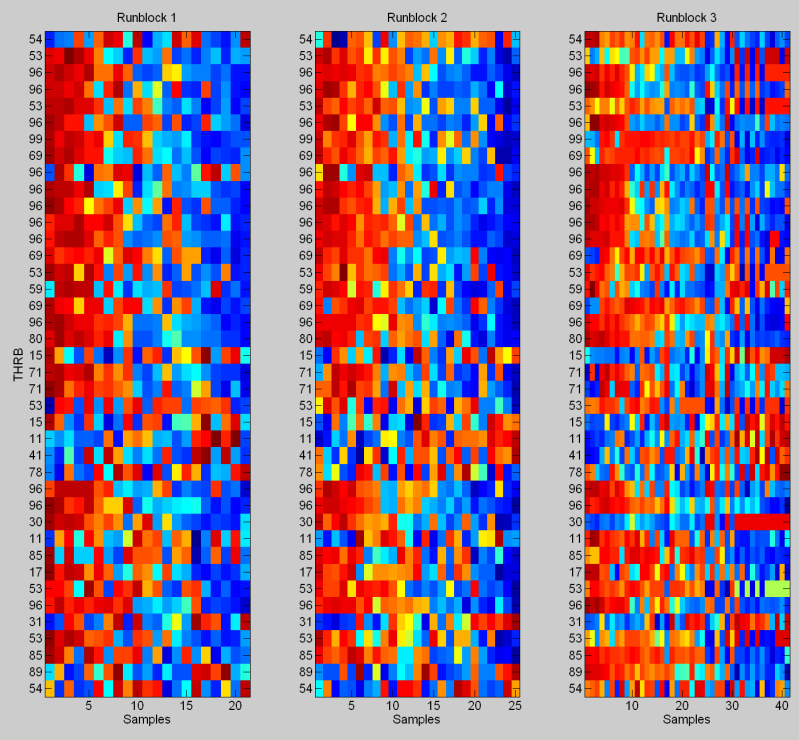

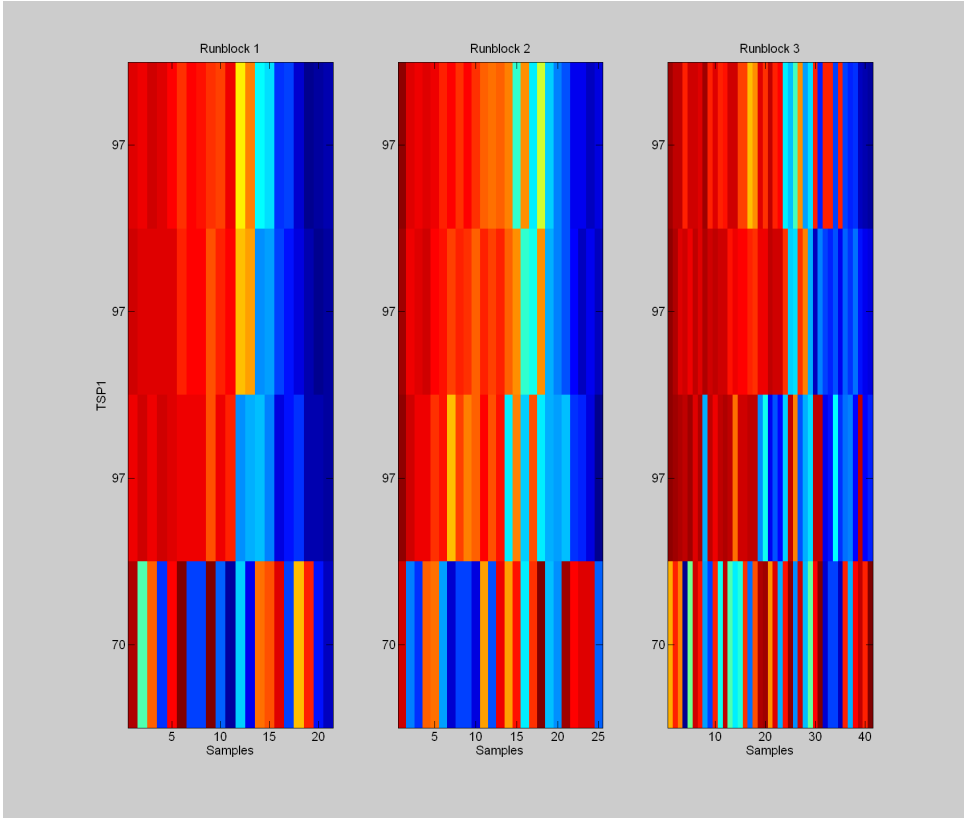

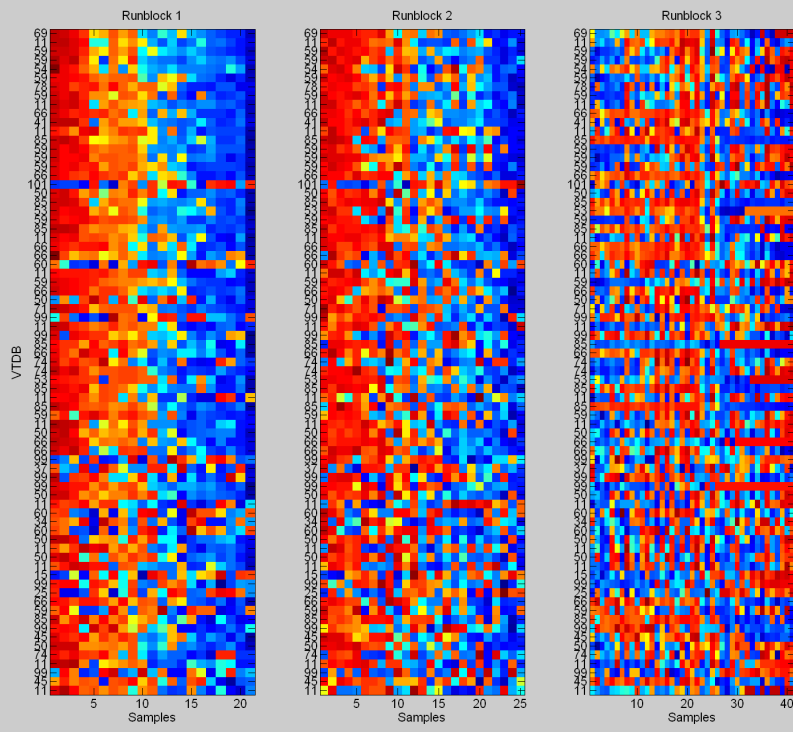

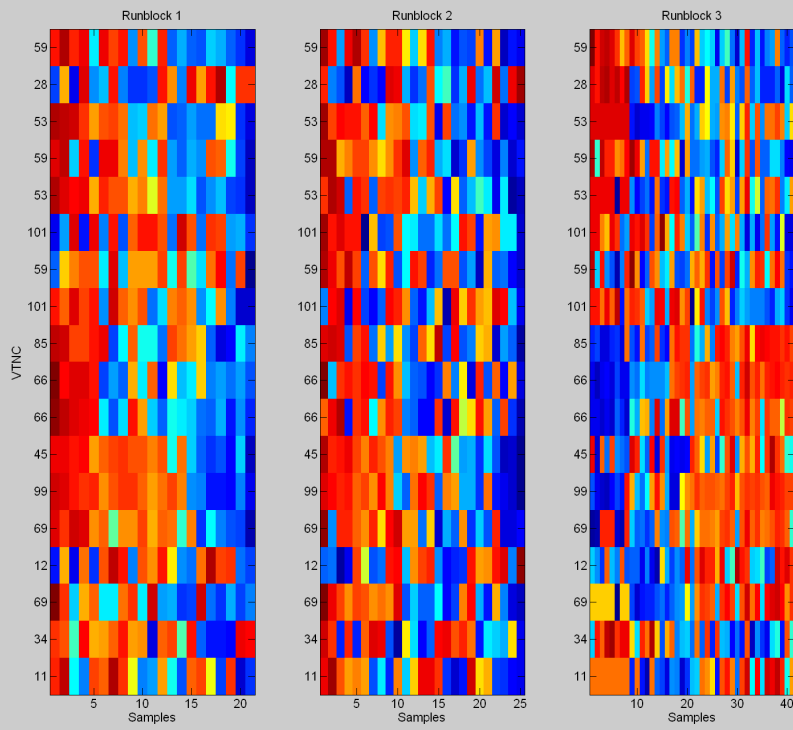

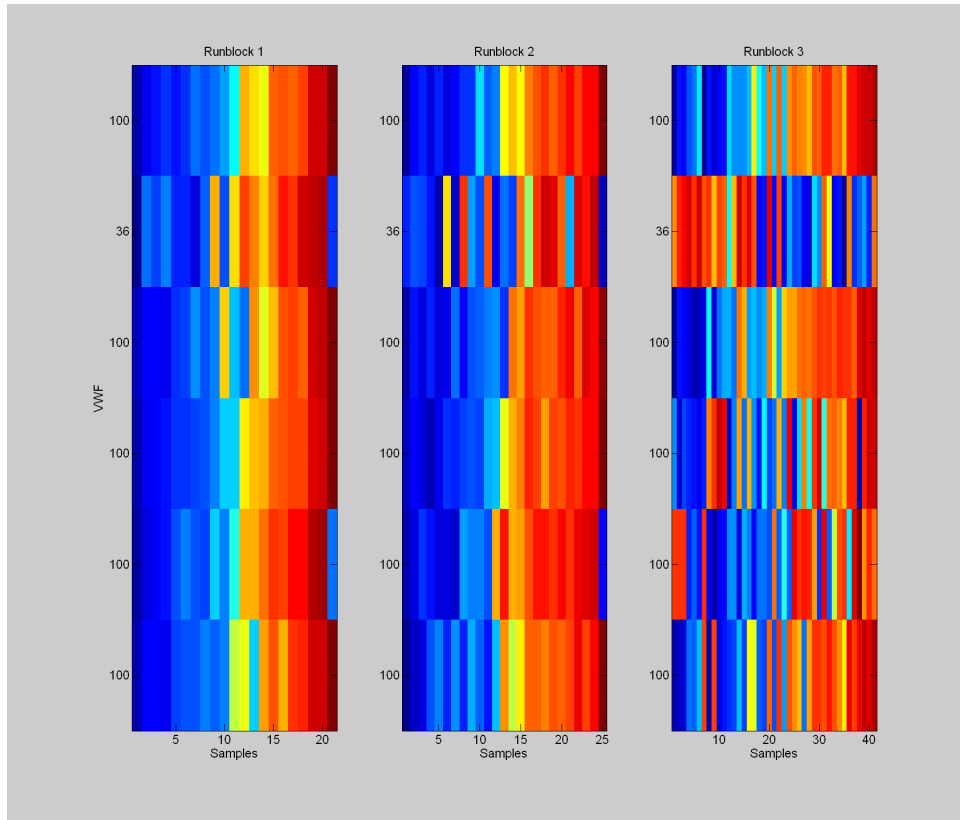

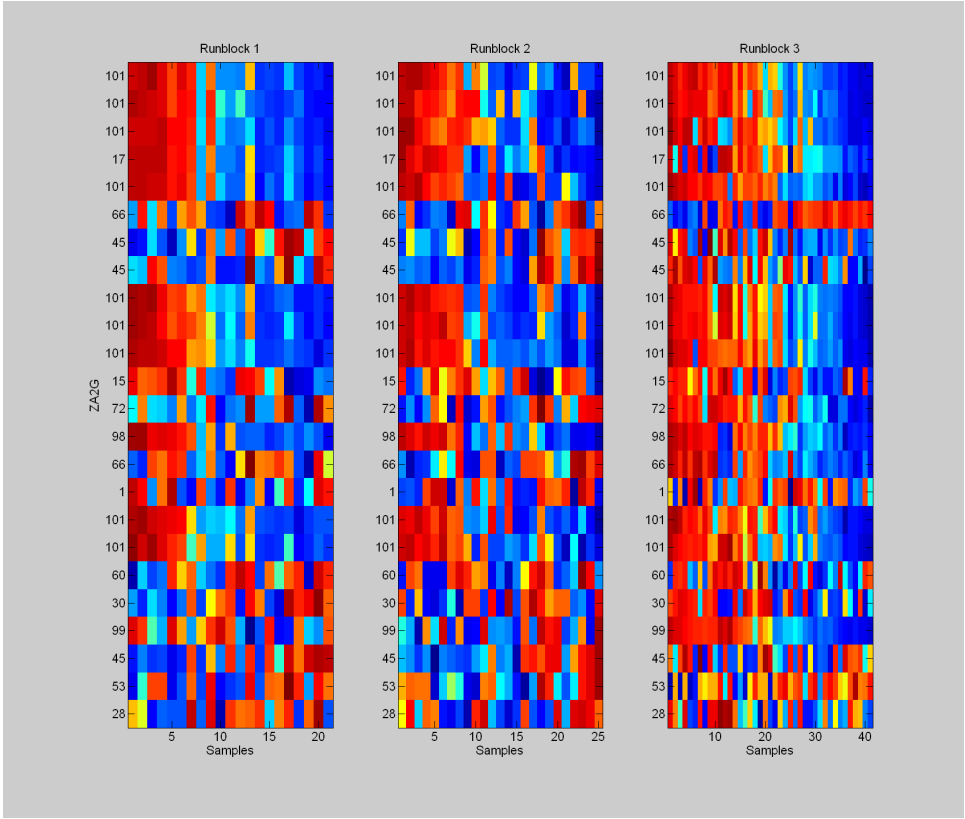

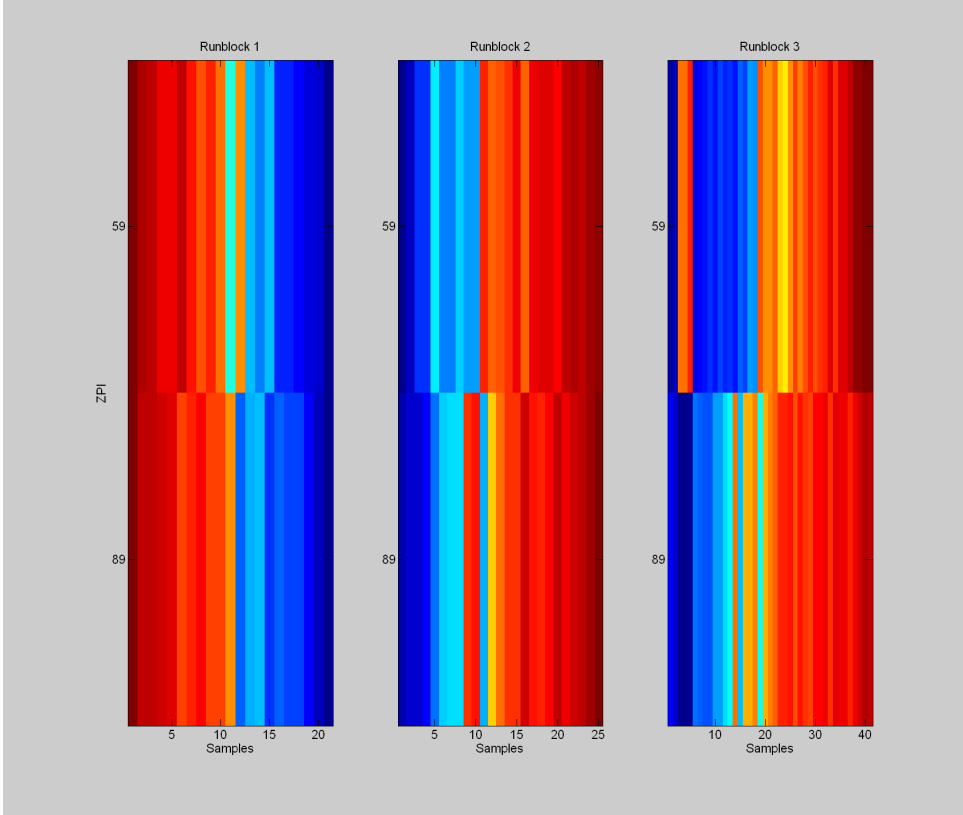

Supplement: 1471-2105-13-74-S2.pdf [file 1471-2105-13-74-S2.pdf]
