# Supplementary material for: Metaprotein expression modeling for label-free quantitative proteomics
Source: PubMed Central journal article supplement (PMC3436780; doi:10.1186/1471-2105-13-74), 2012-05-04
Supplement: 1471-2105-13-74-S3.pdf [file 1471-2105-13-74-S3.pdf]

# Supplemental

E-mail:

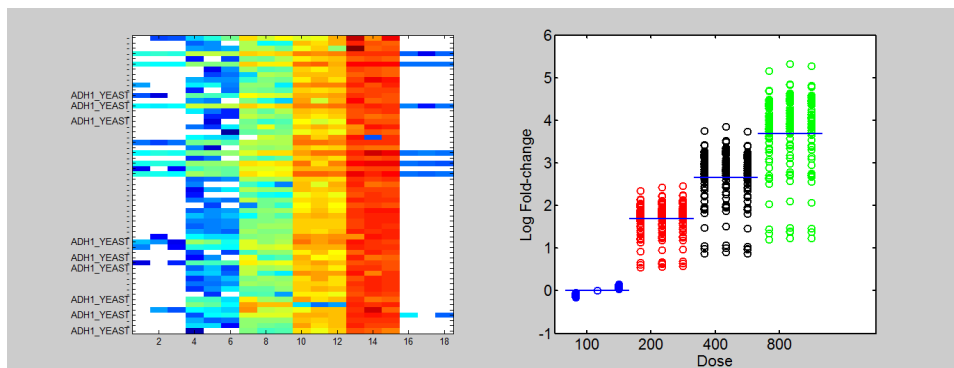

Figure 1: The left figure shows a heatmap of all of the isotope groups in the data set that are associated with the metaprotein ADH1\_YEAST. The labeling on the y-axis indicates the original identification. Each row in each heatmap has been standardized to have mean zero and standard deviation one. Red is a relatively high level of expression and blue a low level of expression. The white color corresponds to missing data. The right figure shows the factor scores by group. This vector represents the estimated fold change based on meta-protein expression level and factor loadings. Each different spot is the estimated fold change associated with one of the isotope groups pictured in the heatmap on the right. We note that typical techniques for estimating fold change of a protein from a collection of isotope groups (such as median (maxQuant) or mean would be usable in this context. The lines in the scatterplot show the average estimated log fold change across all replicates and all isotope groups.

---

\*To whom correspondence should be addressed

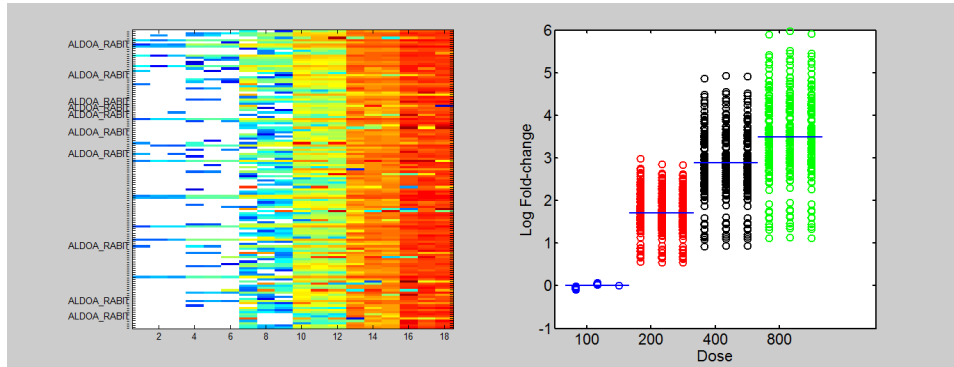

Figure 2: The left figure shows a heatmap of all of the isotope groups in the data set that are associated with the metaprotein ALDOA\_RABIT. The labeling on the y-axis indicates the original identification. Each row in each heatmap has been standardized to have mean zero and standard deviation one. Red is a relatively high level of expression and blue a low level of expression. The white color corresponds to missing data. The right figure shows the factor scores by group. This vector represents the estimated fold change based on meta-protein expression level and factor loadings. Each different spot is the estimated fold change associated with one of the isotope groups pictured in the heatmap on the right. We note that typical techniques for estimating fold change of a protein from a collection of isotope groups (such as median (maxQuant) or mean would be usable in this context. The lines in the scatterplot show the average estimated log fold change across all replicates and all isotope groups.

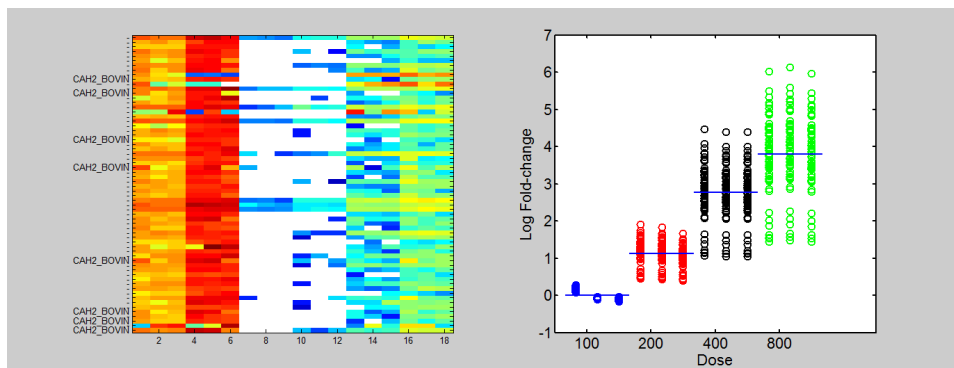

Figure 3: The left figure shows a heatmap of all of the isotope groups in the data set that are associated with the metaprotein CAH2\_BOVIN. The labeling on the y-axis indicates the original identification. Each row in each heatmap has been standardized to have mean zero and standard deviation one. Red is a relatively high level of expression and blue a low level of expression. The white color corresponds to missing data. The right figure shows the factor scores by group. This vector represents the estimated fold change based on meta-protein expression level and factor loadings. Each different spot is the estimated fold change associated with one of the isotope groups pictured in the heatmap on the right. We note that typical techniques for estimating fold change of a protein from a collection of isotope groups (such as median (maxQuant) or mean would be usable in this context. The lines in the scatterplot show the average estimated log fold change across all replicates and all isotope groups.

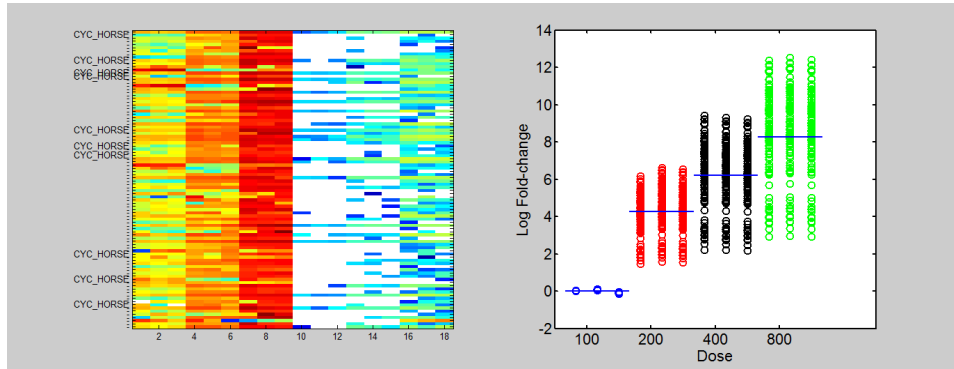

Figure 4: The left figure shows a heatmap of all of the isotope groups in the data set that are associated with the metaprotein `CYC_HORSE`. The labeling on the y-axis indicates the original identification. Each row in each heatmap has been standardized to have mean zero and standard deviation one. Red is a relatively high level of expression and blue a low level of expression. The white color corresponds to missing data. The right figure shows the factor scores by group. This vector represents the estimated fold change based on meta-protein expression level and factor loadings. Each different spot is the estimated fold change associated with one of the isotope groups pictured in the heatmap on the right. We note that typical techniques for estimating fold change of a protein from a collection of isotope groups (such as median (maxQuant) or mean would be usable in this context. The lines in the scatterplot show the average estimated log fold change across all replicates and all isotope groups.

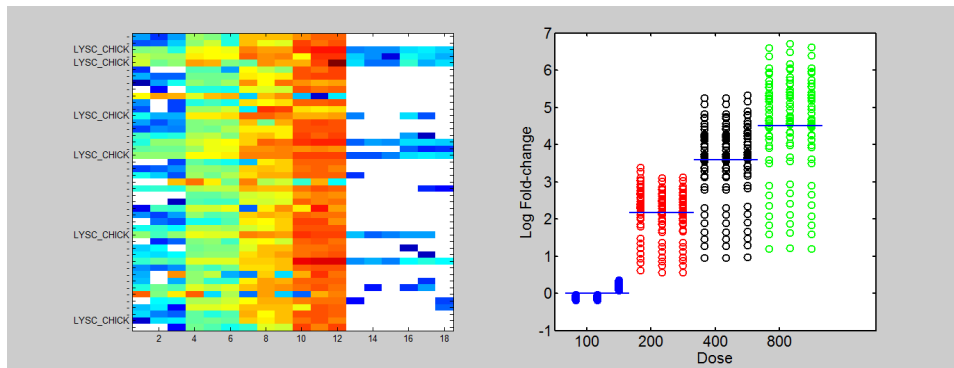

Figure 5: The left figure shows a heatmap of all of the isotope groups in the data set that are associated with the metaprotein `LYSC_CHICK`. The labeling on the y-axis indicates the original identification. Each row in each heatmap has been standardized to have mean zero and standard deviation one. Red is a relatively high level of expression and blue a low level of expression. The white color corresponds to missing data. The right figure shows the factor scores by group. This vector represents the estimated fold change based on meta-protein expression level and factor loadings. Each different spot is the estimated fold change associated with one of the isotope groups pictured in the heatmap on the right. We note that typical techniques for estimating fold change of a protein from a collection of isotope groups (such as median (maxQuant) or mean would be usable in this context. The lines in the scatterplot show the average estimated log fold change across all replicates and all isotope groups.

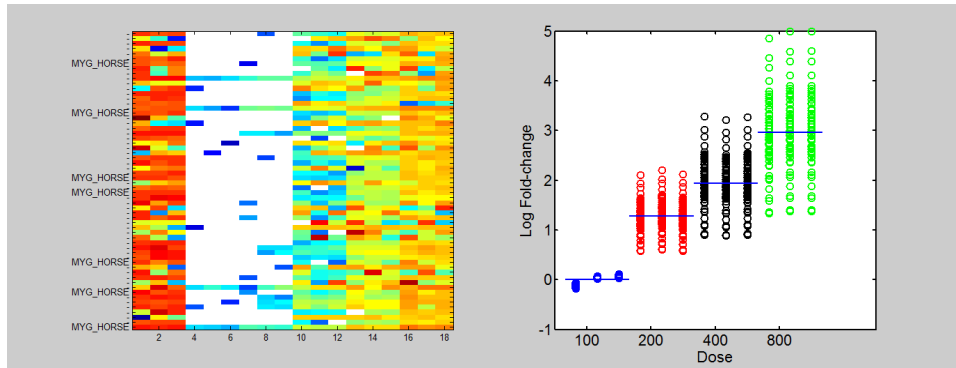

Figure 6: The left figure shows a heatmap of all of the isotope groups in the data set that are associated with the metaprotein MYG\_HORSE. The labeling on the y-axis indicates the original identification. Each row in each heatmap has been standardized to have mean zero and standard deviation one. Red is a relatively high level of expression and blue a low level of expression. The white color corresponds to missing data. The right figure shows the factor scores by group. This vector represents the estimated fold change based on meta-protein expression level and factor loadings. Each different spot is the estimated fold change associated with one of the isotope groups pictured in the heatmap on the right. We note that typical techniques for estimating fold change of a protein from a collection of isotope groups (such as median (maxQuant) or mean would be usable in this context. The lines in the scatterplot show the average estimated log fold change across all replicates and all isotope groups.

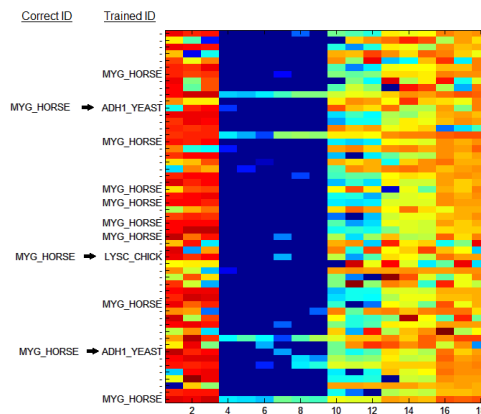

Figure 7: Model performance in the face of incorrect identifications. We permuted the identities of 10% of the isotope groups in the data and tested the ability of our model to recapitulate the correct identifications of the incorrectly identified features. This heatmap shows the MYG\_HORSE metaprotein for one such permutation. Even in the face of 3 incorrect identifications, all of the identified features in the metaprotein were originally identified as originating from MYG\_HORSE.
